# Supplementary material
Source: PubMed Central journal article supplement (PMC1283271)
Supplement: bmj_331_7525_1107__1.pdf [file bmj_331_7525_1107__1.pdf]

**Table A: [As supplied by authors] Summary of intervention effectiveness on neonatal and maternal outcomes.**

| No.                                                                           | Intervention                                                    | Neonatal outcome(s)                                   | Risk reduction on neonatal outcome(s)                                 | Maternal outcome(s)                                 | Risk reduction on maternal outcome(s)** | Reference(s)  |
|-------------------------------------------------------------------------------|-----------------------------------------------------------------|-------------------------------------------------------|-----------------------------------------------------------------------|-----------------------------------------------------|-----------------------------------------|---------------|
| <b>Primary-level health facility or Outreach care</b>                         |                                                                 |                                                       |                                                                       |                                                     |                                         |               |
| 1                                                                             | Tetanus toxoid                                                  | Deaths from tetanus                                   | 90%                                                                   |                                                     |                                         | 1-4           |
| 2                                                                             | Screening for pre-eclampsia                                     | Pre-term deaths                                       | 15%*                                                                  | Deaths from hypertensive disorders during pregnancy | 48%*                                    | 5-6, 30       |
| 3                                                                             | Screening & treatment of asymptomatic bacteruria                | Pre-term deaths                                       | 10%                                                                   | Deaths from sepsis and cases of infertility         | 10%                                     | 6-8           |
| 4                                                                             | Screening & treatment of syphilis                               | Deaths from severe infection & congenital abnormality | Depends on prevalence level.<br>Low: <1%, moderate: 1-2%, high: 4-5%. |                                                     |                                         | 6, 9-11,30    |
| 5                                                                             | Normal delivery by skilled attendant                            | Deaths from severe infection & tetanus                | 15% (severe infection)<br>60% (tetanus)                               | Deaths from sepsis                                  | 40%*                                    | 4,6, 12-14,30 |
| 6                                                                             | Active management of the third stage of labour                  |                                                       |                                                                       | Deaths from PPH & cases of anaemia                  | 62%*                                    | 15            |
| 7                                                                             | Initial management of post-partum haemorrhage                   |                                                       |                                                                       | Deaths from PPH & cases of anaemia                  | 75%*                                    | 15            |
| 8                                                                             | Neonatal resuscitation                                          | Deaths from asphyxia                                  | 38%                                                                   |                                                     |                                         | 6, 16-18,30   |
| <b>Referral care interventions at secondary or tertiary health care level</b> |                                                                 |                                                       |                                                                       |                                                     |                                         |               |
| 9                                                                             | Treatment of severe pre-eclampsia/eclampsia                     | Deaths from asphyxia                                  |                                                                       | Deaths from hypertensive disorders during pregnancy | 59%                                     | 19-20         |
| 10                                                                            | Antibiotics for pre-term premature rupture of membranes (pPROM) | Deaths from severe infection                          | 6%                                                                    |                                                     |                                         | 6, 21-23,30   |
| 11                                                                            | Antenatal steroids for pre-term births                          | Pre-term deaths                                       | 38%                                                                   |                                                     |                                         | 6, 24,30      |

| No.                           | Intervention                                                  | Neonatal outcome(s)                                   | Risk reduction on neonatal outcome(s) | Maternal outcome(s)                                                                 | Risk reduction on maternal outcome(s)** | Reference(s) |
|-------------------------------|---------------------------------------------------------------|-------------------------------------------------------|---------------------------------------|-------------------------------------------------------------------------------------|-----------------------------------------|--------------|
| 12                            | Management of obstructed labour, breech & fetal distress (OL) | Deaths from asphyxia                                  | 40%                                   | Deaths from obstructed labour & Cases of urinary incontinence and obstetric fistula | 95%*                                    | 6, 25-28,30  |
| 13                            | Referral care for severe post-partum haemorrhage (PPH)        |                                                       |                                       | Deaths from PPH & cases of anaemia                                                  | 75%*                                    | 15           |
| 14                            | Management of maternal sepsis                                 |                                                       |                                       | Deaths from sepsis & cases of infertility                                           | 90%*                                    | 29           |
| 15                            | Management of very low birth weight babies (vLBW)             | Pre-term deaths                                       | 25%                                   |                                                                                     |                                         | 6, 30        |
| 16                            | Management of severe neonatal infections                      | Deaths from severe infection                          | 50%                                   |                                                                                     |                                         | 6, 30        |
| 17                            | Management of severe neonatal asphyxia                        | Deaths from asphyxia                                  | 3%                                    |                                                                                     |                                         | 6, 30        |
| 18                            | Management of neonatal jaundice                               | Deaths from jaundice as part of other causes of death | 4%                                    |                                                                                     |                                         | 6, 30        |
| <b>Community newborn care</b> |                                                               |                                                       |                                       |                                                                                     |                                         |              |
| 19                            | Support for breastfeeding mothers                             | Deaths from severe infection & diarrhoea              | Region-specific see Table below       |                                                                                     |                                         | 6, 31-37     |
| 20                            | Support for low birth weight babies                           | Pre-term deaths                                       | 40%                                   |                                                                                     |                                         | 6, 30, 38-43 |
| 21                            | Community-based case management for neonatal pneumonia        | Deaths from severe infection                          | 40%                                   |                                                                                     |                                         | 6, 30, 44-48 |

\*Based on expert panel assessment of available evidence

\*\*Impact is assumed to be the same for reduction in mortality and morbidity outcomes unless otherwise specified

**Table A continued: [As supplied by authors] Region specific effectiveness of breastfeeding promotion<sup>1</sup>**

| Region | % mortality reduction attributable the intervention (through reduction of diarrhea and ARI mortality) Year 1 |                 | % reduction attributable the intervention (through reduction of all cause mortality) Year 2 |                 |
|--------|--------------------------------------------------------------------------------------------------------------|-----------------|---------------------------------------------------------------------------------------------|-----------------|
|        | % Total deaths                                                                                               | % female deaths | % Total deaths                                                                              | % female deaths |
|        | <b>50 % coverage</b>                                                                                         |                 |                                                                                             |                 |
| AfrD   | 12%                                                                                                          | 13%             | 19%                                                                                         | 19%             |
| AfrE   | 13%                                                                                                          | 14%             | 19%                                                                                         | 19%             |
| AmrB   | 10%                                                                                                          | 10%             | 20%                                                                                         | 20%             |
| AmrD   | 10%                                                                                                          | 12%             | 17%                                                                                         | 17%             |
| EmrB   | 15%                                                                                                          | 14%             | 37%                                                                                         | 37%             |
| EmrD   | 14%                                                                                                          | 11%             | 22%                                                                                         | 22%             |
| SearB  | 6%                                                                                                           | 7%              | 14%                                                                                         | 14%             |
| SearD  | 9%                                                                                                           | 9%              | 9%                                                                                          | 9%              |
| WprB   | 11%                                                                                                          | 15%             | 18%                                                                                         | 18%             |
|        | <b>80% coverage</b>                                                                                          |                 |                                                                                             |                 |
| AfrD   | 12%                                                                                                          | 13%             | 21%                                                                                         | 21%             |
| AfrE   | 13%                                                                                                          | 15%             | 21%                                                                                         | 21%             |
| AmrB   | 11%                                                                                                          | 10%             | 11%                                                                                         | 11%             |
| AmrD   | 10%                                                                                                          | 12%             | 18%                                                                                         | 18%             |
| EmrB   | 17%                                                                                                          | 16%             | 39%                                                                                         | 39%             |
| EmrD   | 15%                                                                                                          | 13%             | 18%                                                                                         | 18%             |
| SearB  | 7%                                                                                                           | 8%              | 19%                                                                                         | 19%             |
| SearD  | 10%                                                                                                          | 10%             | 9%                                                                                          | 9%              |
| WprB   | 12%                                                                                                          | 18%             | 8%                                                                                          | 8%              |
|        | <b>95% coverage</b>                                                                                          |                 |                                                                                             |                 |
| AfrD   | 12%                                                                                                          | 13%             | 21%                                                                                         | 21%             |
| AfrE   | 14%                                                                                                          | 15%             | 21%                                                                                         | 21%             |
| AmrB   | 11%                                                                                                          | 10%             | 7%                                                                                          | 7%              |
| AmrD   | 11%                                                                                                          | 12%             | 17%                                                                                         | 17%             |
| EmrB   | 17%                                                                                                          | 16%             | 39%                                                                                         | 39%             |
| EmrD   | 15%                                                                                                          | 13%             | 18%                                                                                         | 18%             |
| SearB  | 7%                                                                                                           | 7%              | 11%                                                                                         | 11%             |

<sup>1</sup>Adam T and Lauer JA. Modeling of breastfeeding-attributable reductions in neonatal mortality, diarrhea, and pneumonia by region (unpublished). World Health Organization, 2004.

---

## References for Table A

---

- 1 Black R, Huber D, Curlin G. Reduction of neonatal tetanus by mass immunization of non-pregnant women: duration of protection from one or two doses of aluminum-adsorbed tetanus toxoid. *Bull World Health Organ* 1980;58:927-930.
  - 2 Kapoor S, Reddaiah V, Lobo J. Control of tetanus neonatorum in a rural area. *Indian J Pediatr* 1991;58:341-344.
  - 3 Rahman M, Chen L, Chakraborty J, Yunus M, Faruque A, Chowdhury A. Use of tetanus toxoid for the prevention of neonatal tetanus. 1. Reduction of neonatal mortality by immunization of non-pregnant and pregnant women in rural Bangladesh. *Bull World Health Organ* 1982;60(1):261-267.
  - 4 Rahman S. The effect of traditional birth attendants and tetanus toxoid in reduction of neonatal mortality. *J Trop Pediatr* 1982;28:163-165.
  - 5 Abalos E, Duley L, Steyn D, Henderson-Smart D. Antihypertensive drug therapy for mild to moderate hypertension during pregnancy. *Cochrane Database of Systematic Reviews* 2001;Issue 1.
  - 6 Bhutta ZA, Darmstadt GL, Hasan B, Haws R. Community-based interventions for improving perinatal and neonatal health outcomes in developing countries: review of the evidence. *Pediatrics* 2005;115:519-617.
  - 7 Gichangi P, Ndinya-Achola J, Ombete J, Nagelkerke N, Temmerman M. Antimicrobial prophylaxis in pregnancy: a randomized placebo-controlled trial with cefetamet-pivoxil in pregnancy women with a poor obstetric history. *Am J Obstet Gynecol* 1997;177:680-684.
  - 8 Smaill F. Antibiotics for asymptomatic bacteriuria in pregnancy (Cochrane Review). The Cochrane Library. Oxford: Update Software, 2002.
  - 9 Wawer M, Sewankambo N, Serwadda D, et al. Control of sexually transmitted diseases for AIDS prevention in Uganda: a randomised community trial. *Lancet* 1999;353:525-535.
  - 10 Osman N, Challis K, Cotiro M, Nordahl G, Bergstrom S. Maternal and fetal characteristics in an obstetric cohort in Mozambique. *Afr J Reprod Health* 2000;4:110-119.
  - 11 Temmerman M, Gichangi P, Fonck K, et al. Effect of a syphilis control programme on pregnancy outcome in Nairobi, Kenya. *Sex Transm Infect* 2000;76:117-121.
  - 12 Kapoor S, Reddaiah V, Lobo J. Control of tetanus neonatorum in a rural area. *Indian J Pediatr* 1991;58:341-344.
  - 13 Meegan M, Conroy R, Lengeny S, Renhault K, Nyangole J. Effect on neonatal tetanus mortality after a culturally-based health promotion programme. *Lancet* 2001;358:640-641.
  - 14 Chongsuvivatwong V, Bujakorn L, Kanpoy V, Treerong R. Control of neonatal tetanus in southern Thailand. *Int J Epidemiol* 1993;22:931-935.
  - 15 Gulmezoglu, Villar et al. WHO multicentre randomised trial of misoprostol in the management of the third stage of labour. *Lancet* 2001; 358:689-95
  - 16 Bang A, Bang R, Baitule S, Reddy M, Deshmukh M. Effect of home-based neonatal care and management of sepsis on neonatal mortality: field trial in rural India. *Lancet* 1999;354:1955-1961.
  - 17 Zhu X, Fang H, Zeng S, Li Y, Lin H, Shi S. The impact of the neonatal resuscitation program guidelines (NRPG) on the neonatal mortality in a hospital in Zhuhai, China. *Singapore Med J* 1997;38:485-487.
  - 18 Sibley L, Sipe T. Traditional birth attendant training effectiveness: A meta-analysis (Final Technical Report). Washington, DC: Academy for Educational Development/Sara Project, 2002.
  - 19 Magpie Trial Collaborative Group. Do women with pre-eclampsia and their babies benefit from magnesium sulphate? The Magpie Trial: a randomised placebo controlled trial. *Lancet* 2002; 359: 1877-90
  - 20 Duley L, Gülmezoglu A, Henderson-Smart D. Magnesium sulphate and other anticonvulsants for women with pre-eclampsia. *Cochrane Database Systematic Review* 2003;Issue 2.
  - 21 Magwali T, Chipato T, Majoko F, Rusakaniko S, Mujaji C. Prophylactic augmentin in
-

---

## References for Table A

---

- prelabor preterm rupture of the membranes. *Int J Gynaecol Obstet* 1999;65:261-265.
- 22 Kenyon S, Boulvain M, Neilson J. Antibiotics for preterm premature rupture of membranes (Cochrane Review). Oxford: Update Software, 2004.
- 23 Almeida L, Schmauch A, Bergstrom S. A randomised study on the impact of peroral amoxicillin in women with prelabour rupture of membranes preterm. *Gynecol Obstet Invest* 1996;82-84.
- 24 Crowley P. Prophylactic corticosteroids for preterm birth (Cochrane Review). *Cochrane Database Syst Rev*. Chichester, UK: John Wiley & Sons, Ltd., 2004.
- 25 Johanson, R.B. & Menon, B.K. Vacuum extraction versus forceps for assisted vaginal delivery. *Cochrane Database of Systematic Reviews*. (2): CD000224 (2000).
- 26 Hofmeyr, G.J. and R. Kulier, External cephalic version for breech presentation at term. *Cochrane Database of Systematic Reviews*., 2000(2):
- 27 Schuitemaker, N. et al. Maternal mortality after cesarean section in The Netherlands. *Acta Obstetrica et Gynecologica Scandinavica*. 76 (4): 332-4 (1997).
- 28 Hofmeyr, G.J. and M.E. Hannah, Planned Caesarean section for term breech delivery. *Cochrane Database of Systematic Reviews*., 2001(1)
- 29 French, L.M., Smaill, F.M. Antibiotic regimens for endometritis after delivery. *Cochrane Database of Systematic Reviews*., 2001(1)
- 30 Darmstadt GL, Bhutta ZA, Cousens S, Adam T, Walker N, de Bernis L. Evidence-based, cost-effective interventions: how many newborn babies can we save? *Lancet* 2005;365:977-88.
- 31 Augustine T, Bhatia B. Early neonatal morbidity and mortality pattern in hospitalized children. *Indian J Matern Child Health* 1994;5:17-19.
- 32 Habicht J, DaVanzo J, Butz W. Does breastfeeding really save lives, or are apparent benefits due to biases? *Am J Epidemiol* 1986;123:279-290.
- 33 WHO. Collaborative Study Team on the Role of Breastfeeding in the Prevention of Infant Mortality. Effect of breastfeeding on infant and child mortality due to infectious diseases in less developed countries: a pooled analysis. *Lancet* 2000;355:451-455.
- 34 Singh K, Srivastava P. The effect of colostrum on infant mortality: Urban rural differentials. *Health Pop* 1992;15:94-100.
- 35 Sikorski J, Renfrew MJ, Pindoria S, Wade A. Support for breastfeeding mothers: a systematic review. *Paediatr Perinat Epidemiol* 2003;17(4):407-17.
- 36 Lauer J, Betran A, Victora C, de Onis M, Barros A. Breastfeeding patterns and exposure to suboptimal breastfeeding among children in developing countries: review and analysis of nationally representative surveys. *BMC Medicine* 2004;2(1):26.
- 37 Lauer JA, Betrán AP, Barros AJD, de Onís M. Deaths and years of life lost due to suboptimal breastfeeding among children in the developing world: a global ecological risk assessment (submitted).
- 38 Charpak N, Ruiz-Pelaez J, Figueroa Cd, Charpak Y. Kangaroo mother versus traditional care for newborn infants <2000 grams: a randomized controlled trial. *Pediatrics* 1997;100:682-688.
- 39 Charpak N, Ruiz-Pelaez J, Figueroa Cd, Charpak Y. A randomized, controlled trial of kangaroo mother care: results of follow-up at 1 year of corrected age. *Pediatrics* 2001;108(5):1072-1079.
- 40 Charpak N, Ruiz-Pelaez J, Charpak Y. Rey-Martinez Kangaroo-mother programme: an alternative way of caring for low birth weight infants? One year mortality in a two cohort study. *Pediatrics* 1994;94(804-810).
- 41 Bergman N, Jurisoo L. The "kangaroo-method" for treating low birth weight babies in a developing country. *Trop Doct* 1994;24:57-60.
- 42 Kambarami R, Chidede O, Kowo D. Kangaroo care versus incubator care in the management of well preterm infants--A Pilot Study. *Ann Trop Paediatr* 1998;18(2):81-86.
- 43 Lincetto O, Nazir A, Cattaneo A. Kangaroo Mother Care with limited resources. *J Trop Pediatr* 2000;46:293-295.
- 44 Sazawal S, Black R. Meta-analysis of intervention trials on case management of pneumonia in community settings. *Lancet* 1992;340(8818):528-533.
- 45 Bang A, Bang R, Tale O, et al. Reduction in pneumonia mortality and total childhood

---

**References for Table A**

---

- mortality by means of community based intervention trial in Gadchiroli India. *Lancet* 1990;336:201-206.
- 46 Bang A, Bang R, Morankar V, Sontakke P, Solanki J. Pneumonia in neonates: can it be managed in the community? *Arch Dis Child* 1993;68:550-556.
- 47 Bang A, Bang R, Sontakke P. Management of childhood pneumonia by traditional birth attendants. The SEARCH Team. *Bull World Health Organ* 1994;72(6):897-905.
- 48 Sazawal S, Black R, Group PCMT. Effect of pneumonia case management on mortality in neonates, infants, and preschool children: a meta-analysis of community-based trials. *Lancet Infect Dis* 2003;3(9):547-556.
-

**Table B-i: [As supplied by authors] Coverage of antenatal care, tetanus toxoid and institutional delivery for Afr-E and Sear-D in 2000**

| Intervention (number)       | Afr-E | Sear-D | Source |
|-----------------------------|-------|--------|--------|
| Antenatal care (ANC)        | 76%   | 50%    | 1-2    |
| Tetanus toxoid              | 51%   | 77%    | 3      |
| Institutional delivery (ID) | 44%   | 28%    | 3      |

**Table B-ii: [As supplied by authors] Estimated coverage for remaining interventions in 2000**

| Intervention                                          | Estimated coverage* |
|-------------------------------------------------------|---------------------|
| <b>Antenatal care (ANC)</b>                           |                     |
| Screening & treatment of asymptomatic bacteriuria     | ANC coverage x 0.2  |
| Other ANC interventions                               | ANC coverage x 0.5  |
| <b>Institutional delivery (ID)</b>                    |                     |
| Neonatal resuscitation                                | ID coverage x 0.2   |
| Antibiotics for pPROM                                 | ID coverage x 0.5   |
| Referral care of neonatal sepsis                      | ID coverage x 0.7   |
| Other skilled attendant & referral care interventions | ID coverage x 0.5   |

\* Based on expert panel estimates for effective coverage of these interventions in the base year (2000).

### References for Table B

1 UNICEF Global Database - Antenatal care: <http://www.childinfo.org/eddb/antenatal/database1.htm>

2 The State of the World's Children 2004: <http://www.unicef.org/files/Table8.pdf>

3 Weighted average for the WHO sub-region from the Demographic and Health Surveys (DHS): <http://www.measure>



**Table C: [As supplied by authors] Epidemiological sub-regions as applied in WHO-CHOICE**

| WHO region | Mortality stratum | WHO Member States                                                                                                                                                                                                                                                                   |
|------------|-------------------|-------------------------------------------------------------------------------------------------------------------------------------------------------------------------------------------------------------------------------------------------------------------------------------|
| Afr        | D                 | Algeria, Angola, Benin, Burkina Faso, Cameroon, Cape Verde, Chad, Comoros, Equatorial Guinea, Gabon, Gambia, Ghana, Madagascar, Mali, Mauritania, Mauritius, Niger, Nigeria, Sao Tome And Principe, Senegal, Seychelles, Sierra Leone, Togo                                         |
| Afr        | E                 | Botswana, Burundi, Central African Republic, Congo, Côte d'Ivoire, Democratic Republic Of The Congo, Eritrea, Ethiopia, Mozambique, Namibia, Rwanda, South Africa, Swaziland, Uganda, United Republic of Tanzania, Zambia, Zimbabwe                                                 |
| Amr        | A                 | Canada, United States Of America, Cuba                                                                                                                                                                                                                                              |
| Amr        | B                 | Antigua And Barbuda, Argentina, Bahamas, Barbados, Belize, Brazil, Chile, Colombia, Costa Rica, Dominica, Dominican Republic, Guyana, Honduras, Jamaica, Mexico, Panama, Paraguay, Saint Kitts And Nevis, Saint Lucia, Saint Vincent And The Grenadines, Tobago, Uruguay, Venezuela |
| Amr        | D                 | Bolivia, Ecuador, Guatemala, Haiti, Nicaragua, Peru                                                                                                                                                                                                                                 |
| Emr        | B                 | Bahrain, Cyprus, Iran (Islamic Republic Of), Jordan, Kuwait, Lebanon, Libyan Arab Jamahiriya, Oman, Qatar, Saudi Arabia, United Arab Emirates                                                                                                                                       |
| Emr        | D                 | Afghanistan, Djibouti, Egypt, Iraq, Morocco, Pakistan, Somalia, Sudan, Yemen                                                                                                                                                                                                        |
| Eur        | A                 | Andorra, Austria, Belgium, Croatia, Czech Republic, Denmark, Finland, France, Germany, Greece, Iceland, Ireland, Israel, Monaco, Netherlands, Norway, Portugal, San Marino, Slovenia, Spain, Sweden, Switzerland, United Kingdom                                                    |
| Eur        | B                 | Albania, Armenia, Azerbaijan, Bosnia And Herzegovina, Bulgaria, Georgia, Kyrgyzstan, Poland, Romania, Slovakia, Tajikistan, Republic Of Macedonia, Turkey, Turkmenistan, Uzbekistan, Yugoslavia                                                                                     |
| Eur        | C                 | Belarus, Estonia, Hungary, Kazakhstan, Latvia, Lithuania, Republic of Moldova, Russian Federation, Ukraine                                                                                                                                                                          |
| Sear       | B                 | Indonesia, Sri Lanka, Thailand                                                                                                                                                                                                                                                      |
| Sear       | D                 | Bangladesh, Bhutan, Democratic People's Republic Of Korea, India, Maldives, Myanmar, Nepal                                                                                                                                                                                          |
| Wpr        | A                 | Australia, Japan, Brunei Darussalam, New Zealand, Singapore                                                                                                                                                                                                                         |
| Wpr        | B                 | Cambodia, China, Lao People's Democratic Republic, Malaysia, Mongolia, Philippines, Republic Of Korea, Viet Nam, Cook Islands, Micronesia (Federated States Of), Nauru, Niue, Palau, Papua New Guinea, Samoa, Solomon Islands, Tonga, Tuvalu                                        |

**Table D: [As supplied by authors] Data sources for causes of death and incidence, prevalence, remission and case-fatality of associated sequelae included in the effectiveness model**

| Cause of death                          | Associated sequelae        | Source              |
|-----------------------------------------|----------------------------|---------------------|
| <b>Neonatal outcomes</b>                |                            |                     |
| Tetanus                                 | Not included               | GBD 2000, Version 3 |
| Infection                               | Not included               | GBD 2000, Version 3 |
| Asphyxia                                | Not included               | GBD 2000, Version 3 |
| Diarrhea                                | Not included               | GBD 2000, Version 3 |
| Congenital                              | Not included               | GBD 2000, Version 3 |
| Preterm                                 | Not included               | GBD 2000, Version 3 |
| <b>Maternal outcomes</b>                |                            |                     |
| Post-partum haemorrhage                 | Severe post-partum anaemia | GBD 2000, Version 3 |
| Maternal sepsis                         | Infertility due to sepsis  | GBD 2000, Version 3 |
| Hypertensive disorders during pregnancy | Not included               | GBD 2000, Version 3 |
| Obstructed Labour                       | Urinary incontinence       | GBD 2000, Version 3 |
|                                         | Obstetric fistula          | GBD 2000, Version 3 |

**Table E: [As supplied by authors] Main assumption on resources used for patient costs**

| No.                                          | Intervention                                               | Description                                                                                                                                                                                     | Number of visits/<br>bed days <sup>1</sup>          | Regimen as<br>applicable                               |
|----------------------------------------------|------------------------------------------------------------|-------------------------------------------------------------------------------------------------------------------------------------------------------------------------------------------------|-----------------------------------------------------|--------------------------------------------------------|
| <b>Primary-level care including outreach</b> |                                                            |                                                                                                                                                                                                 |                                                     |                                                        |
|                                              | <i>Selected antenatal interventions</i>                    | <i>Combination of Interventions 1-4, including history &amp; physical examination, plus referral in case of any complication.(Referral costs included in referral care interventions)</i>       | 3 outpatient/outreach visits                        | See below                                              |
| 1                                            | Tetanus toxoid                                             | Two tetanus toxoid immunizations                                                                                                                                                                | 2 visits                                            | Two tetanus toxoid immunizations                       |
| 2                                            | Screening for pre-eclampsia                                | Blood pressure measurement for all pregnant women and urine examination for proteinuria and pre-referral care of pre-eclampsia and eclampsia                                                    | 3 visits                                            |                                                        |
| 3                                            | Screening & treatment of asymptomatic bacteruria           | Screening of urine of all pregnant women at antenatal visits and treatment of identified cases with amoxicillin.                                                                                | 1 visit                                             | amoxicillin 500 mg TID orally for 3 days.              |
| 4                                            | Screening & treatment of syphilis                          | Screening of all pregnant women by RPR test and treatment of identified cases of syphilis with benzathine penicillin.                                                                           | 1 visit                                             | benzathine penicillin 2.4 million units (MU) injection |
|                                              | <i>Skilled maternal and immediate newborn care package</i> | <i>Combination of Interventions 5 to 8. Includes general examination and recognition of delivery complications like obstructed labour, pre-eclampsia and immediate referral as appropriate.</i> | See below                                           | See below                                              |
| 5                                            | Normal delivery by skilled attendant                       | Includes safe delivery, cord care, identification of complications, first aid and referral of complicated cases                                                                                 |                                                     |                                                        |
| 6                                            | Active management of the third stage of labour             | Administration of a prophylactic oxytocic, cord clamping and delivery of the placenta by controlled cord traction                                                                               |                                                     | Inj Oxytocin 10 IU IM                                  |
| 7                                            | Initial management of post-partum haemorrhage              | Management of postpartum haemorrhage (PPH) with additional                                                                                                                                      | 3 inpatient days (secondary level hospital) for all | IV fluids, oxytocin, manual removal of                 |

| No.                        | Intervention                                                     | Description                                                                                                                                                                                                                                  | Number of visits/<br>bed days <sup>1</sup>                                                                                                                               | Regimen as<br>applicable                                                                                                                                                                                                                                                                                                                       |
|----------------------------|------------------------------------------------------------------|----------------------------------------------------------------------------------------------------------------------------------------------------------------------------------------------------------------------------------------------|--------------------------------------------------------------------------------------------------------------------------------------------------------------------------|------------------------------------------------------------------------------------------------------------------------------------------------------------------------------------------------------------------------------------------------------------------------------------------------------------------------------------------------|
| 8                          | Neonatal resuscitation                                           | oxytocin, uterine massage, manual removal of placenta, repair of lacerations and management of shock. Detection of breathing problems and where required resuscitation of the newborn.                                                       | referred cases – assumed to be 20% of all cases with PPH.                                                                                                                | placenta, suturing of genital lacerations                                                                                                                                                                                                                                                                                                      |
| <b>Referral-level care</b> |                                                                  |                                                                                                                                                                                                                                              |                                                                                                                                                                          |                                                                                                                                                                                                                                                                                                                                                |
| 9                          | Treatment of severe pre-eclampsia/eclampsia*                     | Inpatient care including airway management, treatment with magnesium sulphate, antihypertensives and birth care when undelivered                                                                                                             | 3 bed days for eclampsia and severe pre-eclampsia plus referral costs                                                                                                    | initial dose of MgSO <sub>4</sub> (20%) 4 g IV or 2 x IM injections 5 g MgSO <sub>4</sub> (50%). Then IM injection 5 g of MgSO <sub>4</sub> (50%) every 4 hours until delivery (assume 1.5 days, i.e., 9 injections). Assume that 75% of severe PIH/eclampsia cases also require antihypertensives using nifedepine 10 mg 8-hourly for 3 days. |
| 10                         | Antibiotics for pre-term premature rupture of membranes (pPROM)* | Administration of oral antibiotics to women with pre-term prelabour rupture of membranes and care during labour.                                                                                                                             | 1 visit for diagnosis then referral, 3 inpatient days and assume vaginal delivery. Referral costs included.                                                              | erythromycin 250 mg QID orally.                                                                                                                                                                                                                                                                                                                |
| 11                         | Steroids for pre-term births*                                    | Administration of antenatal and intrapartum steroids and inpatient care of women with suspected preterm labour                                                                                                                               | 1 visit for diagnosis than referral, 3 inpatient days and assume vaginal delivery. Referral costs included.                                                              | betamethasone 12 mg BID injection 24 hours apart to all women in preterm labour.                                                                                                                                                                                                                                                               |
| 12                         | Management of obstructed labour, breech and fetal distress (OL)* | External cephalic version for breech presentation. Management of obstructed labour, persistent breech presentation and fetal distress by operative delivery (vacuum extraction, forceps and vaginal breech delivery, and Caesarean section). | Assume 15% require referral and 5% Caesarean section (CS). All CS take prophylactic antibiotics. 1/3 requiring CS stay for 3 days and remaining 2/3 stay 2 days (primary | ampicillin 2 g injection.                                                                                                                                                                                                                                                                                                                      |

| No.                                           | Intervention                                        | Description                                                                                                                                                   | Number of visits/<br>bed days <sup>1</sup>                                                                             | Regimen as<br>applicable                                                                                                                 |
|-----------------------------------------------|-----------------------------------------------------|---------------------------------------------------------------------------------------------------------------------------------------------------------------|------------------------------------------------------------------------------------------------------------------------|------------------------------------------------------------------------------------------------------------------------------------------|
|                                               |                                                     |                                                                                                                                                               | hospital). Incidence of shock, hysterectomy and blood transfusion was 0.005. referral costs included                   |                                                                                                                                          |
| 13                                            | Management of severe post-partum haemorrhage (PPH)* | Inpatient care of post-partum haemorrhage, including blood transfusion, treatment for shock and hysterectomy.                                                 |                                                                                                                        |                                                                                                                                          |
| 14                                            | Management of maternal sepsis*                      | Inpatient care of maternal sepsis including treatment with intravenous/intramuscular antibiotics.                                                             | 7 inpatient days (primary hospital)-include diagnosis visit and referral costs                                         | ampicillin 2 gm QID injection and gentamicin 160 to 240 mg injection OD plus metronidazole 500 mg Q8H . IV fluids: 4 L of Normal Saline. |
|                                               | <i>Emergency neonatal care (ENC)</i>                | <i>Combination of Interventions 20 to 23.</i>                                                                                                                 | See below                                                                                                              | See below                                                                                                                                |
| 15                                            | Management of very low birth weight babies*         | Inpatient care for very low birth weight babies including special feeding support, additional warmth, close monitoring and treatment with oxygen if necessary | 5 inpatient days (secondary hospital) , % of babies admitted vary by region-include diagnosis visit and referral costs | oxygen for 2 days.                                                                                                                       |
| 16                                            | Management of severe neonatal infections*           | Inpatient care for severe neonatal infections including treatment with intravenous antibiotics                                                                | 7 days (primary hospital) for 8% of babies--include diagnosis visit and referral                                       | ampicillin 75 mg TID injections plus gentamicin 10 mg BID injections and assume weight of 3.5-4 kg                                       |
| 17                                            | Management of severe neonatal asphyxia*             | Inpatient care for neonatal encephalopathy including treatment with oxygen                                                                                    | 5 inpatient days (secondary hospital) for 1% of babies-include diagnosis visit and referral                            |                                                                                                                                          |
| 18                                            | Management of neonatal jaundice*                    | Inpatient care for severe neonatal jaundice including phototherapy                                                                                            | 4 inpatient days (secondary hospital) for 1% of babies-include diagnosis visit and referral costs                      | phototherapy using light bulbs for 2 days, blood transfusion (average 100 cc) for 20.1% of all babies.                                   |
| <b>Community-based newborn follow up care</b> |                                                     |                                                                                                                                                               |                                                                                                                        |                                                                                                                                          |
|                                               | <i>Community-based newborn package</i>              | <i>Combination of interventions 19 and 20. based on home visits, including education</i>                                                                      | 1 antenatal home visit and 2 postnatal visits of 1 hour each                                                           |                                                                                                                                          |

| No. | Intervention                                           | Description                                                                                                                                                           | Number of visits/<br>bed days <sup>1</sup>                                                                  | Regimen as<br>applicable                   |
|-----|--------------------------------------------------------|-----------------------------------------------------------------------------------------------------------------------------------------------------------------------|-------------------------------------------------------------------------------------------------------------|--------------------------------------------|
|     |                                                        | for birth preparedness and improved care-seeking, provided by skilled care providers and community health workers                                                     | for all pregnant/deliveries.<br>Additional 2 visits (1 hour each) for LBW babies (incidence vary by region) |                                            |
| 19  | Support for breastfeeding mothers                      | Home visits to promote early and exclusive breastfeeding provided by skilled care providers and community health workers                                              | 3 home visits (1 hour each)                                                                                 |                                            |
| 20  | Support for low birth weight babies                    | Home visits for low birth weight babies to promote extra warmth and support for breastfeeding mothers provided by skilled care providers and community health workers | 4 postnatal home visits (1 hour each) targeting LBW babies (incidence vary by region)                       |                                            |
| 21  | Community-based case management for neonatal pneumonia | Home visits for diagnosis and management of pneumonia in neonates and treatment with oral antibiotic therapy provided by community health workers.                    | 2 home visits by community health worker                                                                    | cotrimoxazole 10 mg BID orally for 5 days. |

1. <sup>1</sup> unit costs are based on WHO-CHOICE estimates (Adam T, Evans DB, Murray CJL. Econometric estimation of country-specific hospital costs. *Cost Eff Resour Alloc* 2003;1:3.

\* includes transportation costs for referral-level care
