# Supplementary material
Source: PubMed Central journal article supplement (PMC1283271)
Supplement: bmj_331_7525_1107__2.pdf [file bmj_331_7525_1107__2.pdf]

**Table F: [As supplied by authors] Annual costs, effects and cost-effectiveness of interventions for Afr-E in 2000**

| No. | Description of intervention                                                                                                                                                                         | Yearly Costs (millions Int\$) |           |          |            | Yearly DALYs averted (millions) | ACER (Int\$ per DALY averted) | ICER (Int\$ per DALY averted) |
|-----|-----------------------------------------------------------------------------------------------------------------------------------------------------------------------------------------------------|-------------------------------|-----------|----------|------------|---------------------------------|-------------------------------|-------------------------------|
|     |                                                                                                                                                                                                     | Patient                       | Programme | Training | Total Cost |                                 |                               |                               |
| 1   | Community newborn care package (95%)                                                                                                                                                                | \$46                          | \$15      | \$1      | \$62       | 7.1                             | \$9                           | Dominated                     |
| 2   | Support for breastfeeding mothers (95%)                                                                                                                                                             | \$49                          | \$15      | \$0      | \$64       | 6.0                             | \$11                          | Dominated                     |
| 3   | Pre-eclampsia screening (95%)                                                                                                                                                                       | \$52                          | \$1       | \$12     | \$65       | 0.7                             | \$99                          | Dominated                     |
| 4   | Tetanus toxoid (95%)                                                                                                                                                                                | \$54                          | \$1       | \$12     | \$67       | 3.1                             | \$22                          | Dominated                     |
| 5   | Screening & treatment of asymptomatic bacteriuria (95%)                                                                                                                                             | \$27                          | \$1       | \$12     | \$40       | 0.3                             | \$117                         | Dominated                     |
| 6   | Screening & treatment of syphilis (95%)                                                                                                                                                             | \$28                          | \$1       | \$12     | \$41       | 0.3                             | \$146                         | Dominated                     |
| 7   | Normal delivery by a skilled attendant (95%)                                                                                                                                                        | \$96                          | \$1       | \$18     | \$115      | 2.8                             | \$42                          | Dominated                     |
| 8   | Community-based case management for neonatal pneumonia (95%)                                                                                                                                        | \$1                           | \$0       | \$0      | \$1        | 1.5                             | \$1                           | \$1                           |
| 9   | Normal delivery by a skilled attendant + Tetanus Toxoid (95%)                                                                                                                                       | \$150                         | \$1       | \$20     | \$171      | 4.2                             | \$41                          | Dominated                     |
| 10  | Management of maternal sepsis (95%)                                                                                                                                                                 | \$74                          | \$1       | \$       | \$75       | 0.6                             | \$128                         | Dominated                     |
| 11  | Management of severe neonatal asphyxia (95%)                                                                                                                                                        | \$14                          | \$1       | \$18     | \$34       | 0.1                             | \$387                         | Dominated                     |
| 12  | Management of serious newborn infections (95%)                                                                                                                                                      | \$120                         | \$1       | \$18     | \$139      | 1.8                             | \$77                          | Dominated                     |
| 13  | Management of very low birth weight babies (95%)                                                                                                                                                    | \$22                          | \$1       | \$18     | \$41       | 0.7                             | \$63                          | Dominated                     |
| 14  | Management of neonatal jaundice (95%)                                                                                                                                                               | \$14                          | \$1       | \$18     | \$33       | 0.0                             | \$1,235                       | Dominated                     |
| 15  | Tetanus toxoid + Pre-eclampsia screening (95%)                                                                                                                                                      | \$81                          | \$2       | \$12     | \$94       | 3.7                             | \$25                          | Dominated                     |
| 16  | Tetanus toxoid + Asymptomatic bacteriuria screening screening + Pre-eclampsia screening (95%)                                                                                                       | \$81                          | \$3       | \$13     | \$97       | 4.1                             | \$24                          | Dominated                     |
| 17  | Tetanus toxoid + Asymptomatic bacteriuria screening screening + Pre-eclampsia screening + Syphilis screening (95%)                                                                                  | \$83                          | \$4       | \$15     | \$102      | 4.3                             | \$23                          | Dominated                     |
| 18  | Tetanus toxoid + Normal delivery by a skilled attendant + Active management + Initial PPH treatment (95%)                                                                                           | \$157                         | \$3       | \$23     | \$183      | 5.1                             | \$36                          | Dominated                     |
| 19  | Tetanus toxoid + Normal delivery by a skilled attendant + Resuscitation (95%)                                                                                                                       | \$151                         | \$3       | \$21     | \$175      | 5.3                             | \$33                          | Dominated                     |
| 20  | Tetanus toxoid + Normal delivery by a skilled attendant + Management of OL (95%)                                                                                                                    | \$312                         | \$3       | \$20     | \$334      | 5.4                             | \$62                          | Dominated                     |
| 21  | Tetanus toxoid + Normal delivery by a skilled attendant + Active management + Initial PPH treatment + Referral PPH treatment (95%)                                                                  | \$176                         | \$3       | \$23     | \$202      | 5.2                             | \$39                          | Dominated                     |
| 22  | Tetanus toxoid + Normal delivery by a skilled attendant + Antibiotics pPROM (95%)                                                                                                                   | \$188                         | \$3       | \$21     | \$212      | 4.4                             | \$48                          | Dominated                     |
| 23  | Tetanus toxoid + Normal delivery by a skilled attendant + Steroids for pre-term (95%)                                                                                                               | \$263                         | \$3       | \$21     | \$288      | 5.2                             | \$56                          | Dominated                     |
| 24  | Tetanus toxoid + Normal delivery by a skilled attendant + Treatment of severe PEE (95%)                                                                                                             | \$192                         | \$1       | \$20     | \$213      | 4.9                             | \$44                          | Dominated                     |
| 25  | Management of vLBW + Management of serious newborn infections (95%)                                                                                                                                 | \$142                         | \$3       | \$18     | \$163      | 2.5                             | \$66                          | Dominated                     |
| 26  | Management of vLBW + Management of serious newborn infections + Severe asphyxia (95%)                                                                                                               | \$156                         | \$3       | \$18     | \$177      | 2.6                             | \$69                          | Dominated                     |
| 27  | Emergency neonatal care (95%)                                                                                                                                                                       | \$170                         | \$4       | \$18     | \$192      | 3.2                             | \$61                          | Dominated                     |
| 28  | ENC + Management of maternal sepsis (95%)                                                                                                                                                           | \$254                         | \$6       | \$18     | \$278      | 3.2                             | \$87                          | Dominated                     |
| 29  | Skilled maternal and immediate newborn care (95%)                                                                                                                                                   | \$103                         | \$5       | \$23     | \$131      | 4.8                             | \$27                          | Dominated                     |
| 30  | Community newborn care package + Community-based pneumonia (95%)                                                                                                                                    | \$47                          | \$9       | \$2      | \$58       | 8.6                             | \$7                           | \$8                           |
| 31  | Tetanus toxoid + Asymptomatic bacteriuria screening screening + Pre-eclampsia screening + Syphilis screening + Normal delivery by a skilled attendant (95%)                                         | \$179                         | \$7       | \$23     | \$210      | 5.4                             | \$39                          | Dominated                     |
| 32  | Tetanus toxoid+Asymptomatic bacteriuria screening+Pre-eclampsia screening+Syphilis screening+Normal delivery by a skilled attendant+Treatment of severe PEE                                         | \$202                         | \$7       | \$23     | \$232      | 5.9                             | \$39                          | Dominated                     |
| 33  | Tetanus toxoid + Asymptomatic bacteriuria screening + Pre-eclampsia screening+ Syphilis screening + Normal delivery by a skilled attendant + Maternal sepsis referral (95%)                         | \$221                         | \$7       | \$23     | \$251      | 5.7                             | \$44                          | Dominated                     |
| 34  | Tetanus toxoid + Asymptomatic bacteriuria screening + Pre-eclampsia screening+ Syphilis screening + Normal delivery by a skilled attendant + Neonatal sepsis referral (95%)                         | \$298                         | \$7       | \$29     | \$334      | 6.9                             | \$48                          | Dominated                     |
| 35  | Tetanus toxoid + Asymptomatic bacteriuria screening + Pre-eclampsia screening+ Syphilis screening + Normal delivery by a skilled attendant + antibiotics for pPROM + Maternal sepsis referral (95%) | \$255                         | \$7       | \$23     | \$285      | 5.9                             | \$48                          | Dominated                     |

| No. | Description of intervention                                                                                                                                                                         | Yearly Costs (millions Int\$) |           |          |            | Yearly DALYs averted (millions) | ACER (Int\$ per DALY averted) | ICER (Int\$ per DALY averted) |
|-----|-----------------------------------------------------------------------------------------------------------------------------------------------------------------------------------------------------|-------------------------------|-----------|----------|------------|---------------------------------|-------------------------------|-------------------------------|
|     |                                                                                                                                                                                                     | Patient                       | Programme | Training | Total Cost |                                 |                               |                               |
| 36  | Tetanus toxoid + Asymptomatic bacteriuria screening + Pre-eclampsia screening+ Syphilis screening + Normal delivery by a skilled attendant + antibiotics for pPROM + Neonatal sepsis referral (95%) | \$344                         | \$7       | \$29     | \$380      | 7.0                             | \$54                          | Dominated                     |
| 37  | Community newborn care package + Tetanus Toxoid (95%)                                                                                                                                               | \$100                         | \$16      | \$12     | \$129      | 10.1                            | \$13                          | Dominated                     |
| 38  | Community-based pneumonia + Tetanus Toxoid (95%)                                                                                                                                                    | \$55                          | \$2       | \$12     | \$68       | 4.5                             | \$15                          | Dominated                     |
| 39  | Community-based pneumonia + ANC (95%)                                                                                                                                                               | \$83                          | \$5       | \$15     | \$103      | 5.8                             | \$18                          | Dominated                     |
| 40  | Community newborn care package + Tetanus Toxoid + Community-based pneumonia (95%)                                                                                                                   | \$101                         | \$10      | \$13     | \$125      | 11.6                            | \$11                          | \$22                          |
| 41  | Support for breastfeeding mothers + Tetanus toxoid (95%)                                                                                                                                            | \$103                         | \$16      | \$12     | \$131      | 9.0                             | \$14                          | Dominated                     |
| 42  | Community newborn care package + ANC (95%)                                                                                                                                                          | \$129                         | \$19      | \$15     | \$164      | 11.4                            | \$14                          | Dominated                     |
| 43  | Community newborn care package + ANC + Community-based pneumonia (95%)                                                                                                                              | \$130                         | \$14      | \$16     | \$160      | 12.9                            | \$12                          | \$27                          |
| 44  | Community newborn care package + ANC + Community-based pneumonia + SMNC (95%)                                                                                                                       | \$233                         | \$20      | \$30     | \$284      | 16.0                            | \$18                          | \$40                          |
| 45  | Community newborn care package + ANC + Community-based pneumonia + Management of vLBW (95%)                                                                                                         | \$152                         | \$15      | \$34     | \$201      | 13.5                            | \$15                          | Dominated                     |
| 46  | Community newborn care package + ANC + Community-based pneumonia + SMNC + Treatment of severe PEE + Referral PPH + Maternal sepsis + Antibiotics pPROM (95%)                                        | \$354                         | \$22      | \$32     | \$407      | 17.1                            | \$24                          | Dominated                     |
| 47  | Community newborn care package + ANC + Community-based pneumonia + SMNC + Management of vLBW (95%)                                                                                                  | \$255                         | \$22      | \$48     | \$325      | 16.6                            | \$20                          | Dominated                     |
| 48  | Community newborn care package + ANC + Community-based pneumonia + SMNC + Treatment of severe PEE (95%)                                                                                             | \$255                         | \$20      | \$30     | \$306      | 16.5                            | \$19                          | \$42                          |
| 49  | Community newborn care package + ANC + Community-based pneumonia + SMNC + Treatment of severe PEE + Steroids pre-term (95%)                                                                         | \$368                         | \$22      | \$32     | \$423      | 17.5                            | \$24                          | Dominated                     |
| 50  | Community newborn care package + ANC + Community-based pneumonia + SMNC + Treatment of severe PEE + Management of OL (95%)                                                                          | \$417                         | \$22      | \$30     | \$469      | 17.7                            | \$26                          | Dominated                     |
| 51  | Community newborn care package + ANC + Community-based pneumonia + SMNC + Treatment of severe PEE + ENC (95%)                                                                                       | \$425                         | \$25      | \$48     | \$498      | 19.6                            | \$25                          | \$61                          |
| 52  | Community newborn care package + ANC + Community-based pneumonia + SMNC + Treatment of severe PEE (95%)                                                                                             | \$255                         | \$20      | \$30     | \$306      | 16.5                            | \$19                          | Dominated                     |
| 53  | Community newborn care package + ANC + Community-based pneumonia + SMNC + Treatment of severe PEE + Referral PPH + Maternal sepsis + Management of OL (95%)                                         | \$478                         | \$22      | \$30     | \$530      | 18.2                            | \$29                          | Dominated                     |
| 54  | Community newborn care package + ANC + Community-based pneumonia + SMNC + Treatment of severe PEE + Management of vLBW (95%)                                                                        | \$277                         | \$22      | \$48     | \$347      | 17.1                            | \$20                          | Dominated                     |
| 55  | Community newborn care package + ANC + Community-based pneumonia + Asymptomatic bacteriuria screening + Community-based pneumonia (95%)                                                             | \$128                         | \$12      | \$15     | \$155      | 12.6                            | \$12                          | Dominated                     |
| 56  | Community newborn care package + ANC + Community-based pneumonia + SMNC + Treatment of severe PEE + ENC (95%)                                                                                       | \$425                         | \$25      | \$48     | \$498      | 19.6                            | \$25                          | Dominated                     |
| 57  | Community newborn care package + ANC + Community-based pneumonia + SMNC + Treatment of severe PEE + Management of OL (95%)                                                                          | \$417                         | \$22      | \$30     | \$469      | 17.7                            | \$26                          | Dominated                     |
| 58  | Community newborn care package + Tetanus Toxoid + Pre-eclampsia screening + Asymptomatic bacteriuria screening (95%)                                                                                | \$127                         | \$18      | \$14     | \$159      | 11.1                            | \$14                          | Dominated                     |
| 59  | Community newborn care package + ANC + SMNC + Treatment of severe PEE + PPH referral + Community-based pneumonia + Maternal sepsis + ENC (95%)                                                      | \$486                         | \$22      | \$48     | \$556      | 20.1                            | \$28                          | Dominated                     |
| 60  | Community newborn care package + ANC + Community-based pneumonia + SMNC + Treatment of severe PEE + Management of OL + Steroids pre-term (95%)                                                      | \$459                         | \$22      | \$32     | \$514      | 18.7                            | \$27                          | Dominated                     |
| 61  | Community newborn care package + ANC + Community-based pneumonia + SMNC + Treatment of severe PEE + Management of OL + Referral PPH (95%)                                                           | \$366                         | \$20      | \$30     | \$416      | 17.8                            | \$23                          | Dominated                     |
| 62  | Community newborn care package + ANC + Community-based pneumonia + SMNC + Treatment of severe PEE + Management of OL + Management of maternal sepsis (95%)                                          | \$388                         | \$20      | \$30     | \$439      | 18.1                            | \$24                          | Dominated                     |
| 63  | Community newborn care package + ANC + Community-based pneumonia + SMNC + Treatment of severe PEE + Management of OL + Antibiotics pPROM                                                            | \$384                         | \$22      | \$32     | \$437      | 17.9                            | \$24                          | Dominated                     |

| No. | Description of intervention                                                                                                                                                                                                                | Yearly Costs (millions Int\$) |           |          |            | Yearly DALYs averted (millions) | ACER (Int\$ per DALY averted) | ICER (Int\$ per DALY averted) |
|-----|--------------------------------------------------------------------------------------------------------------------------------------------------------------------------------------------------------------------------------------------|-------------------------------|-----------|----------|------------|---------------------------------|-------------------------------|-------------------------------|
|     |                                                                                                                                                                                                                                            | Patient                       | Programme | Training | Total Cost |                                 |                               |                               |
| 64  | (95%)<br>Community newborn care package + ANC + Community-based pneumonia + SMNC + Treatment of severe PEE + Management of OL + ENC (95%)                                                                                                  | \$517                         | \$25      | \$48     | \$589      | 20.9                            | \$28                          | \$73                          |
| 65  | Community newborn care package + ANC + Community-based pneumonia + SMNC + Treatment of severe PEE + Management of OL + ENC + Steroids pre-term (95%)                                                                                       | \$629                         | \$27      | \$50     | \$706      | 21.9                            | \$32                          | \$117                         |
| 66  | Community newborn care package + Tetanus Toxoid + Normal delivery by a skilled attendant + Active management and initial treatment of PPH (95%)                                                                                            | \$203                         | \$18      | \$24     | \$245      | 12.1                            | \$20                          | Dominated                     |
| 67  | Community newborn care package + Tetanus Toxoid + Pre-eclampsia screening + Asymptomatic bacteriuria screening + SMNC + Treatment of severe PEE + PPH referral + Community-based pneumonia + Maternal sepsis + ENC (95%)                   | \$484                         | \$21      | \$46     | \$551      | 19.8                            | \$28                          | Dominated                     |
| 68  | Community newborn care package + ANC + ENC + SMNC + Treatment of severe PEE + Management of OL + Steroids pre-term + Community-based pneumonia care (95%)                                                                                  | \$629                         | \$27      | \$50     | \$706      | 21.9                            | \$32                          | Dominated                     |
| 69  | Community newborn care package + ANC + ENC + SMNC + Treatment of severe PEE + Management of OL + Maternal sepsis + Community-based pneumonia care (95%)                                                                                    | \$558                         | \$25      | \$48     | \$631      | 21.2                            | \$30                          | Dominated                     |
| 70  | Community newborn care package + ANC + ENC + SMNC + Treatment of severe PEE + Management of OL + PPH referral + Community-based pneumonia care (95%)                                                                                       | \$536                         | \$25      | \$48     | \$609      | 21.0                            | \$29                          | Dominated                     |
| 71  | Community newborn care package + ANC + ENC + SMNC + Treatment of severe PEE + Management of OL + Steroids pre-term + Maternal sepsis + Community-based pneumonia care (95%)                                                                | \$671                         | \$27      | \$50     | \$748      | 22.2                            | \$34                          | \$125                         |
| 72  | Community newborn care package + ANC + ENC + SMNC + Treatment of severe PEE + Management of OL + Steroids pre-term + PPH referral + Community-based pneumonia care (95%)                                                                   | \$649                         | \$27      | \$50     | \$725      | 22.0                            | \$33                          | Dominated                     |
| 73  | Community newborn care package + ANC + ENC + SMNC + Treatment of severe PEE + Management of OL + Steroids pre-term + Antibiotics pPROM + Community-based pneumonia care (95%)                                                              | \$667                         | \$28      | \$52     | \$746      | 22.1                            | \$34                          | Dominated                     |
| 74  | Community newborn care package + ANC + ENC + SMNC + Treatment of severe PEE + Management of OL + Steroids pre-term + Maternal sepsis + Antibiotics pPROM + Community-based pneumonia care (95%)                                            | \$705                         | \$27      | \$50     | \$781      | 22.4                            | \$35                          | \$178                         |
| 75  | Community newborn care package + ANC + ENC + SMNC + Treatment of severe PEE + Management of OL + Steroids pre-term + Maternal sepsis + PPH referral + Community-based pneumonia care (95%)                                                 | \$690                         | \$27      | \$50     | \$767      | 22.3                            | \$34                          | Dominated                     |
| 76  | Community newborn care package + ANC + ENC + SMNC + Treatment of severe PEE + Management of OL + Steroids pre-term + Maternal sepsis + Antibiotics pPROM + PPH referral + Community-based pneumonia care (95%)                             | \$724                         | \$27      | \$50     | \$801      | 22.5                            | \$36                          | \$223                         |
| 77  | Community newborn care package + Tetanus Toxoid + SMNC (95%)                                                                                                                                                                               | \$203                         | \$20      | \$26     | \$249      | 13.2                            | \$19                          | Dominated                     |
| 78  | Community newborn care package + Tetanus Toxoid + Normal delivery by a skilled attendant + Active management and initial treatment of PPH + Community-based pneumonia (95%)                                                                | \$204                         | \$12      | \$25     | \$241      | 13.6                            | \$18                          | Dominated                     |
| 79  | Community newborn care package + Tetanus Toxoid + SMNC + Community-based pneumonia (95%)                                                                                                                                                   | \$204                         | \$14      | \$27     | \$245      | 14.7                            | \$17                          | Dominated                     |
| 80  | Community newborn care package + Tetanus Toxoid + Pre-eclampsia screening + Asymptomatic bacteriuria screening + Normal delivery by a skilled attendant + Active management and initial treatment of PPH (95%)                             | \$230                         | \$20      | \$25     | \$275      | 13.1                            | \$21                          | Dominated                     |
| 81  | Community newborn care package + Tetanus Toxoid + Pre-eclampsia screening + Asymptomatic bacteriuria screening + Normal delivery by a skilled attendant + Active management and initial treatment of PPH + Community-based pneumonia (95%) | \$231                         | \$14      | \$26     | \$272      | 14.6                            | \$19                          | Dominated                     |
| 82  | Community newborn care package + Tetanus Toxoid + Pre-eclampsia screening + Asymptomatic bacteriuria screening + Normal delivery by a skilled attendant + Active management and initial treatment of PPH + Management of OL (95%)          | \$321                         | \$20      | \$25     | \$367      | 14.4                            | \$25                          | Dominated                     |

| No. | Description of intervention                                                                                                                                                                                                                                   | Yearly Costs (millions Int\$) |           |          |            | Yearly DALYs averted (millions) | ACER (Int\$ per DALY averted) | ICER (Int\$ per DALY averted) |
|-----|---------------------------------------------------------------------------------------------------------------------------------------------------------------------------------------------------------------------------------------------------------------|-------------------------------|-----------|----------|------------|---------------------------------|-------------------------------|-------------------------------|
|     |                                                                                                                                                                                                                                                               | Patient                       | Programme | Training | Total Cost |                                 |                               |                               |
| 83  | Community newborn care package + Tetanus Toxoid + Pre-eclampsia screening + Asymptomatic bacteriuria screening + Normal delivery by a skilled attendant + Active management and initial treatment of PPH + Management of OL + Community-based pneumonia (95%) | \$322                         | \$14      | \$26     | \$363      | 15.9                            | \$23                          | Dominated                     |
| 84  | Community newborn care package + Tetanus Toxoid + Pre-eclampsia screening + Asymptomatic bacteriuria screening + SMNC + Management of OL (95%)                                                                                                                | \$322                         | \$22      | \$27     | \$371      | 15.5                            | \$24                          | Dominated                     |
| 85  | Community newborn care package + Tetanus Toxoid + Pre-eclampsia screening + Asymptomatic bacteriuria screening + Normal delivery by a skilled attendant + Active management and initial treatment of PPH + Management of OL + Community-based pneumonia (95%) | \$322                         | \$14      | \$26     | \$363      | 15.9                            | \$23                          | Dominated                     |
| 86  | Community newborn care package + Tetanus Toxoid + Pre-eclampsia screening + Asymptomatic bacteriuria screening + SMNC + Management of OL + Community-based pneumonia (95%)                                                                                    | \$322                         | \$16      | \$28     | \$367      | 17.0                            | \$22                          | Dominated                     |
| 87  | Community newborn care package + Tetanus Toxoid + Pre-eclampsia screening + Asymptomatic bacteriuria screening + SMNC + Treatment of severe PEE + Community-based pneumonia (95%)                                                                             | \$253                         | \$16      | \$28     | \$298      | 16.3                            | \$18                          | Dominated                     |
| 88  | Community newborn care package + Tetanus Toxoid + Pre-eclampsia screening + Asymptomatic bacteriuria screening + SMNC + Treatment of severe PEE + Community-based pneumonia + Management of OL (95%)                                                          | \$415                         | \$18      | \$28     | \$461      | 17.5                            | \$26                          | Dominated                     |
| 89  | Community newborn care package + Tetanus Toxoid + Pre-eclampsia screening + Asymptomatic bacteriuria screening + SMNC + Treatment of severe PEE + Community-based pneumonia + Maternal sepsis (95%)                                                           | \$295                         | \$16      | \$28     | \$340      | 16.6                            | \$20                          | Dominated                     |
| 90  | Community newborn care package + Tetanus Toxoid + Pre-eclampsia screening + Asymptomatic bacteriuria screening + SMNC + Treatment of severe PEE + PPH referral + Community-based pneumonia (95%)                                                              | \$273                         | \$16      | \$28     | \$317      | 16.3                            | \$19                          | Dominated                     |
| 91  | Community newborn care package + Tetanus Toxoid + Pre-eclampsia screening + Asymptomatic bacteriuria screening + SMNC + Treatment of severe PEE + PPH referral + Community-based pneumonia + Maternal sepsis (95%)                                            | \$314                         | \$16      | \$28     | \$359      | 16.7                            | \$22                          | Dominated                     |
| 92  | Community newborn care package + Tetanus Toxoid + Pre-eclampsia screening + Asymptomatic bacteriuria screening + SMNC + Treatment of severe PEE + Management of OL + PPH referral + Community-based pneumonia + Maternal sepsis + ENC (95%)                   | \$576                         | \$21      | \$46     | \$643      | 21.1                            | \$30                          | Dominated                     |
| 93  | Community newborn care package + ANC + SMNC + Treatment of severe PEE + Management of OL + PPH referral + Community-based pneumonia + Maternal sepsis + ENC (95%)                                                                                             | \$577                         | \$22      | \$48     | \$647      | 21.4                            | \$30                          | Dominated                     |
| 94  | Community newborn care package + ANC + SMNC + Treatment of severe PEE + Management of OL + PPH referral + Community-based pneumonia + Maternal sepsis + ENC + Antibiotics pPROM (95%)                                                                         | \$611                         | \$22      | \$48     | \$680      | 21.6                            | \$32                          | Dominated                     |
| 95  | Community newborn care package (80%)                                                                                                                                                                                                                          | \$39                          | \$10      | \$1      | \$50       | 5.9                             | \$8                           | Dominated                     |
| 96  | Support for breastfeeding mothers (80%)                                                                                                                                                                                                                       | \$41                          | \$10      | \$0      | \$52       | 5.0                             | \$10                          | Dominated                     |
| 97  | Pre-eclampsia screening (80%)                                                                                                                                                                                                                                 | \$30                          | \$1       | \$4      | \$36       | 0.6                             | \$65                          | Dominated                     |
| 98  | Tetanus toxoid (80%)                                                                                                                                                                                                                                          | \$35                          | \$1       | \$4      | \$41       | 2.6                             | \$16                          | Dominated                     |
| 99  | Screening & treatment of asymptomatic bacteriuria (80%)                                                                                                                                                                                                       | \$18                          | \$1       | \$4      | \$23       | 0.3                             | \$81                          | Dominated                     |
| 100 | Screening & treatment of syphilis (80%)                                                                                                                                                                                                                       | \$19                          | \$1       | \$4      | \$24       | 0.2                             | \$102                         | Dominated                     |
| 101 | Normal delivery by a skilled attendant (80%)                                                                                                                                                                                                                  | \$81                          | \$1       | \$7      | \$89       | 2.3                             | \$38                          | Dominated                     |
| 102 | Community-based case management for neonatal pneumonia (80%)                                                                                                                                                                                                  | \$1                           | \$0       | \$0      | \$1        | 1.2                             | \$1                           | Dominated                     |
| 103 | Normal delivery by a skilled attendant + Tetanus Toxoid (80%)                                                                                                                                                                                                 | \$116                         | \$1       | \$8      | \$126      | 3.5                             | \$36                          | Dominated                     |
| 104 | Management of maternal sepsis (80%)                                                                                                                                                                                                                           | \$52                          | \$1       | \$0      | \$53       | 0.5                             | \$107                         | Dominated                     |
| 105 | Management of severe neonatal asphyxia (80%)                                                                                                                                                                                                                  | \$10                          | \$1       | \$7      | \$18       | 0.1                             | \$251                         | Dominated                     |
| 106 | Management of serious newborn infections (80%)                                                                                                                                                                                                                | \$84                          | \$1       | \$7      | \$93       | 1.5                             | \$60                          | Dominated                     |
| 107 | Management of very low birth weight babies (80%)                                                                                                                                                                                                              | \$15                          | \$1       | \$7      | \$24       | 0.6                             | \$43                          | Dominated                     |
| 108 | Management of neonatal jaundice (80%)                                                                                                                                                                                                                         | \$9                           | \$1       | \$7      | \$18       | 0.0                             | \$793                         | Dominated                     |
| 109 | Tetanus toxoid + Pre-eclampsia screening (80%)                                                                                                                                                                                                                | \$53                          | \$2       | \$4      | \$59       | 3.1                             | \$19                          | Dominated                     |
| 110 | Tetanus toxoid + Asymptomatic bacteriuria screening screening + Pre-eclampsia                                                                                                                                                                                 | \$53                          | \$3       | \$5      | \$61       | 3.4                             | \$18                          | Dominated                     |

| No. | Description of intervention                                                                                                                                                  | Yearly Costs (millions Int\$) |           |          |            | Yearly DALYs averted (millions) | ACER (Int\$ per DALY averted) | ICER (Int\$ per DALY averted) |
|-----|------------------------------------------------------------------------------------------------------------------------------------------------------------------------------|-------------------------------|-----------|----------|------------|---------------------------------|-------------------------------|-------------------------------|
|     |                                                                                                                                                                              | Patient                       | Programme | Training | Total Cost |                                 |                               |                               |
| 111 | screening (80%)<br>Tetanus toxoid + Asymptomatic bacteriuria screening screening + Pre-eclampsia screening + Syphilis screening (80%)                                        | \$54                          | \$4       | \$6      | \$64       | 3.7                             | \$17                          | Dominated                     |
| 112 | Tetanus toxoid + Normal delivery by a skilled attendant + Active management + Initial PPH treatment (80%)                                                                    | \$123                         | \$3       | \$9      | \$135      | 4.3                             | \$32                          | Dominated                     |
| 113 | Tetanus toxoid + Normal delivery by a skilled attendant + Resuscitation (80%)                                                                                                | \$117                         | \$3       | \$9      | \$128      | 4.4                             | \$29                          | Dominated                     |
| 114 | Tetanus toxoid + Normal delivery by a skilled attendant + Management of OL (80%)                                                                                             | \$218                         | \$3       | \$8      | \$229      | 4.6                             | \$50                          | Dominated                     |
| 115 | Tetanus toxoid + Normal delivery by a skilled attendant + Active management + Initial PPH treatment + Referral PPH treatment (80%)                                           | \$140                         | \$3       | \$9      | \$153      | 4.3                             | \$35                          | Dominated                     |
| 116 | Tetanus toxoid + Normal delivery by a skilled attendant + Antibiotics pPROM (80%)                                                                                            | \$141                         | \$2       | \$9      | \$151      | 3.7                             | \$41                          | Dominated                     |
| 117 | Tetanus toxoid + Normal delivery by a skilled attendant + Steroids for pre-term (80%)                                                                                        | \$190                         | \$3       | \$9      | \$202      | 4.3                             | \$46                          | Dominated                     |
| 118 | Tetanus toxoid + Normal delivery by a skilled attendant + Treatment of severe PEE (80%)                                                                                      | \$144                         | \$1       | \$8      | \$153      | 4.1                             | \$37                          | Dominated                     |
| 119 | Management of vLBW + Management of serious newborn infections (80%)                                                                                                          | \$99                          | \$3       | \$7      | \$109      | 2.1                             | \$52                          | Dominated                     |
| 120 | Management of vLBW + Management of serious newborn infections + Severe asphyxia (80%)                                                                                        | \$109                         | \$3       | \$7      | \$119      | 2.2                             | \$55                          | Dominated                     |
| 121 | Emergency neonatal care (80%)                                                                                                                                                | \$119                         | \$4       | \$7      | \$130      | 2.7                             | \$49                          | Dominated                     |
| 122 | ENC + Management of maternal sepsis (80%)                                                                                                                                    | \$179                         | \$5       | \$7      | \$191      | 2.7                             | \$71                          | Dominated                     |
| 123 | Community newborn care package + Community-based pneumonia (80%)                                                                                                             | \$40                          | \$9       | \$2      | \$50       | 7.2                             | \$7                           | Dominated                     |
| 124 | Tetanus toxoid + Asymptomatic bacteriuria screening screening + Pre-eclampsia screening + Syphilis screening + Normal delivery by a skilled attendant (80%)                  | \$136                         | \$6       | \$9      | \$151      | 4.5                             | \$33                          | Dominated                     |
| 125 | Tetanus toxoid+Asymptomatic bacteriuria screening+Pre-eclampsia screening+Syphilis screening+Normal delivery by a skilled attendant+Treatment of severe PEE                  | \$153                         | \$6       | \$9      | \$168      | 5.0                             | \$34                          | Dominated                     |
| 126 | Tetanus toxoid + bacteriuria + Pre-eclampsia screening+ Syphilis screening + Normal delivery by a skilled attendant + Maternal sepsis referral (80%)                         | \$168                         | \$6       | \$9      | \$184      | 4.8                             | \$38                          | Dominated                     |
| 127 | Tetanus toxoid + bacteriuria + Pre-eclampsia screening+ Syphilis screening + Normal delivery by a skilled attendant + Neonatal sepsis referral (80%)                         | \$219                         | \$6       | \$12     | \$237      | 5.8                             | \$41                          | Dominated                     |
| 128 | Tetanus toxoid + bacteriuria + Pre-eclampsia screening+ Syphilis screening + Normal delivery by a skilled attendant + antibiotics for pPROM + Maternal sepsis referral (80%) | \$193                         | \$6       | \$9      | \$208      | 5.0                             | \$42                          | Dominated                     |
| 129 | Tetanus toxoid + bacteriuria + Pre-eclampsia screening+ Syphilis screening + Normal delivery by a skilled attendant + antibiotics for pPROM + Neonatal sepsis referral (80%) | \$250                         | \$6       | \$12     | \$268      | 5.9                             | \$45                          | Dominated                     |
| 130 | Community newborn care package + Tetanus Toxoid (80%)                                                                                                                        | \$74                          | \$12      | \$5      | \$91       | 8.5                             | \$11                          | Dominated                     |
| 131 | Community-based pneumonia + Tetanus Toxoid (80%)                                                                                                                             | \$36                          | \$1       | \$5      | \$42       | 3.8                             | \$11                          | Dominated                     |
| 132 | Community-based pneumonia + ANC (80%)                                                                                                                                        | \$55                          | \$4       | \$6      | \$65       | 4.9                             | \$13                          | Dominated                     |
| 133 | Community newborn care package + Tetanus Toxoid + Community-based pneumonia (80%)                                                                                            | \$75                          | \$10      | \$6      | \$91       | 9.8                             | \$9                           | Dominated                     |
| 134 | Support for breastfeeding mothers + Tetanus toxoid (80%)                                                                                                                     | \$77                          | \$12      | \$5      | \$93       | 7.6                             | \$12                          | Dominated                     |
| 135 | Community newborn care package + ANC (80%)                                                                                                                                   | \$93                          | \$14      | \$6      | \$114      | 9.6                             | \$12                          | Dominated                     |
| 136 | Community newborn care package + ANC + Community-based pneumonia (80%)                                                                                                       | \$94                          | \$13      | \$7      | \$114      | 10.9                            | \$11                          | Dominated                     |
| 137 | Community newborn care package + ANC + Community-based pneumonia + SMNC (80%)                                                                                                | \$182                         | \$19      | \$13     | \$214      | 13.4                            | \$16                          | Dominated                     |
| 138 | Community newborn care package + ANC + Community-based pneumonia + Management of vLBW (80%)                                                                                  | \$109                         | \$14      | \$15     | \$138      | 11.4                            | \$12                          | Dominated                     |
| 139 | Community newborn care package + ANC + Community-based pneumonia + SMNC + Treatment of severe PEE + Referral PPH + Maternal sepsis + Antibiotics pPROM (80%)                 | \$273                         | \$19      | \$14     | \$306      | 14.4                            | \$21                          | Dominated                     |
| 140 | Community newborn care package + ANC + Community-based pneumonia + SMNC + Management of vLBW (80%)                                                                           | \$197                         | \$20      | \$21     | \$238      | 14.0                            | \$17                          | Dominated                     |

| No. | Description of intervention                                                                                                                                                                                              | Yearly Costs (millions Int\$) |           |          |            | Yearly DALYs averted (millions) | ACER (Int\$ per DALY averted) | ICER (Int\$ per DALY averted) |
|-----|--------------------------------------------------------------------------------------------------------------------------------------------------------------------------------------------------------------------------|-------------------------------|-----------|----------|------------|---------------------------------|-------------------------------|-------------------------------|
|     |                                                                                                                                                                                                                          | Patient                       | Programme | Training | Total Cost |                                 |                               |                               |
| 141 | Community newborn care package + ANC + Community-based pneumonia + SMNC + Treatment of severe PEE (80%)                                                                                                                  | \$199                         | \$19      | \$13     | \$231      | 13.9                            | \$17                          | Dominated                     |
| 142 | Community newborn care package + ANC + Community-based pneumonia + SMNC + Treatment of severe PEE + Steroids pre-term (80%)                                                                                              | \$273                         | \$20      | \$14     | \$307      | 14.7                            | \$21                          | Dominated                     |
| 143 | Community newborn care package + ANC + Community-based pneumonia + SMNC + Treatment of severe PEE + Management of OL (80%)                                                                                               | \$301                         | \$20      | \$13     | \$334      | 14.9                            | \$22                          | Dominated                     |
| 144 | Community newborn care package + ANC + Community-based pneumonia + SMNC + Treatment of severe PEE + ENC (80%)                                                                                                            | \$318                         | \$22      | \$21     | \$361      | 16.5                            | \$22                          | Dominated                     |
| 145 | Community newborn care package + ANC + Community-based pneumonia + SMNC + Treatment of severe PEE (80%)                                                                                                                  | \$199                         | \$19      | \$13     | \$231      | 13.9                            | \$17                          | Dominated                     |
| 146 | Community newborn care package + ANC + Community-based pneumonia + SMNC + Treatment of severe PEE + Referral PPH + Maternal sepsis + Management of OL (80%)                                                              | \$351                         | \$20      | \$13     | \$384      | 15.3                            | \$25                          | Dominated                     |
| 147 | Community newborn care package + ANC + Community-based pneumonia + SMNC + Treatment of severe PEE + Management of vLBW (80%)                                                                                             | \$214                         | \$20      | \$21     | \$254      | 14.4                            | \$18                          | Dominated                     |
| 148 | Community newborn care package + Tetanus Toxoid + Pre-eclampsia screening + Asymptomatic bacteriuria screening + Community-based pneumonia (80%)                                                                         | \$93                          | \$12      | \$7      | \$111      | 10.6                            | \$10                          | Dominated                     |
| 149 | Community newborn care package + ANC + Community-based pneumonia + SMNC + Treatment of severe PEE + ENC (80%)                                                                                                            | \$318                         | \$22      | \$21     | \$361      | 16.5                            | \$22                          | Dominated                     |
| 150 | Community newborn care package + ANC + Community-based pneumonia + SMNC + Treatment of severe PEE + Management of OL (80%)                                                                                               | \$301                         | \$20      | \$13     | \$334      | 14.9                            | \$22                          | Dominated                     |
| 151 | Community newborn care package + Tetanus Toxoid + Pre-eclampsia screening + Asymptomatic bacteriuria screening (80%)                                                                                                     | \$92                          | \$13      | \$6      | \$111      | 9.4                             | \$12                          | Dominated                     |
| 152 | Community newborn care package + ANC + SMNC + Treatment of severe PEE + PPH referral + Community-based pneumonia + Maternal sepsis + ENC (80%)                                                                           | \$367                         | \$20      | \$20     | \$408      | 16.9                            | \$24                          | Dominated                     |
| 153 | Community newborn care package + ANC + Community-based pneumonia + SMNC + Treatment of severe PEE + Management of OL + Steroids pre-term (80%)                                                                           | \$339                         | \$20      | \$14     | \$373      | 15.8                            | \$24                          | Dominated                     |
| 154 | Community newborn care package + ANC + Community-based pneumonia + SMNC + Treatment of severe PEE + Management of OL + Referral PPH (80%)                                                                                | \$283                         | \$19      | \$13     | \$315      | 15.0                            | \$21                          | Dominated                     |
| 155 | Community newborn care package + ANC + Community-based pneumonia + SMNC + Treatment of severe PEE + Management of OL + Management of maternal sepsis (80%)                                                               | \$298                         | \$19      | \$13     | \$330      | 15.2                            | \$22                          | Dominated                     |
| 156 | Community newborn care package + ANC + Community-based pneumonia + SMNC + Treatment of severe PEE + Management of OL + Antibiotics pPROM (80%)                                                                           | \$290                         | \$19      | \$14     | \$323      | 15.1                            | \$21                          | Dominated                     |
| 157 | Community newborn care package + ANC + Community-based pneumonia + SMNC + Treatment of severe PEE + Management of OL + ENC (80%)                                                                                         | \$384                         | \$22      | \$21     | \$427      | 17.6                            | \$24                          | Dominated                     |
| 158 | Community newborn care package + ANC + Community-based pneumonia + SMNC + Treatment of severe PEE + Management of OL + ENC + Steroids pre-term (80%)                                                                     | \$458                         | \$24      | \$21     | \$503      | 18.4                            | \$27                          | Dominated                     |
| 159 | Community newborn care package + Tetanus Toxoid + Normal delivery by a skilled attendant + Active management and initial treatment of PPH (80%)                                                                          | \$162                         | \$13      | \$10     | \$185      | 10.2                            | \$18                          | Dominated                     |
| 160 | Community newborn care package + Tetanus Toxoid + Pre-eclampsia screening + Asymptomatic bacteriuria screening + SMNC + Treatment of severe PEE + PPH referral + Community-based pneumonia + Maternal sepsis + ENC (80%) | \$366                         | \$19      | \$20     | \$405      | 16.7                            | \$24                          | Dominated                     |
| 161 | Community newborn care package + ANC + ENC + SMNC + Treatment of severe PEE + Management of OL + Steroids pre-term + Community-based pneumonia care (80%)                                                                | \$458                         | \$24      | \$21     | \$503      | 18.4                            | \$27                          | Dominated                     |
| 162 | Community newborn care package + ANC + ENC + SMNC + Treatment of severe PEE + Management of OL + Maternal sepsis + Community-based pneumonia care (80%)                                                                  | \$417                         | \$22      | \$21     | \$460      | 17.9                            | \$26                          | Dominated                     |
| 163 | Community newborn care package + ANC + ENC + SMNC + Treatment of severe PEE + Management of OL + PPH referral + Community-based pneumonia care (80%)                                                                     | \$402                         | \$22      | \$21     | \$444      | 17.7                            | \$25                          | Dominated                     |

| No. | Description of intervention                                                                                                                                                                                                                                   | Yearly Costs (millions Int\$) |           |          |            | Yearly DALYs averted (millions) | ACER (Int\$ per DALY averted) | ICER (Int\$ per DALY averted) |
|-----|---------------------------------------------------------------------------------------------------------------------------------------------------------------------------------------------------------------------------------------------------------------|-------------------------------|-----------|----------|------------|---------------------------------|-------------------------------|-------------------------------|
|     |                                                                                                                                                                                                                                                               | Patient                       | Programme | Training | Total Cost |                                 |                               |                               |
| 164 | Community newborn care package + ANC + ENC + SMNC + Treatment of severe PEE + Management of OL + Steroids pre-term + Maternal sepsis + Community-based pneumonia care (80%)                                                                                   | \$490                         | \$24      | \$21     | \$536      | 18.7                            | \$29                          | Dominated                     |
| 165 | Community newborn care package + ANC + ENC + SMNC + Treatment of severe PEE + Management of OL + Steroids pre-term + PPH referral + Community-based pneumonia care (80%)                                                                                      | \$475                         | \$24      | \$21     | \$521      | 18.5                            | \$28                          | Dominated                     |
| 166 | Community newborn care package + ANC + ENC + SMNC + Treatment of severe PEE + Management of OL + Steroids pre-term + Antibiotics pPROM + Community-based pneumonia care (80%)                                                                                 | \$482                         | \$25      | \$22     | \$529      | 18.6                            | \$28                          | Dominated                     |
| 167 | Community newborn care package + ANC + ENC + SMNC + Treatment of severe PEE + Management of OL + Steroids pre-term + Maternal sepsis + Antibiotics pPROM + Community-based pneumonia care (80%)                                                               | \$515                         | \$24      | \$21     | \$560      | 18.9                            | \$30                          | Dominated                     |
| 168 | Community newborn care package + ANC + ENC + SMNC + Treatment of severe PEE + Management of OL + Steroids pre-term + Maternal sepsis + PPH referral + Community-based pneumonia care (80%)                                                                    | \$508                         | \$24      | \$21     | \$553      | 18.8                            | \$29                          | Dominated                     |
| 169 | Community newborn care package + ANC + ENC + SMNC + Treatment of severe PEE + Management of OL + Steroids pre-term + Maternal sepsis + Antibiotics pPROM + PPH referral + Community-based pneumonia care (80%)                                                | \$532                         | \$24      | \$21     | \$578      | 18.9                            | \$30                          | Dominated                     |
| 170 | Community newborn care package + Tetanus Toxoid + SMNC (80%)                                                                                                                                                                                                  | \$162                         | \$15      | \$11     | \$188      | 11.1                            | \$17                          | Dominated                     |
| 171 | Community newborn care package + Tetanus Toxoid + Normal delivery by a skilled attendant + Active management and initial treatment of PPH + Community-based pneumonia (80%)                                                                                   | \$163                         | \$12      | \$11     | \$186      | 11.5                            | \$16                          | Dominated                     |
| 172 | Community newborn care package + Tetanus Toxoid + SMNC + Community-based pneumonia (80%)                                                                                                                                                                      | \$163                         | \$14      | \$12     | \$188      | 12.4                            | \$15                          | Dominated                     |
| 173 | Community newborn care package + Tetanus Toxoid + Pre-eclampsia screening + Asymptomatic bacteriuria screening + Normal delivery by a skilled attendant + Active management and initial treatment of PPH (80%)                                                | \$180                         | \$15      | \$11     | \$205      | 11.1                            | \$19                          | Dominated                     |
| 174 | Community newborn care package + Tetanus Toxoid + Pre-eclampsia screening + Asymptomatic bacteriuria screening + Normal delivery by a skilled attendant + Active management and initial treatment of PPH + Community-based pneumonia (80%)                    | \$180                         | \$14      | \$12     | \$206      | 12.3                            | \$17                          | Dominated                     |
| 175 | Community newborn care package + Tetanus Toxoid + Pre-eclampsia screening + Asymptomatic bacteriuria screening + Normal delivery by a skilled attendant + Active management and initial treatment of PPH + Management of OL (80%)                             | \$246                         | \$15      | \$11     | \$272      | 12.1                            | \$22                          | Dominated                     |
| 176 | Community newborn care package + Tetanus Toxoid + Pre-eclampsia screening + Asymptomatic bacteriuria screening + Normal delivery by a skilled attendant + Active management and initial treatment of PPH + Management of OL + Community-based pneumonia (80%) | \$247                         | \$14      | \$12     | \$272      | 13.4                            | \$20                          | Dominated                     |
| 177 | Community newborn care package + Tetanus Toxoid + Pre-eclampsia screening + Asymptomatic bacteriuria screening + SMNC + Management of OL (80%)                                                                                                                | \$246                         | \$17      | \$12     | \$274      | 13.0                            | \$21                          | Dominated                     |
| 178 | Community newborn care package + Tetanus Toxoid + Pre-eclampsia screening + Asymptomatic bacteriuria screening + Normal delivery by a skilled attendant + Active management and initial treatment of PPH + Management of OL + Community-based pneumonia (80%) | \$247                         | \$14      | \$12     | \$272      | 13.4                            | \$20                          | Dominated                     |
| 179 | Community newborn care package + Tetanus Toxoid + Pre-eclampsia screening + Asymptomatic bacteriuria screening + SMNC + Management of OL + Community-based pneumonia (80%)                                                                                    | \$247                         | \$15      | \$12     | \$275      | 14.3                            | \$19                          | Dominated                     |
| 180 | Community newborn care package + Tetanus Toxoid + Pre-eclampsia screening + Asymptomatic bacteriuria screening + SMNC + Treatment of severe PEE + Community-based pneumonia (80%)                                                                             | \$197                         | \$15      | \$12     | \$225      | 13.7                            | \$16                          | Dominated                     |
| 181 | Community newborn care package + Tetanus Toxoid + Pre-eclampsia screening + Asymptomatic bacteriuria screening + SMNC + Treatment of severe PEE + Community-based pneumonia + Management of OL (80%)                                                          | \$299                         | \$17      | \$12     | \$329      | 14.7                            | \$22                          | Dominated                     |
| 182 | Community newborn care package + Tetanus Toxoid + Pre-eclampsia screening +                                                                                                                                                                                   | \$230                         | \$15      | \$12     | \$258      | 14.0                            | \$18                          | Dominated                     |

| No. | Description of intervention                                                                                                                                                                                                                                                                                                 | Yearly Costs (millions Int\$) |           |          |            | Yearly DALYs averted (millions) | ACER (Int\$ per DALY averted) | ICER (Int\$ per DALY averted) |
|-----|-----------------------------------------------------------------------------------------------------------------------------------------------------------------------------------------------------------------------------------------------------------------------------------------------------------------------------|-------------------------------|-----------|----------|------------|---------------------------------|-------------------------------|-------------------------------|
|     |                                                                                                                                                                                                                                                                                                                             | Patient                       | Programme | Training | Total Cost |                                 |                               |                               |
| 183 | Asymptomatic bacteriuria screening + SMNC + Treatment of severe PEE + Community-based pneumonia + Maternal sepsis (80%)<br>Community newborn care package + Tetanus Toxoid + Pre-eclampsia screening + Asymptomatic bacteriuria screening + SMNC + Treatment of severe PEE + PPH referral + Community-based pneumonia (80%) | \$215                         | \$15      | \$12     | \$242      | 13.8                            | \$18                          | Dominated                     |
| 184 | Community newborn care package + Tetanus Toxoid + Pre-eclampsia screening + Asymptomatic bacteriuria screening + SMNC + Treatment of severe PEE + PPH referral + Community-based pneumonia + Maternal sepsis (80%)                                                                                                          | \$247                         | \$15      | \$12     | \$275      | 14.0                            | \$20                          | Dominated                     |
| 185 | Community newborn care package + Tetanus Toxoid + Pre-eclampsia screening + Asymptomatic bacteriuria screening + SMNC + Treatment of severe PEE + Management of OL + PPH referral + Community-based pneumonia + Maternal sepsis + ENC (80%)                                                                                 | \$432                         | \$19      | \$20     | \$471      | 17.8                            | \$27                          | Dominated                     |
| 186 | Community newborn care package + ANC + SMNC + Treatment of severe PEE + Management of OL + PPH referral + Community-based pneumonia + Maternal sepsis + ENC (80%)                                                                                                                                                           | \$434                         | \$20      | \$20     | \$474      | 18.0                            | \$26                          | Dominated                     |
| 187 | Community newborn care package + ANC + SMNC + Treatment of severe PEE + Management of OL + PPH referral + Community-based pneumonia + Maternal sepsis + ENC + Antibiotics pPROM (80%)                                                                                                                                       | \$458                         | \$20      | \$20     | \$499      | 18.1                            | \$27                          | Dominated                     |
| 189 | Community newborn care package (50%)                                                                                                                                                                                                                                                                                        | \$24                          | \$6       | \$1      | \$31       | 3.7                             | \$8                           | Dominated                     |
| 190 | Support for breastfeeding mothers (50%)                                                                                                                                                                                                                                                                                     | \$26                          | \$6       | \$0      | \$32       | 3.2                             | \$10                          | Dominated                     |
| 191 | Pre-eclampsia screening (50%)                                                                                                                                                                                                                                                                                               | \$15                          | \$1       | \$2      | \$18       | 0.3                             | \$51                          | Dominated                     |
| 192 | Tetanus toxoid (50%)                                                                                                                                                                                                                                                                                                        | \$18                          | \$1       | \$2      | \$20       | 1.6                             | \$12                          | Dominated                     |
| 193 | Screening & treatment of asymptomatic bacteriuria (50%)                                                                                                                                                                                                                                                                     | \$9                           | \$1       | \$2      | \$11       | 0.2                             | \$63                          | Dominated                     |
| 194 | Screening & treatment of syphilis (50%)                                                                                                                                                                                                                                                                                     | \$9                           | \$1       | \$2      | \$12       | 0.1                             | \$80                          | Dominated                     |
| 195 | Normal delivery by a skilled attendant (50%)                                                                                                                                                                                                                                                                                | \$51                          | \$1       | \$3      | \$54       | 1.5                             | \$37                          | Dominated                     |
| 196 | Community-based case management for neonatal pneumonia (50%)                                                                                                                                                                                                                                                                | \$0                           | \$0       | \$0      | \$1        | 0.8                             | \$1                           | Dominated                     |
| 197 | Normal delivery by a skilled attendant + Tetanus Toxoid (50%)                                                                                                                                                                                                                                                               | \$68                          | \$1       | \$3      | \$72       | 2.2                             | \$33                          | Dominated                     |
| 198 | Management of maternal sepsis (50%)                                                                                                                                                                                                                                                                                         | \$30                          | \$1       | \$1      | \$30       | 0.3                             | \$98                          | Dominated                     |
| 199 | Management of severe neonatal asphyxia (50%)                                                                                                                                                                                                                                                                                | \$6                           | \$1       | \$3      | \$9        | 0.0                             | \$205                         | Dominated                     |
| 200 | Management of serious newborn infections (50%)                                                                                                                                                                                                                                                                              | \$48                          | \$1       | \$3      | \$52       | 1.0                             | \$54                          | Dominated                     |
| 201 | Management of very low birth weight babies (50%)                                                                                                                                                                                                                                                                            | \$9                           | \$1       | \$3      | \$12       | 0.3                             | \$36                          | Dominated                     |
| 202 | Management of neonatal jaundice (50%)                                                                                                                                                                                                                                                                                       | \$5                           | \$1       | \$3      | \$9        | 0.0                             | \$642                         | Dominated                     |
| 203 | Tetanus toxoid + Pre-eclampsia screening (50%)                                                                                                                                                                                                                                                                              | \$26                          | \$1       | \$2      | \$29       | 2.0                             | \$15                          | Dominated                     |
| 204 | Tetanus toxoid + Asymptomatic bacteriuria screening screening + Pre-eclampsia screening (50%)                                                                                                                                                                                                                               | \$26                          | \$2       | \$2      | \$30       | 2.1                             | \$14                          | Dominated                     |
| 205 | Tetanus toxoid + Asymptomatic bacteriuria screening screening + Pre-eclampsia screening + Syphilis screening (50%)                                                                                                                                                                                                          | \$27                          | \$2       | \$2      | \$32       | 2.3                             | \$14                          | Dominated                     |
| 206 | Tetanus toxoid + Normal delivery by a skilled attendant + Active management + Initial PPH treatment (50%)                                                                                                                                                                                                                   | \$74                          | \$2       | \$4      | \$80       | 2.7                             | \$30                          | Dominated                     |
| 207 | Tetanus toxoid + Normal delivery by a skilled attendant + Resuscitation (50%)                                                                                                                                                                                                                                               | \$68                          | \$2       | \$4      | \$74       | 2.8                             | \$27                          | Dominated                     |
| 208 | Tetanus toxoid + Normal delivery by a skilled attendant + Management of OL (50%)                                                                                                                                                                                                                                            | \$123                         | \$2       | \$3      | \$128      | 2.8                             | \$45                          | Dominated                     |
| 209 | Tetanus toxoid + Normal delivery by a skilled attendant + Active management + Initial PPH treatment + Referral PPH treatment (50%)                                                                                                                                                                                          | \$88                          | \$2       | \$4      | \$93       | 2.7                             | \$34                          | Dominated                     |
| 210 | Tetanus toxoid + Normal delivery by a skilled attendant + Antibiotics pPROM (50%)                                                                                                                                                                                                                                           | \$82                          | \$3       | \$4      | \$89       | 2.3                             | \$38                          | Dominated                     |
| 211 | Tetanus toxoid + Normal delivery by a skilled attendant + Steroids for pre-term (50%)                                                                                                                                                                                                                                       | \$109                         | \$2       | \$4      | \$114      | 2.7                             | \$42                          | Dominated                     |
| 212 | Tetanus toxoid + Normal delivery by a skilled attendant + Treatment of severe PEE (50%)                                                                                                                                                                                                                                     | \$84                          | \$1       | \$3      | \$88       | 2.6                             | \$34                          | Dominated                     |
| 213 | Management of vLBW + Management of serious newborn infections (50%)                                                                                                                                                                                                                                                         | \$57                          | \$2       | \$3      | \$62       | 1.3                             | \$47                          | Dominated                     |
| 214 | Management of vLBW + Management of serious newborn infections + Severe asphyxia (50%)                                                                                                                                                                                                                                       | \$63                          | \$2       | \$3      | \$67       | 1.4                             | \$50                          | Dominated                     |
| 215 | ENC (50%)                                                                                                                                                                                                                                                                                                                   | \$68                          | \$2       | \$3      | \$73       | 1.7                             | \$44                          | Dominated                     |



| No. | Description of intervention                                                                                                                                                 | Yearly Costs (millions Int\$) |           |          |            | Yearly DALYs averted (millions) | ACER (Int\$ per DALY averted) | ICER (Int\$ per DALY averted) |
|-----|-----------------------------------------------------------------------------------------------------------------------------------------------------------------------------|-------------------------------|-----------|----------|------------|---------------------------------|-------------------------------|-------------------------------|
|     |                                                                                                                                                                             | Patient                       | Programme | Training | Total Cost |                                 |                               |                               |
| 216 | ENC + Management of maternal sepsis (50%)                                                                                                                                   | \$103                         | \$3       | \$3      | \$109      | 1.7                             | \$65                          | Dominated                     |
| 217 | Community newborn care package + Community-based pneumonia (50%)                                                                                                            | \$25                          | \$9       | \$1      | \$35       | 4.5                             | \$8                           | Dominated                     |
| 218 | Tetanus toxoid + Asymptomatic bacteriuria screening screening + Pre-eclampsia screening + Syphilis screening + Normal delivery by a skilled attendant (50%)                 | \$78                          | \$4       | \$4      | \$86       | 2.8                             | \$30                          | Dominated                     |
| 219 | Tetanus toxoid+Asymptomatic bacteriuria screening+Pre-eclampsia screening+Syphilis screening+Normal delivery by a skilled attendant+Treatment of severe PEE                 | \$90                          | \$4       | \$4      | \$97       | 3.1                             | \$31                          | Dominated                     |
| 220 | Tetanus toxoid + bacteruria + Pre-eclampsia screening+ Syphilis screening + Normal delivery by a skilled attendant + Maternal sepsis referral (50%)                         | \$101                         | \$4       | \$4      | \$108      | 3.0                             | \$36                          | Dominated                     |
| 221 | Tetanus toxoid + bacteruria + Pre-eclampsia screening+ Syphilis screening + Normal delivery by a skilled attendant + Neonatal sepsis referral (50%)                         | \$126                         | \$4       | \$5      | \$134      | 3.6                             | \$37                          | Dominated                     |
| 222 | Tetanus toxoid + bacteruria + Pre-eclampsia screening+ Syphilis screening + Normal delivery by a skilled attendant + antibiotics for pPROM + Maternal sepsis referral (50%) | \$117                         | \$4       | \$4      | \$124      | 3.1                             | \$40                          | Dominated                     |
| 223 | Tetanus toxoid + bacteruria + Pre-eclampsia screening+ Syphilis screening + Normal delivery by a skilled attendant + antibiotics for pPROM + Neonatal sepsis referral (50%) | \$144                         | \$4       | \$5      | \$153      | 3.7                             | \$41                          | Dominated                     |
| 224 | Community newborn care package + Tetanus Toxoid (50%)                                                                                                                       | \$42                          | \$7       | \$2      | \$51       | 5.3                             | \$10                          | Dominated                     |
| 225 | Community-based pneumonia + Tetanus Toxoid (50%)                                                                                                                            | \$18                          | \$1       | \$2      | \$21       | 2.4                             | \$9                           | Dominated                     |
| 226 | Community-based pneumonia + ANC (50%)                                                                                                                                       | \$27                          | \$3       | \$3      | \$33       | 3.0                             | \$11                          | Dominated                     |
| 227 | Community newborn care package + Tetanus Toxoid + Community-based pneumonia (50%)                                                                                           | \$42                          | \$10      | \$3      | \$55       | 6.1                             | \$9                           | Dominated                     |
| 228 | Support for breastfeeding mothers + Tetanus toxoid (50%)                                                                                                                    | \$43                          | \$7       | \$2      | \$52       | 4.8                             | \$11                          | Dominated                     |
| 229 | Community newborn care package + ANC (50%)                                                                                                                                  | \$52                          | \$8       | \$3      | \$63       | 6.0                             | \$10                          | Dominated                     |
| 230 | Community newborn care package + ANC + Community-based pneumonia (50%)                                                                                                      | \$52                          | \$11      | \$3      | \$67       | 6.8                             | \$10                          | Dominated                     |
| 231 | Community newborn care package + ANC + Community-based pneumonia + SMNC (50%)                                                                                               | \$109                         | \$15      | \$6      | \$130      | 8.4                             | \$15                          | Dominated                     |
| 232 | Community newborn care package + ANC + Community-based pneumonia + Management of vLBW (50%)                                                                                 | \$61                          | \$12      | \$6      | \$79       | 7.1                             | \$11                          | Dominated                     |
| 233 | Community newborn care package + ANC + Community-based pneumonia + SMNC + Treatment of severe PEE + Referral PPH + Maternal sepsis + Antibiotics pPROM (50%)                | \$170                         | \$18      | \$6      | \$194      | 9.0                             | \$22                          | Dominated                     |
| 234 | Community newborn care package + ANC + Community-based pneumonia + SMNC + Management of vLBW (50%)                                                                          | \$117                         | \$16      | \$9      | \$142      | 8.7                             | \$16                          | Dominated                     |
| 235 | Community newborn care package + ANC + Community-based pneumonia + SMNC + Treatment of severe PEE (50%)                                                                     | \$120                         | \$15      | \$6      | \$141      | 8.7                             | \$16                          | Dominated                     |
| 236 | Community newborn care package + ANC + Community-based pneumonia + SMNC + Treatment of severe PEE + Steroids pre-term (50%)                                                 | \$161                         | \$16      | \$6      | \$183      | 9.2                             | \$20                          | Dominated                     |
| 237 | Community newborn care package + ANC + Community-based pneumonia + SMNC + Treatment of severe PEE + Management of OL (50%)                                                  | \$175                         | \$16      | \$6      | \$197      | 9.3                             | \$21                          | Dominated                     |
| 238 | Community newborn care package + ANC + Community-based pneumonia + SMNC + Treatment of severe PEE + ENC (50%)                                                               | \$188                         | \$17      | \$9      | \$215      | 10.3                            | \$21                          | Dominated                     |
| 239 | Community newborn care package + ANC + Community-based pneumonia + SMNC + Treatment of severe PEE (50%)                                                                     | \$120                         | \$15      | \$6      | \$141      | 8.7                             | \$16                          | Dominated                     |
| 240 | Community newborn care package + ANC + Community-based pneumonia + SMNC + Treatment of severe PEE + Referral PPH + Maternal sepsis + Management of OL (50%)                 | \$212                         | \$16      | \$6      | \$234      | 9.6                             | \$24                          | Dominated                     |
| 241 | Community newborn care package + ANC + Community-based pneumonia + SMNC + Treatment of severe PEE + Management of vLBW (50%)                                                | \$129                         | \$16      | \$9      | \$154      | 9.0                             | \$17                          | Dominated                     |
| 242 | Community newborn care package + Tetanus Toxoid + Pre-eclampsia screening + Asymptomatic bacteriuria screening + Community-based pneumonia (50%)                            | \$51                          | \$11      | \$3      | \$65       | 6.6                             | \$10                          | Dominated                     |
| 243 | Community newborn care package + ANC + Community-based pneumonia + SMNC + Treatment of severe PEE + ENC (50%)                                                               | \$188                         | \$17      | \$9      | \$215      | 10.3                            | \$21                          | Dominated                     |
| 244 | Community newborn care package + ANC + Community-based pneumonia +                                                                                                          | \$175                         | \$16      | \$6      | \$197      | 9.3                             | \$21                          | Dominated                     |

| No. | Description of intervention                                                                                                                                                                                              | Yearly Costs (millions Int\$) |           |          |            | Yearly DALYs averted (millions) | ACER (Int\$ per DALY averted) | ICER (Int\$ per DALY averted) |
|-----|--------------------------------------------------------------------------------------------------------------------------------------------------------------------------------------------------------------------------|-------------------------------|-----------|----------|------------|---------------------------------|-------------------------------|-------------------------------|
|     |                                                                                                                                                                                                                          | Patient                       | Programme | Training | Total Cost |                                 |                               |                               |
| 245 | SMNC + Treatment of severe PEE + Management of OL (50%)<br>Community newborn care package + Tetanus Toxoid + Pre-eclampsia screening + Asymptomatic bacteriuria screening (50%)                                          | \$51                          | \$8       | \$3      | \$61       | 5.9                             | \$10                          | Dominated                     |
| 246 | Community newborn care package + ANC + SMNC + Treatment of severe PEE + PPH referral + Community-based pneumonia + Maternal sepsis + ENC (50%)                                                                           | \$225                         | \$16      | \$9      | \$249      | 10.6                            | \$24                          | Dominated                     |
| 247 | Community newborn care package + ANC + Community-based pneumonia + SMNC + Treatment of severe PEE + Management of OL + Steroids pre-term (50%)                                                                           | \$200                         | \$16      | \$6      | \$222      | 9.9                             | \$23                          | Dominated                     |
| 248 | Community newborn care package + ANC + Community-based pneumonia + SMNC + Treatment of severe PEE + Management of OL + Referral PPH (50%)                                                                                | \$173                         | \$15      | \$6      | \$194      | 9.4                             | \$21                          | Dominated                     |
| 249 | Community newborn care package + ANC + Community-based pneumonia + SMNC + Treatment of severe PEE + Management of OL + Management of maternal sepsis (50%)                                                               | \$182                         | \$15      | \$6      | \$203      | 9.5                             | \$21                          | Dominated                     |
| 250 | Community newborn care package + ANC + Community-based pneumonia + SMNC + Treatment of severe PEE + Management of OL + Antibiotics pPROM (50%)                                                                           | \$173                         | \$18      | \$6      | \$196      | 9.4                             | \$21                          | Dominated                     |
| 251 | Community newborn care package + ANC + Community-based pneumonia + SMNC + Treatment of severe PEE + Management of OL + ENC (50%)                                                                                         | \$227                         | \$17      | \$9      | \$253      | 11.0                            | \$23                          | Dominated                     |
| 252 | Community newborn care package + ANC + Community-based pneumonia + SMNC + Treatment of severe PEE + Management of OL + ENC + Steroids pre-term (50%)                                                                     | \$268                         | \$18      | \$9      | \$296      | 11.5                            | \$26                          | Dominated                     |
| 253 | Community newborn care package + Tetanus Toxoid + Normal delivery by a skilled attendant + Active management and initial treatment of PPH (50%)                                                                          | \$98                          | \$8       | \$4      | \$110      | 6.4                             | \$17                          | Dominated                     |
| 254 | Community newborn care package + Tetanus Toxoid + Pre-eclampsia screening + Asymptomatic bacteriuria screening + SMNC + Treatment of severe PEE + PPH referral + Community-based pneumonia + Maternal sepsis + ENC (50%) | \$224                         | \$15      | \$8      | \$248      | 10.4                            | \$24                          | Dominated                     |
| 255 | Community newborn care package + ANC + ENC + SMNC + Treatment of severe PEE + Management of OL + Steroids pre-term + Community-based pneumonia care (50%)                                                                | \$268                         | \$18      | \$9      | \$296      | 11.5                            | \$26                          | Dominated                     |
| 256 | Community newborn care package + ANC + ENC + SMNC + Treatment of severe PEE + Management of OL + Maternal sepsis + Community-based pneumonia care (50%)                                                                  | \$250                         | \$17      | \$9      | \$276      | 11.2                            | \$25                          | Dominated                     |
| 257 | Community newborn care package + ANC + ENC + SMNC + Treatment of severe PEE + Management of OL + PPH referral + Community-based pneumonia care (50%)                                                                     | \$241                         | \$17      | \$9      | \$267      | 11.0                            | \$24                          | Dominated                     |
| 258 | Community newborn care package + ANC + ENC + SMNC + Treatment of severe PEE + Management of OL + Steroids pre-term + Maternal sepsis + Community-based pneumonia care (50%)                                              | \$290                         | \$18      | \$9      | \$318      | 11.7                            | \$27                          | Dominated                     |
| 259 | Community newborn care package + ANC + ENC + SMNC + Treatment of severe PEE + Management of OL + Steroids pre-term + PPH referral + Community-based pneumonia care (50%)                                                 | \$282                         | \$18      | \$9      | \$309      | 11.6                            | \$27                          | Dominated                     |
| 260 | Community newborn care package + ANC + ENC + SMNC + Treatment of severe PEE + Management of OL + Steroids pre-term + Antibiotics pPROM + Community-based pneumonia care (50%)                                            | \$281                         | \$21      | \$9      | \$312      | 11.6                            | \$27                          | Dominated                     |
| 261 | Community newborn care package + ANC + ENC + SMNC + Treatment of severe PEE + Management of OL + Steroids pre-term + Maternal sepsis + Antibiotics pPROM + Community-based pneumonia care (50%)                          | \$307                         | \$18      | \$9      | \$334      | 11.8                            | \$28                          | Dominated                     |
| 262 | Community newborn care package + ANC + ENC + SMNC + Treatment of severe PEE + Management of OL + Steroids pre-term + Maternal sepsis + PPH referral + Community-based pneumonia care (50%)                               | \$304                         | \$18      | \$9      | \$332      | 11.7                            | \$28                          | Dominated                     |
| 263 | Community newborn care package + ANC + ENC + SMNC + Treatment of severe PEE + Management of OL + Steroids pre-term + Maternal sepsis + Antibiotics pPROM + PPH referral + Community-based pneumonia care (50%)           | \$320                         | \$18      | \$9      | \$348      | 11.8                            | \$29                          | Dominated                     |
| 264 | Community newborn care package + Tetanus Toxoid + SMNC (50%)                                                                                                                                                             | \$98                          | \$9       | \$5      | \$112      | 7.0                             | \$16                          | Dominated                     |
| 265 | Community newborn care package + Tetanus Toxoid + Normal delivery by a                                                                                                                                                   | \$99                          | \$11      | \$5      | \$115      | 7.2                             | \$16                          | Dominated                     |

| No. | Description of intervention                                                                                                                                                                                                                                   | Yearly Costs (millions Int\$) |           |          |            | Yearly DALYs averted (millions) | ACER (Int\$ per DALY averted) | ICER (Int\$ per DALY averted) |
|-----|---------------------------------------------------------------------------------------------------------------------------------------------------------------------------------------------------------------------------------------------------------------|-------------------------------|-----------|----------|------------|---------------------------------|-------------------------------|-------------------------------|
|     |                                                                                                                                                                                                                                                               | Patient                       | Programme | Training | Total Cost |                                 |                               |                               |
| 266 | skilled attendant + Active management and initial treatment of PPH + Community-based pneumonia (50%)<br>Community newborn care package + Tetanus Toxoid + SMNC + Community-based pneumonia (50%)                                                              | \$99                          | \$12      | \$5      | \$116      | 7.8                             | \$15                          | Dominated                     |
| 267 | Community newborn care package + Tetanus Toxoid + Pre-eclampsia screening + Asymptomatic bacteriuria screening + Normal delivery by a skilled attendant + Active management and initial treatment of PPH (50%)                                                | \$107                         | \$9       | \$5      | \$120      | 6.9                             | \$17                          | Dominated                     |
| 268 | Community newborn care package + Tetanus Toxoid + Pre-eclampsia screening + Asymptomatic bacteriuria screening + Normal delivery by a skilled attendant + Active management and initial treatment of PPH + Community-based pneumonia (50%)                    | \$107                         | \$12      | \$5      | \$125      | 7.7                             | \$16                          | Dominated                     |
| 269 | Community newborn care package + Tetanus Toxoid + Pre-eclampsia screening + Asymptomatic bacteriuria screening + Normal delivery by a skilled attendant + Active management and initial treatment of PPH + Management of OL (50%)                             | \$146                         | \$9       | \$5      | \$159      | 7.6                             | \$21                          | Dominated                     |
| 270 | Community newborn care package + Tetanus Toxoid + Pre-eclampsia screening + Asymptomatic bacteriuria screening + Normal delivery by a skilled attendant + Active management and initial treatment of PPH + Management of OL + Community-based pneumonia (50%) | \$146                         | \$12      | \$5      | \$163      | 8.4                             | \$20                          | Dominated                     |
| 271 | Community newborn care package + Tetanus Toxoid + Pre-eclampsia screening + Asymptomatic bacteriuria screening + SMNC + Management of OL (50%)                                                                                                                | \$146                         | \$10      | \$5      | \$161      | 8.2                             | \$20                          | Dominated                     |
| 272 | Community newborn care package + Tetanus Toxoid + Pre-eclampsia screening + Asymptomatic bacteriuria screening + Normal delivery by a skilled attendant + Active management and initial treatment of PPH + Management of OL + Community-based pneumonia (50%) | \$146                         | \$12      | \$5      | \$163      | 8.4                             | \$20                          | Dominated                     |
| 273 | Community newborn care package + Tetanus Toxoid + Pre-eclampsia screening + Asymptomatic bacteriuria screening + SMNC + Management of OL + Community-based pneumonia (50%)                                                                                    | \$146                         | \$13      | \$6      | \$165      | 8.9                             | \$18                          | Dominated                     |
| 274 | Community newborn care package + Tetanus Toxoid + Pre-eclampsia screening + Asymptomatic bacteriuria screening + SMNC + Treatment of severe PEE + Community-based pneumonia (50%)                                                                             | \$119                         | \$13      | \$6      | \$138      | 8.6                             | \$16                          | Dominated                     |
| 275 | Community newborn care package + Tetanus Toxoid + Pre-eclampsia screening + Asymptomatic bacteriuria screening + SMNC + Treatment of severe PEE + Community-based pneumonia + Management of OL (50%)                                                          | \$174                         | \$14      | \$6      | \$194      | 9.2                             | \$21                          | Dominated                     |
| 276 | Community newborn care package + Tetanus Toxoid + Pre-eclampsia screening + Asymptomatic bacteriuria screening + SMNC + Treatment of severe PEE + Community-based pneumonia + Maternal sepsis (50%)                                                           | \$142                         | \$13      | \$6      | \$160      | 8.7                             | \$18                          | Dominated                     |
| 277 | Community newborn care package + Tetanus Toxoid + Pre-eclampsia screening + Asymptomatic bacteriuria screening + SMNC + Treatment of severe PEE + PPH referral + Community-based pneumonia (50%)                                                              | \$133                         | \$13      | \$6      | \$152      | 8.6                             | \$18                          | Dominated                     |
| 278 | Community newborn care package + Tetanus Toxoid + Pre-eclampsia screening + Asymptomatic bacteriuria screening + SMNC + Treatment of severe PEE + PPH referral + Community-based pneumonia + Maternal sepsis (50%)                                            | \$156                         | \$13      | \$6      | \$174      | 8.8                             | \$20                          | Dominated                     |
| 279 | Community newborn care package + Tetanus Toxoid + Pre-eclampsia screening + Asymptomatic bacteriuria screening + SMNC + Treatment of severe PEE + Management of OL + PPH referral + Community-based pneumonia + Maternal sepsis + ENC (50%)                   | \$263                         | \$15      | \$8      | \$286      | 11.1                            | \$26                          | Dominated                     |
| 280 | Community newborn care package + ANC + SMNC + Treatment of severe PEE + Management of OL + PPH referral + Community-based pneumonia + Maternal sepsis + ENC (50%)                                                                                             | \$264                         | \$16      | \$9      | \$288      | 11.2                            | \$26                          | Dominated                     |
| 281 | Community newborn care package + ANC + SMNC + Treatment of severe PEE + Management of OL + PPH referral + Community-based pneumonia + Maternal sepsis + ENC + Antibiotics pPROM (50%)                                                                         | \$280                         | \$16      | \$9      | \$304      | 11.3                            | \$27                          | Dominated                     |
