# Supplementary material
Source: PubMed Central journal article supplement (PMC1283271)
Supplement: bmj_331_7525_1107__3.pdf [file bmj_331_7525_1107__3.pdf]

**Table G: [As supplied by authors] Annual costs, effects and cost-effectiveness of interventions for Sear-D in 2000.**

| No. | Description of intervention                                                                               | Yearly Costs (millions Int\$) |           |          |            | Yearly DALYs averted (millions) | ACER (Int\$ per DALY averted) | ICER (Int\$ per DALY averted) |
|-----|-----------------------------------------------------------------------------------------------------------|-------------------------------|-----------|----------|------------|---------------------------------|-------------------------------|-------------------------------|
|     |                                                                                                           | Patient                       | Programme | Training | Total Cost |                                 |                               |                               |
| 1   | Community newborn care package (95%)                                                                      | \$76                          | \$18      | \$5      | \$99       | 16.2                            | \$6                           | Dominated                     |
| 2   | Support for breastfeeding mothers (95%)                                                                   | \$78                          | \$18      | \$2      | \$98       | 16.1                            | \$6                           | \$7                           |
| 3   | Pre-eclampsia screening (95%)                                                                             | \$74                          | \$3       | \$7      | \$84       | 0.3                             | \$300                         | Dominated                     |
| 4   | Tetanus toxoid (95%)                                                                                      | \$86                          | \$3       | \$7      | \$96       | 11.9                            | \$8                           | Dominated                     |
| 5   | Screening & treatment of asymptomatic bacteriuria (95%)                                                   | \$43                          | \$3       | \$7      | \$53       | 0.1                             | \$444                         | Dominated                     |
| 6   | Screening & treatment of syphilis (95%)                                                                   | \$46                          | \$3       | \$7      | \$56       | 0.0                             | \$4,003                       | Dominated                     |
| 7   | Normal delivery by a skilled attendant (95%)                                                              | \$188                         | \$3       | \$18     | \$209      | 7.6                             | \$28                          | Dominated                     |
| 8   | Community-based case management for neonatal pneumonia (95%)                                              | \$1                           | \$1       | \$3      | \$5        | 0.1                             | \$77                          | Dominated                     |
| 9   | Normal delivery by a skilled attendant + Tetanus Toxoid (95%)                                             | \$275                         | \$3       | \$22     | \$300      | 13.2                            | \$23                          | Dominated                     |
| 10  | Management of maternal sepsis (95%)                                                                       | \$149                         | \$3       |          | \$152      | 0.5                             | \$299                         | Dominated                     |
| 11  | Management of severe neonatal asphyxia (95%)                                                              | \$29                          | \$3       | \$18     | \$50       | 0.0                             | \$13,700                      | Dominated                     |
| 12  | Management of serious newborn infections (95%)                                                            | \$150                         | \$3       | \$18     | \$171      | 0.1                             | \$2,223                       | Dominated                     |
| 13  | Management of very low birth weight babies (95%)                                                          | \$61                          | \$3       | \$18     | \$82       | 0.0                             | \$2,128                       | Dominated                     |
| 14  | Management of neonatal jaundice (95%)                                                                     | \$27                          | \$3       | \$18     | \$48       | 0.0                             | \$39,936                      | Dominated                     |
| 15  | Tetanus toxoid + Pre-eclampsia screening (95%)                                                            | \$129                         | \$5       | \$7      | \$140      | 12.2                            | \$11                          | Dominated                     |
| 16  | Tetanus toxoid + Asymptomatic bacteriuria screening + Pre-eclampsia screening (95%)                       | \$129                         | \$8       | \$9      | \$145      | 12.3                            | \$12                          | Dominated                     |
| 17  | Tetanus toxoid + Asymptomatic bacteriuria screening + Pre-eclampsia screening + Syphilis screening (95%)  | \$133                         | \$10      | \$11     | \$155      | 12.3                            | \$13                          | Dominated                     |
| 18  | Tetanus toxoid + Normal delivery by a skilled attendant + Active management + Initial PPH treatment (95%) | \$288                         | \$8       | \$31     | \$327      | 14.5                            | \$23                          | Dominated                     |
| 19  | Tetanus toxoid + Normal delivery by a skilled attendant + Resuscitation (95%)                             | \$275                         | \$8       | \$26     | \$310      | 13.2                            | \$23                          | Dominated                     |
| 20  | Tetanus toxoid + Normal delivery by a skilled                                                             | \$571                         | \$8       | \$22     | \$601      | 13.2                            | \$45                          | Dominated                     |

| No. | Description of intervention                                                                                                                                                 | Yearly Costs (millions Int\$) |           |          | Total Cost | Yearly DALYs averted (millions) | ACER (Int\$ per DALY averted) | ICER (Int\$ per DALY averted) |
|-----|-----------------------------------------------------------------------------------------------------------------------------------------------------------------------------|-------------------------------|-----------|----------|------------|---------------------------------|-------------------------------|-------------------------------|
|     |                                                                                                                                                                             | Patient                       | Programme | Training |            |                                 |                               |                               |
| 21  | attendant + Management of OL (95%)<br>Tetanus toxoid + Normal delivery by a skilled attendant + Active management + Initial PPH treatment + Referral PPH treatment (95%)    | \$322                         | \$8       | \$31     | \$361      | 14.7                            | \$25                          | Dominated                     |
| 22  | Tetanus toxoid + Normal delivery by a skilled attendant + Antibiotics pPROM (95%)                                                                                           | \$374                         | \$7       | \$26     | \$407      | 13.2                            | \$31                          | Dominated                     |
| 23  | Tetanus toxoid + Normal delivery by a skilled attendant + Steroids for pre-term (95%)                                                                                       | \$574                         | \$8       | \$26     | \$608      | 13.2                            | \$46                          | Dominated                     |
| 24  | Tetanus toxoid + Normal delivery by a skilled attendant + Treatment of severe PEE (95%)                                                                                     | \$355                         | \$3       | \$22     | \$380      | 13.5                            | \$28                          | Dominated                     |
| 25  | Management of vLBW + Management of serious newborn infections (95%)                                                                                                         | \$301                         | \$8       | \$18     | \$326      | 0.1                             | \$2,822                       | Dominated                     |
| 26  | Management of vLBW + Management of serious newborn infections + Severe asphyxia (95%)                                                                                       | \$329                         | \$8       | \$18     | \$355      | 0.1                             | \$2,975                       | Dominated                     |
| 27  | ENC (95%)                                                                                                                                                                   | \$357                         | \$10      | \$18     | \$385      | 0.6                             | \$614                         | Dominated                     |
| 28  | ENC + Management of maternal sepsis (95%)                                                                                                                                   | \$529                         | \$13      | \$18     | \$560      | 0.6                             | \$891                         | Dominated                     |
| 29  | SMNC (95%)                                                                                                                                                                  | \$201                         | \$13      | \$32     | \$245      | 9.0                             | \$27                          | Dominated                     |
| 30  | Community newborn care package + Community-based pneumonia (95%)                                                                                                            | \$77                          | \$16      | \$15     | \$108      | 16.3                            | \$7                           | Dominated                     |
| 31  | Tetanus toxoid + Asymptomatic bacteriuria screening screening + Pre-eclampsia screening + Syphilis screening + Normal delivery by a skilled attendant (95%)                 | \$322                         | \$17      | \$31     | \$371      | 13.5                            | \$27                          | Dominated                     |
| 32  | Tetanus toxoid+Asymptomatic bacteriuria screening+Pre-eclampsia screening+Syphilis screening+Normal delivery by a skilled attendant+Treatment of severe PEE                 | \$365                         | \$17      | \$31     | \$413      | 13.7                            | \$30                          | Dominated                     |
| 33  | Tetanus toxoid + Asymptomatic bacteriuria screening + Pre-eclampsia screening+ Syphilis screening + Normal delivery by a skilled attendant + Maternal sepsis referral (95%) | \$406                         | \$17      | \$31     | \$454      | 13.8                            | \$33                          | Dominated                     |
| 34  | Tetanus toxoid + Asymptomatic bacteriuria                                                                                                                                   | \$470                         | \$17      | \$49     | \$536      | 13.6                            | \$39                          | Dominated                     |

| No. | Description of intervention                                                                                                                                                                                                                                                                                                              | Yearly Costs (millions Int\$) |           |          | Total Cost | Yearly DALYs averted (millions) | ACER (Int\$ per DALY averted) | ICER (Int\$ per DALY averted) |
|-----|------------------------------------------------------------------------------------------------------------------------------------------------------------------------------------------------------------------------------------------------------------------------------------------------------------------------------------------|-------------------------------|-----------|----------|------------|---------------------------------|-------------------------------|-------------------------------|
|     |                                                                                                                                                                                                                                                                                                                                          | Patient                       | Programme | Training |            |                                 |                               |                               |
| 35  | screening + Pre-eclampsia screening+ Syphilis screening + Normal delivery by a skilled attendant + Neonatal sepsis referral (95%)<br>Tetanus toxoid + Asymptomatic bacteriuria screening + Pre-eclampsia screening+ Syphilis screening + Normal delivery by a skilled attendant + antibiotics for pPROM + Maternal sepsis referral (95%) | \$471                         | \$17      | \$31     | \$519      | 13.9                            | \$37                          | Dominated                     |
| 36  | Tetanus toxoid + Asymptomatic bacteriuria screening + Pre-eclampsia screening+ Syphilis screening + Normal delivery by a skilled attendant + antibiotics for pPROM + Neonatal sepsis referral (95%)                                                                                                                                      | \$556                         | \$17      | \$49     | \$622      | 13.6                            | \$46                          | Dominated                     |
| 37  | Community newborn care package + Tetanus Toxoid (95%)                                                                                                                                                                                                                                                                                    | \$163                         | \$22      | \$11     | \$195      | 28.1                            | \$7                           | \$20                          |
| 38  | Community-based pneumonia + Tetanus Toxoid (95%)                                                                                                                                                                                                                                                                                         | \$87                          | \$4       | \$10     | \$101      | 12.0                            | \$8                           | Dominated                     |
| 39  | Community-based pneumonia + ANC (95%)                                                                                                                                                                                                                                                                                                    | \$134                         | \$11      | \$14     | \$160      | 12.4                            | \$13                          | Dominated                     |
| 40  | Community newborn care package + Tetanus Toxoid + Community-based pneumonia (95%)                                                                                                                                                                                                                                                        | \$164                         | \$19      | \$22     | \$204      | 28.2                            | \$7                           | Dominated                     |
| 41  | Support for breastfeeding mothers + Tetanus toxoid (95%)                                                                                                                                                                                                                                                                                 | \$164                         | \$22      | \$9      | \$194      | 28.1                            | \$7                           | \$9                           |
| 42  | Community newborn care package + ANC (95%)                                                                                                                                                                                                                                                                                               | \$209                         | \$29      | \$16     | \$254      | 28.5                            | \$9                           | Dominated                     |
| 43  | Community newborn care package + ANC + Community-based pneumonia (95%)                                                                                                                                                                                                                                                                   | \$210                         | \$26      | \$26     | \$263      | 28.6                            | \$9                           | Dominated                     |
| 44  | Community newborn care package + ANC + Community-based pneumonia + SMNC (95%)                                                                                                                                                                                                                                                            | \$412                         | \$42      | \$60     | \$515      | 31.2                            | \$16                          | Dominated                     |
| 45  | Community newborn care package + ANC + Community-based pneumonia + Management of vLBW (95%)                                                                                                                                                                                                                                              | \$271                         | \$29      | \$44     | \$345      | 28.6                            | \$12                          | Dominated                     |
| 46  | Community newborn care package + ANC + Community-based pneumonia + SMNC +                                                                                                                                                                                                                                                                | \$671                         | \$45      | \$65     | \$781      | 31.9                            | \$25                          | Dominated                     |

| No. | Description of intervention                                                                                                                                                              | Yearly Costs (millions Int\$) |           |          | Total Cost | Yearly DALYs averted (millions) | ACER (Int\$ per DALY averted) | ICER (Int\$ per DALY averted) |
|-----|------------------------------------------------------------------------------------------------------------------------------------------------------------------------------------------|-------------------------------|-----------|----------|------------|---------------------------------|-------------------------------|-------------------------------|
|     |                                                                                                                                                                                          | Patient                       | Programme | Training |            |                                 |                               |                               |
| 47  | Treatment of severe PEE + Referral PPH + Maternal sepsis + Antibiotics pPROM (95%)<br>Community newborn care package + ANC + Community-based pneumonia + SMNC + Management of vLBW (95%) | \$473                         | \$45      | \$78     | \$597      | 31.3                            | \$19                          | Dominated                     |
| 48  | Community newborn care package + ANC + Community-based pneumonia + SMNC + Treatment of severe PEE (95%)                                                                                  | \$455                         | \$42      | \$60     | \$558      | 31.4                            | \$18                          | Dominated                     |
| 49  | Community newborn care package + ANC + Community-based pneumonia + SMNC + Treatment of severe PEE + Steroids pre-term (95%)                                                              | \$754                         | \$47      | \$65     | \$865      | 31.5                            | \$27                          | Dominated                     |
| 50  | Community newborn care package + ANC + Community-based pneumonia + SMNC + Treatment of severe PEE + Management of OL (95%)                                                               | \$751                         | \$47      | \$60     | \$858      | 31.5                            | \$27                          | Dominated                     |
| 51  | Community newborn care package + ANC + Community-based pneumonia + SMNC + Treatment of severe PEE + ENC (95%)                                                                            | \$812                         | \$53      | \$78     | \$943      | 32.0                            | \$29                          | Dominated                     |
| 52  | Community newborn care package + ANC + Community-based pneumonia + SMNC + Treatment of severe PEE (95%)                                                                                  | \$455                         | \$42      | \$60     | \$558      | 31.4                            | \$18                          | Dominated                     |
| 53  | Community newborn care package + ANC + Community-based pneumonia + SMNC + Treatment of severe PEE + Referral PPH + Maternal sepsis + Management of OL (95%)                              | \$869                         | \$47      | \$60     | \$976      | 31.9                            | \$31                          | Dominated                     |
| 54  | Community newborn care package + ANC + Community-based pneumonia + SMNC + Treatment of severe PEE + Management of vLBW (95%)                                                             | \$516                         | \$45      | \$78     | \$640      | 31.5                            | \$20                          | Dominated                     |
| 55  | Community newborn care package + Tetanus Toxoid + Pre-eclampsia screening +                                                                                                              | \$206                         | \$24      | \$24     | \$254      | 28.6                            | \$9                           | Dominated                     |

| No. | Description of intervention                                                                                                                                                           | Yearly Costs (millions Int\$) |           |          | Total Cost | Yearly DALYs averted (millions) | ACER (Int\$ per DALY averted) | ICER (Int\$ per DALY averted) |
|-----|---------------------------------------------------------------------------------------------------------------------------------------------------------------------------------------|-------------------------------|-----------|----------|------------|---------------------------------|-------------------------------|-------------------------------|
|     |                                                                                                                                                                                       | Patient                       | Programme | Training |            |                                 |                               |                               |
| 56  | Asymptomatic bacteriuria screening + Community-based pneumonia (95%)<br>Community newborn care package + ANC + Community-based pneumonia + SMNC + Treatment of severe PEE + ENC (95%) | \$812                         | \$53      | \$78     | \$943      | 32.0                            | \$29                          | Dominated                     |
| 57  | Community newborn care package + ANC + Community-based pneumonia + SMNC + Treatment of severe PEE + Management of OL (95%)                                                            | \$751                         | \$47      | \$60     | \$858      | 31.5                            | \$27                          | Dominated                     |
| 58  | Community newborn care package + Tetanus Toxoid + Pre-eclampsia screening + Asymptomatic bacteriuria screening (95%)                                                                  | \$205                         | \$26      | \$13     | \$245      | 28.5                            | \$9                           | Dominated                     |
| 59  | Community newborn care package + ANC + SMNC + Treatment of severe PEE + PPH referral + Community-based pneumonia + Maternal sepsis + ENC (95%)                                        | \$929                         | \$46      | \$73     | \$1,049    | 32.5                            | \$32                          | \$699                         |
| 60  | Community newborn care package + ANC + Community-based pneumonia + SMNC + Treatment of severe PEE + Management of OL + Steroids pre-term (95%)                                        | \$940                         | \$47      | \$65     | \$1,051    | 31.5                            | \$33                          | Dominated                     |
| 61  | Community newborn care package + ANC + Community-based pneumonia + SMNC + Treatment of severe PEE + Management of OL + Referral PPH (95%)                                             | \$675                         | \$42      | \$60     | \$777      | 31.6                            | \$25                          | Dominated                     |
| 62  | Community newborn care package + ANC + Community-based pneumonia + SMNC + Treatment of severe PEE + Management of OL + Management of maternal sepsis (95%)                            | \$724                         | \$42      | \$60     | \$827      | 31.8                            | \$26                          | Dominated                     |
| 63  | Community newborn care package + ANC + Community-based pneumonia + SMNC + Treatment of severe PEE + Management of OL + Antibiotics pPROM (95%)                                        | \$739                         | \$45      | \$65     | \$850      | 31.5                            | \$27                          | Dominated                     |

| No. | Description of intervention                                                                                                                                                                                              | Yearly Costs (millions Int\$) |           |          | Total Cost | Yearly DALYs averted (millions) | ACER (Int\$ per DALY averted) | ICER (Int\$ per DALY averted) |
|-----|--------------------------------------------------------------------------------------------------------------------------------------------------------------------------------------------------------------------------|-------------------------------|-----------|----------|------------|---------------------------------|-------------------------------|-------------------------------|
|     |                                                                                                                                                                                                                          | Patient                       | Programme | Training |            |                                 |                               |                               |
| 64  | Community newborn care package + ANC + Community-based pneumonia + SMNC + Treatment of severe PEE + Management of OL + ENC (95%)                                                                                         | \$998                         | \$53      | \$78     | \$1,129    | 32.1                            | \$35                          | Dominated                     |
| 65  | Community newborn care package + ANC + Community-based pneumonia + SMNC + Treatment of severe PEE + Management of OL + ENC + Steroids pre-term (95%)                                                                     | \$1,297                       | \$57      | \$83     | \$1,436    | 32.2                            | \$45                          | Dominated                     |
| 66  | Community newborn care package + Tetanus Toxoid + Normal delivery by a skilled attendant + Active management and initial treatment of PPH (95%)                                                                          | \$364                         | \$26      | \$36     | \$426      | 30.7                            | \$14                          | \$88                          |
| 67  | Community newborn care package + Tetanus Toxoid + Pre-eclampsia screening + Asymptomatic bacteriuria screening + SMNC + Treatment of severe PEE + PPH referral + Community-based pneumonia + Maternal sepsis + ENC (95%) | \$925                         | \$43      | \$71     | \$1,039    | 32.5                            | \$32                          | \$614                         |
| 68  | Community newborn care package + ANC + ENC + SMNC + Treatment of severe PEE + Management of OL + Steroids pre-term + Community-based pneumonia care (95%)                                                                | \$1,297                       | \$57      | \$83     | \$1,436    | 32.2                            | \$45                          | Dominated                     |
| 69  | Community newborn care package + ANC + ENC + SMNC + Treatment of severe PEE + Management of OL + Maternal sepsis + Community-based pneumonia care (95%)                                                                  | \$1,081                       | \$53      | \$78     | \$1,212    | 32.4                            | \$37                          | Dominated                     |
| 70  | Community newborn care package + ANC + ENC + SMNC + Treatment of severe PEE + Management of OL + PPH referral + Community-based pneumonia care (95%)                                                                     | \$1,032                       | \$53      | \$78     | \$1,162    | 32.2                            | \$36                          | Dominated                     |
| 71  | Community newborn care package + ANC + ENC + SMNC + Treatment of severe PEE +                                                                                                                                            | \$1,380                       | \$57      | \$83     | \$1,520    | 32.5                            | \$47                          | Dominated                     |

| No. | Description of intervention                                                                                                                                                                                    | Yearly Costs (millions Int\$) |           |          | Total Cost | Yearly DALYs averted (millions) | ACER (Int\$ per DALY averted) | ICER (Int\$ per DALY averted) |
|-----|----------------------------------------------------------------------------------------------------------------------------------------------------------------------------------------------------------------|-------------------------------|-----------|----------|------------|---------------------------------|-------------------------------|-------------------------------|
|     |                                                                                                                                                                                                                | Patient                       | Programme | Training |            |                                 |                               |                               |
|     | Management of OL + Steroids pre-term + Maternal sepsis + Community-based pneumonia care (95%)                                                                                                                  |                               |           |          |            |                                 |                               |                               |
| 72  | Community newborn care package + ANC + ENC + SMNC + Treatment of severe PEE + Management of OL + Steroids pre-term + PPH referral + Community-based pneumonia care (95%)                                       | \$1,331                       | \$57      | \$83     | \$1,470    | 32.3                            | \$46                          | Dominated                     |
| 73  | Community newborn care package + ANC + ENC + SMNC + Treatment of severe PEE + Management of OL + Steroids pre-term + Antibiotics pPROM + Community-based pneumonia care (95%)                                  | \$1,395                       | \$60      | \$87     | \$1,543    | 32.2                            | \$48                          | Dominated                     |
| 74  | Community newborn care package + ANC + ENC + SMNC + Treatment of severe PEE + Management of OL + Steroids pre-term + Maternal sepsis + Antibiotics pPROM + Community-based pneumonia care (95%)                | \$1,445                       | \$57      | \$83     | \$1,585    | 32.5                            | \$49                          | Dominated                     |
| 75  | Community newborn care package + ANC + ENC + SMNC + Treatment of severe PEE + Management of OL + Steroids pre-term + Maternal sepsis + PPH referral + Community-based pneumonia care (95%)                     | \$1,414                       | \$57      | \$83     | \$1,554    | 32.6                            | \$48                          | Dominated                     |
| 76  | Community newborn care package + ANC + ENC + SMNC + Treatment of severe PEE + Management of OL + Steroids pre-term + Maternal sepsis + Antibiotics pPROM + PPH referral + Community-based pneumonia care (95%) | \$1,479                       | \$57      | \$83     | \$1,619    | 32.6                            | \$50                          | \$16,930                      |
| 77  | Community newborn care package + Tetanus Toxoid + SMNC (95%)                                                                                                                                                   | \$364                         | \$31      | \$40     | \$435      | 30.8                            | \$14                          | Dominated                     |
| 78  | Community newborn care package + Tetanus                                                                                                                                                                       | \$365                         | \$24      | \$46     | \$435      | 30.8                            | \$14                          | Dominated                     |

| No. | Description of intervention                                                                                                                                                                                                                                   | Yearly Costs (millions Int\$) |           |          | Total Cost | Yearly DALYs averted (millions) | ACER (Int\$ per DALY averted) | ICER (Int\$ per DALY averted) |
|-----|---------------------------------------------------------------------------------------------------------------------------------------------------------------------------------------------------------------------------------------------------------------|-------------------------------|-----------|----------|------------|---------------------------------|-------------------------------|-------------------------------|
|     |                                                                                                                                                                                                                                                               | Patient                       | Programme | Training |            |                                 |                               |                               |
| 79  | Toxoid + Normal delivery by a skilled attendant + Active management and initial treatment of PPH + Community-based pneumonia (95%)<br>Community newborn care package + Tetanus Toxoid + SMNC + Community-based pneumonia (95%)                                | \$365                         | \$28      | \$51     | \$445      | 30.9                            | \$14                          | Dominated                     |
| 80  | Community newborn care package + Tetanus Toxoid + Pre-eclampsia screening + Asymptomatic bacteriuria screening + Normal delivery by a skilled attendant + Active management and initial treatment of PPH (95%)                                                | \$407                         | \$31      | \$38     | \$476      | 31.1                            | \$15                          | \$123                         |
| 81  | Community newborn care package + Tetanus Toxoid + Pre-eclampsia screening + Asymptomatic bacteriuria screening + Normal delivery by a skilled attendant + Active management and initial treatment of PPH + Community-based pneumonia (95%)                    | \$408                         | \$28      | \$48     | \$485      | 31.2                            | \$16                          | \$144                         |
| 82  | Community newborn care package + Tetanus Toxoid + Pre-eclampsia screening + Asymptomatic bacteriuria screening + Normal delivery by a skilled attendant + Active management and initial treatment of PPH + Management of OL (95%)                             | \$593                         | \$31      | \$38     | \$661      | 31.2                            | \$21                          | Dominated                     |
| 83  | Community newborn care package + Tetanus Toxoid + Pre-eclampsia screening + Asymptomatic bacteriuria screening + Normal delivery by a skilled attendant + Active management and initial treatment of PPH + Management of OL + Community-based pneumonia (95%) | \$594                         | \$28      | \$48     | \$670      | 31.3                            | \$21                          | Dominated                     |
| 84  | Community newborn care package + Tetanus Toxoid + Pre-eclampsia screening +                                                                                                                                                                                   | \$593                         | \$35      | \$42     | \$671      | 31.3                            | \$21                          | Dominated                     |



| No. | Description of intervention                                                                                                                                                                                                                                                                                                         | Yearly Costs (millions Int\$) |           |          | Total Cost | Yearly DALYs averted (millions) | ACER (Int\$ per DALY averted) | ICER (Int\$ per DALY averted) |
|-----|-------------------------------------------------------------------------------------------------------------------------------------------------------------------------------------------------------------------------------------------------------------------------------------------------------------------------------------|-------------------------------|-----------|----------|------------|---------------------------------|-------------------------------|-------------------------------|
|     |                                                                                                                                                                                                                                                                                                                                     | Patient                       | Programme | Training |            |                                 |                               |                               |
| 85  | Asymptomatic bacteriuria screening + SMNC + Management of OL (95%)<br>Community newborn care package + Tetanus Toxoid + Pre-eclampsia screening + Asymptomatic bacteriuria screening + Normal delivery by a skilled attendant + Active management and initial treatment of PPH + Management of OL + Community-based pneumonia (95%) | \$594                         | \$28      | \$48     | \$670      | 31.3                            | \$21                          | Dominated                     |
| 86  | Community newborn care package + Tetanus Toxoid + Pre-eclampsia screening + Asymptomatic bacteriuria screening + SMNC + Management of OL + Community-based pneumonia (95%)                                                                                                                                                          | \$594                         | \$33      | \$53     | \$680      | 31.3                            | \$22                          | Dominated                     |
| 87  | Community newborn care package + Tetanus Toxoid + Pre-eclampsia screening + Asymptomatic bacteriuria screening + SMNC + Treatment of severe PEE + Community-based pneumonia (95%)                                                                                                                                                   | \$451                         | \$33      | \$53     | \$537      | 31.4                            | \$17                          | \$218                         |
| 88  | Community newborn care package + Tetanus Toxoid + Pre-eclampsia screening + Asymptomatic bacteriuria screening + SMNC + Treatment of severe PEE + Community-based pneumonia + Management of OL (95%)                                                                                                                                | \$747                         | \$37      | \$53     | \$838      | 31.5                            | \$27                          | Dominated                     |
| 89  | Community newborn care package + Tetanus Toxoid + Pre-eclampsia screening + Asymptomatic bacteriuria screening + SMNC + Treatment of severe PEE + Community-based pneumonia + Maternal sepsis (95%)                                                                                                                                 | \$534                         | \$33      | \$53     | \$620      | 31.7                            | \$20                          | Dominated                     |
| 90  | Community newborn care package + Tetanus Toxoid + Pre-eclampsia screening + Asymptomatic bacteriuria screening + SMNC +                                                                                                                                                                                                             | \$485                         | \$33      | \$53     | \$571      | 31.6                            | \$18                          | \$261                         |

| No. | Description of intervention                                                                                                                                                                                                                                                                    | Yearly Costs (millions Int\$) |           |          | Total Cost | Yearly DALYs averted (millions) | ACER (Int\$ per DALY averted) | ICER (Int\$ per DALY averted) |
|-----|------------------------------------------------------------------------------------------------------------------------------------------------------------------------------------------------------------------------------------------------------------------------------------------------|-------------------------------|-----------|----------|------------|---------------------------------|-------------------------------|-------------------------------|
|     |                                                                                                                                                                                                                                                                                                | Patient                       | Programme | Training |            |                                 |                               |                               |
| 91  | Treatment of severe PEE + PPH referral + Community-based pneumonia (95%)<br>Community newborn care package + Tetanus Toxoid + Pre-eclampsia screening + Asymptomatic bacteriuria screening + SMNC + Treatment of severe PEE + PPH referral + Community-based pneumonia + Maternal sepsis (95%) | \$568                         | \$33      | \$53     | \$654      | 31.9                            | \$21                          | \$290                         |
| 92  | Community newborn care package + Tetanus Toxoid + Pre-eclampsia screening + Asymptomatic bacteriuria screening + SMNC + Treatment of severe PEE + Management of OL + PPH referral + Community-based pneumonia + Maternal sepsis + ENC (95%)                                                    | \$1,111                       | \$43      | \$71     | \$1,225    | 32.6                            | \$38                          | Dominated                     |
| 93  | Community newborn care package + ANC + SMNC + Treatment of severe PEE + Management of OL + PPH referral + Community-based pneumonia + Maternal sepsis + ENC (95%)                                                                                                                              | \$1,115                       | \$46      | \$73     | \$1,234    | 32.6                            | \$38                          | \$2,638                       |
| 94  | Community newborn care package + ANC + SMNC + Treatment of severe PEE + Management of OL + PPH referral + Community-based pneumonia + Maternal sepsis + ENC + Antibiotics pPROM (95%)                                                                                                          | \$1,180                       | \$46      | \$73     | \$1,299    | 32.6                            | \$40                          | \$2,808                       |
| 95  | Community newborn care package (80%)                                                                                                                                                                                                                                                           | \$64                          | \$13      | \$4      | \$81       | 13.7                            | \$6                           | Dominated                     |
| 96  | Support for breastfeeding mothers (80%)                                                                                                                                                                                                                                                        | \$66                          | \$13      | \$2      | \$80       | 13.6                            | \$6                           | \$6                           |
| 97  | Pre-eclampsia screening (80%)                                                                                                                                                                                                                                                                  | \$59                          | \$3       | \$5      | \$66       | 0.2                             | \$279                         | Dominated                     |
| 98  | Tetanus toxoid (80%)                                                                                                                                                                                                                                                                           | \$68                          | \$3       | \$5      | \$75       | 10.0                            | \$8                           | Dominated                     |
| 99  | Screening & treatment of asymptomatic bacteriuria (80%)                                                                                                                                                                                                                                        | \$34                          | \$3       | \$5      | \$41       | 0.1                             | \$410                         | Dominated                     |
| 100 | Screening & treatment of syphilis (80%)                                                                                                                                                                                                                                                        | \$36                          | \$3       | \$5      | \$43       | 0.0                             | \$3,711                       | Dominated                     |
| 101 | Normal delivery by a skilled attendant (80%)                                                                                                                                                                                                                                                   | \$158                         | \$3       | \$12     | \$173      | 6.4                             | \$27                          | Dominated                     |
| 102 | Community-based case management for neonatal                                                                                                                                                                                                                                                   | \$1                           | \$0       | \$3      | \$4        | 0.1                             | \$85                          | Dominated                     |

| No. | Description of intervention                                                                                                        | Yearly Costs (millions Int\$) |           |          | Total Cost | Yearly DALYs averted (millions) | ACER (Int\$ per DALY averted) | ICER (Int\$ per DALY averted) |
|-----|------------------------------------------------------------------------------------------------------------------------------------|-------------------------------|-----------|----------|------------|---------------------------------|-------------------------------|-------------------------------|
|     |                                                                                                                                    | Patient                       | Programme | Training |            |                                 |                               |                               |
| 103 | pneumonia (80%)<br>Normal delivery by a skilled attendant + Tetanus Toxoid (80%)                                                   | \$227                         | \$3       | \$15     | \$245      | 11.1                            | \$22                          | Dominated                     |
| 104 | Management of maternal sepsis (80%)                                                                                                | \$107                         | \$3       |          | \$110      | 0.4                             | \$256                         | Dominated                     |
| 105 | Management of severe neonatal asphyxia (80%)                                                                                       | \$21                          | \$3       | \$12     | \$36       | 0.0                             | \$11,599                      | Dominated                     |
| 106 | Management of serious newborn infections (80%)                                                                                     | \$108                         | \$3       | \$12     | \$123      | 0.1                             | \$1,898                       | Dominated                     |
| 107 | Management of very low birth weight babies (80%)                                                                                   | \$44                          | \$3       | \$12     | \$59       | 0.0                             | \$1,805                       | Dominated                     |
| 108 | Management of neonatal jaundice (80%)                                                                                              | \$19                          | \$3       | \$12     | \$34       | 0.0                             | \$33,591                      | Dominated                     |
| 109 | Tetanus toxoid + Pre-eclampsia screening (80%)                                                                                     | \$102                         | \$4       | \$5      | \$110      | 10.3                            | \$11                          | Dominated                     |
| 110 | Tetanus toxoid + Asymptomatic bacteriuria screening screening + Pre-eclampsia screening (80%)                                      | \$102                         | \$7       | \$6      | \$114      | 10.4                            | \$11                          | Dominated                     |
| 111 | Tetanus toxoid + Asymptomatic bacteriuria screening screening + Pre-eclampsia screening + Syphilis screening (80%)                 | \$105                         | \$9       | \$8      | \$122      | 10.4                            | \$12                          | Dominated                     |
| 112 | Tetanus toxoid + Normal delivery by a skilled attendant + Active management + Initial PPH treatment (80%)                          | \$240                         | \$7       | \$21     | \$268      | 12.2                            | \$22                          | Dominated                     |
| 113 | Tetanus toxoid + Normal delivery by a skilled attendant + Resuscitation (80%)                                                      | \$227                         | \$7       | \$18     | \$252      | 11.1                            | \$23                          | Dominated                     |
| 114 | Tetanus toxoid + Normal delivery by a skilled attendant + Management of OL (80%)                                                   | \$421                         | \$7       | \$15     | \$442      | 11.1                            | \$40                          | Dominated                     |
| 115 | Tetanus toxoid + Normal delivery by a skilled attendant + Active management + Initial PPH treatment + Referral PPH treatment (80%) | \$271                         | \$7       | \$21     | \$299      | 12.3                            | \$24                          | Dominated                     |
| 116 | Tetanus toxoid + Normal delivery by a skilled attendant + Antibiotics pPROM (80%)                                                  | \$293                         | \$4       | \$18     | \$315      | 11.1                            | \$28                          | Dominated                     |
| 117 | Tetanus toxoid + Normal delivery by a skilled attendant + Steroids for pre-term (80%)                                              | \$427                         | \$7       | \$18     | \$452      | 11.1                            | \$41                          | Dominated                     |
| 118 | Tetanus toxoid + Normal delivery by a skilled attendant + Treatment of severe PEE (80%)                                            | \$281                         | \$3       | \$15     | \$299      | 11.4                            | \$26                          | Dominated                     |

| No. | Description of intervention                                                                                                                                                 | Yearly Costs (millions Int\$) |           |          |            | Yearly DALYs averted (millions) | ACER (Int\$ per DALY averted) | ICER (Int\$ per DALY averted) |
|-----|-----------------------------------------------------------------------------------------------------------------------------------------------------------------------------|-------------------------------|-----------|----------|------------|---------------------------------|-------------------------------|-------------------------------|
|     |                                                                                                                                                                             | Patient                       | Programme | Training | Total Cost |                                 |                               |                               |
| 119 | Management of vLBW + Management of serious newborn infections (80%)                                                                                                         | \$216                         | \$7       | \$12     | \$235      | 0.1                             | \$2,414                       | Dominated                     |
| 120 | Management of vLBW + Management of serious newborn infections + Severe asphyxia (80%)                                                                                       | \$237                         | \$7       | \$12     | \$256      | 0.1                             | \$2,544                       | Dominated                     |
| 121 | ENC (80%)                                                                                                                                                                   | \$256                         | \$9       | \$12     | \$277      | 0.5                             | \$525                         | Dominated                     |
| 122 | ENC + Management of maternal sepsis (80%)                                                                                                                                   | \$383                         | \$11      | \$12     | \$406      | 0.5                             | \$768                         | Dominated                     |
| 123 | Community newborn care package + Community-based pneumonia (80%)                                                                                                            | \$65                          | \$16      | \$13     | \$94       | 13.7                            | \$7                           | Dominated                     |
| 124 | Tetanus toxoid + Asymptomatic bacteriuria screening screening + Pre-eclampsia screening + Syphilis screening + Normal delivery by a skilled attendant (80%)                 | \$264                         | \$14      | \$21     | \$300      | 11.4                            | \$26                          | Dominated                     |
| 125 | Tetanus toxoid+Asymptomatic bacteriuria screening+Pre-eclampsia screening+Syphilis screening+Normal delivery by a skilled attendant+Treatment of severe PEE                 | \$298                         | \$14      | \$21     | \$333      | 11.6                            | \$29                          | Dominated                     |
| 126 | Tetanus toxoid + bacteruria + Pre-eclampsia screening+ Syphilis screening + Normal delivery by a skilled attendant + Maternal sepsis referral (80%)                         | \$331                         | \$14      | \$21     | \$367      | 11.6                            | \$31                          | Dominated                     |
| 127 | Tetanus toxoid + bacteruria + Pre-eclampsia screening+ Syphilis screening + Normal delivery by a skilled attendant + Neonatal sepsis referral (80%)                         | \$370                         | \$14      | \$33     | \$418      | 11.5                            | \$36                          | Dominated                     |
| 128 | Tetanus toxoid + bacteruria + Pre-eclampsia screening+ Syphilis screening + Normal delivery by a skilled attendant + antibiotics for pPROM + Maternal sepsis referral (80%) | \$380                         | \$14      | \$21     | \$415      | 11.7                            | \$36                          | Dominated                     |
| 129 | Tetanus toxoid + bacteruria + Pre-eclampsia screening+ Syphilis screening + Normal delivery by a skilled attendant + antibiotics for pPROM + Neonatal sepsis referral (80%) | \$430                         | \$14      | \$33     | \$478      | 11.5                            | \$42                          | Dominated                     |

| No. | Description of intervention                                                                                                                                  | Yearly Costs (millions Int\$) |           |          |            | Yearly DALYs averted (millions) | ACER (Int\$ per DALY averted) | ICER (Int\$ per DALY averted) |
|-----|--------------------------------------------------------------------------------------------------------------------------------------------------------------|-------------------------------|-----------|----------|------------|---------------------------------|-------------------------------|-------------------------------|
|     |                                                                                                                                                              | Patient                       | Programme | Training | Total Cost |                                 |                               |                               |
| 130 | Community newborn care package + Tetanus Toxoid (80%)                                                                                                        | \$132                         | \$15      | \$8      | \$156      | 23.7                            | \$7                           | Dominated                     |
| 131 | Community-based pneumonia + Tetanus Toxoid (80%)                                                                                                             | \$69                          | \$3       | \$8      | \$80       | 10.1                            | \$8                           | Dominated                     |
| 132 | Community-based pneumonia + ANC (80%)                                                                                                                        | \$106                         | \$9       | \$11     | \$126      | 10.4                            | \$12                          | Dominated                     |
| 133 | Community newborn care package + Tetanus Toxoid + Community-based pneumonia (80%)                                                                            | \$133                         | \$18      | \$17     | \$169      | 23.7                            | \$7                           | Dominated                     |
| 134 | Support for breastfeeding mothers + Tetanus toxoid (80%)                                                                                                     | \$134                         | \$15      | \$6      | \$155      | 23.6                            | \$7                           | \$8                           |
| 135 | Community newborn care package + ANC (80%)                                                                                                                   | \$170                         | \$22      | \$12     | \$203      | 24.0                            | \$8                           | Dominated                     |
| 136 | Community newborn care package + ANC + Community-based pneumonia (80%)                                                                                       | \$170                         | \$25      | \$21     | \$216      | 24.1                            | \$9                           | Dominated                     |
| 137 | Community newborn care package + ANC + Community-based pneumonia + SMNC (80%)                                                                                | \$343                         | \$38      | \$43     | \$424      | 26.3                            | \$16                          | Dominated                     |
| 138 | Community newborn care package + ANC + Community-based pneumonia + Management of vLBW (80%)                                                                  | \$214                         | \$27      | \$33     | \$274      | 24.1                            | \$11                          | Dominated                     |
| 139 | Community newborn care package + ANC + Community-based pneumonia + SMNC + Treatment of severe PEE + Referral PPH + Maternal sepsis + Antibiotics pPROM (80%) | \$539                         | \$39      | \$47     | \$624      | 26.8                            | \$23                          | Dominated                     |
| 140 | Community newborn care package + ANC + Community-based pneumonia + SMNC + Management of vLBW (80%)                                                           | \$386                         | \$41      | \$56     | \$483      | 26.3                            | \$18                          | Dominated                     |
| 141 | Community newborn care package + ANC + Community-based pneumonia + SMNC + Treatment of severe PEE (80%)                                                      | \$376                         | \$38      | \$43     | \$457      | 26.5                            | \$17                          | Dominated                     |
| 142 | Community newborn care package + ANC + Community-based pneumonia + SMNC + Treatment of severe PEE + Steroids pre-term (80%)                                  | \$576                         | \$42      | \$47     | \$664      | 26.5                            | \$25                          | Dominated                     |
| 143 | Community newborn care package + ANC +                                                                                                                       | \$569                         | \$42      | \$43     | \$655      | 26.5                            | \$25                          | Dominated                     |

| No. | Description of intervention                                                                                                                                 | Yearly Costs (millions Int\$) |           |          | Total Cost | Yearly DALYs averted (millions) | ACER (Int\$ per DALY averted) | ICER (Int\$ per DALY averted) |
|-----|-------------------------------------------------------------------------------------------------------------------------------------------------------------|-------------------------------|-----------|----------|------------|---------------------------------|-------------------------------|-------------------------------|
|     |                                                                                                                                                             | Patient                       | Programme | Training |            |                                 |                               |                               |
|     | Community-based pneumonia + SMNC + Treatment of severe PEE + Management of OL (80%)                                                                         |                               |           |          |            |                                 |                               |                               |
| 144 | Community newborn care package + ANC + Community-based pneumonia + SMNC + Treatment of severe PEE + ENC (80%)                                               | \$632                         | \$47      | \$56     | \$735      | 27.0                            | \$27                          | Dominated                     |
| 145 | Community newborn care package + ANC + Community-based pneumonia + SMNC + Treatment of severe PEE (80%)                                                     | \$376                         | \$38      | \$43     | \$457      | 26.5                            | \$17                          | Dominated                     |
| 146 | Community newborn care package + ANC + Community-based pneumonia + SMNC + Treatment of severe PEE + Referral PPH + Maternal sepsis + Management of OL (80%) | \$666                         | \$42      | \$43     | \$752      | 26.9                            | \$28                          | Dominated                     |
| 147 | Community newborn care package + ANC + Community-based pneumonia + SMNC + Treatment of severe PEE + Management of vLBW (80%)                                | \$420                         | \$41      | \$56     | \$516      | 26.5                            | \$19                          | Dominated                     |
| 148 | Community newborn care package + Tetanus Toxoid + Pre-eclampsia screening + Asymptomatic bacteriuria screening + Community-based pneumonia (80%)            | \$167                         | \$22      | \$19     | \$208      | 24.1                            | \$9                           | Dominated                     |
| 149 | Community newborn care package + ANC + Community-based pneumonia + SMNC + Treatment of severe PEE + ENC (80%)                                               | \$632                         | \$47      | \$56     | \$735      | 27.0                            | \$27                          | Dominated                     |
| 150 | Community newborn care package + ANC + Community-based pneumonia + SMNC + Treatment of severe PEE + Management of OL (80%)                                  | \$569                         | \$42      | \$43     | \$655      | 26.5                            | \$25                          | Dominated                     |
| 151 | Community newborn care package + Tetanus Toxoid + Pre-eclampsia screening + Asymptomatic bacteriuria screening (80%)                                        | \$166                         | \$19      | \$10     | \$195      | 24.0                            | \$8                           | Dominated                     |
| 152 | Community newborn care package + ANC +                                                                                                                      | \$729                         | \$41      | \$53     | \$823      | 27.4                            | \$30                          | Dominated                     |

| No. | Description of intervention                                                                                                                                                                                                                               | Yearly Costs (millions Int\$) |           |          | Total Cost | Yearly DALYs averted (millions) | ACER (Int\$ per DALY averted) | ICER (Int\$ per DALY averted) |
|-----|-----------------------------------------------------------------------------------------------------------------------------------------------------------------------------------------------------------------------------------------------------------|-------------------------------|-----------|----------|------------|---------------------------------|-------------------------------|-------------------------------|
|     |                                                                                                                                                                                                                                                           | Patient                       | Programme | Training |            |                                 |                               |                               |
| 153 | SMNC + Treatment of severe PEE + PPH referral + Community-based pneumonia + Maternal sepsis + ENC (80%)<br>Community newborn care package + ANC + Community-based pneumonia + SMNC + Treatment of severe PEE + Management of OL + Steroids pre-term (80%) | \$714                         | \$42      | \$47     | \$802      | 26.6                            | \$30                          | Dominated                     |
| 154 | Community newborn care package + ANC + Community-based pneumonia + SMNC + Treatment of severe PEE + Management of OL + Referral PPH (80%)                                                                                                                 | \$544                         | \$38      | \$43     | \$626      | 26.6                            | \$23                          | Dominated                     |
| 155 | Community newborn care package + ANC + Community-based pneumonia + SMNC + Treatment of severe PEE + Management of OL + Management of maternal sepsis (80%)                                                                                                | \$580                         | \$38      | \$43     | \$662      | 26.8                            | \$25                          | Dominated                     |
| 156 | Community newborn care package + ANC + Community-based pneumonia + SMNC + Treatment of severe PEE + Management of OL + Antibiotics pPROM (80%)                                                                                                            | \$580                         | \$39      | \$47     | \$666      | 26.5                            | \$25                          | Dominated                     |
| 157 | Community newborn care package + ANC + Community-based pneumonia + SMNC + Treatment of severe PEE + Management of OL + ENC (80%)                                                                                                                          | \$770                         | \$47      | \$56     | \$873      | 27.0                            | \$32                          | Dominated                     |
| 158 | Community newborn care package + ANC + Community-based pneumonia + SMNC + Treatment of severe PEE + Management of OL + ENC + Steroids pre-term (80%)                                                                                                      | \$970                         | \$51      | \$59     | \$1,079    | 27.1                            | \$40                          | Dominated                     |
| 159 | Community newborn care package + Tetanus Toxoid + Normal delivery by a skilled attendant + Active management and initial treatment of PPH (80%)                                                                                                           | \$305                         | \$19      | \$25     | \$349      | 25.9                            | \$13                          | Dominated                     |
| 160 | Community newborn care package + Tetanus                                                                                                                                                                                                                  | \$725                         | \$39      | \$51     | \$815      | 27.4                            | \$30                          | Dominated                     |

| No. | Description of intervention                                                                                                                                                                                                                                                                                                                  | Yearly Costs (millions Int\$) |           |          | Total Cost | Yearly DALYs averted (millions) | ACER (Int\$ per DALY averted) | ICER (Int\$ per DALY averted) |
|-----|----------------------------------------------------------------------------------------------------------------------------------------------------------------------------------------------------------------------------------------------------------------------------------------------------------------------------------------------|-------------------------------|-----------|----------|------------|---------------------------------|-------------------------------|-------------------------------|
|     |                                                                                                                                                                                                                                                                                                                                              | Patient                       | Programme | Training |            |                                 |                               |                               |
| 161 | Toxoid + Pre-eclampsia screening + Asymptomatic bacteriuria screening + SMNC + Treatment of severe PEE + PPH referral + Community-based pneumonia + Maternal sepsis + ENC (80%)<br>Community newborn care package + ANC + ENC + SMNC + Treatment of severe PEE + Management of OL + Steroids pre-term + Community-based pneumonia care (80%) | \$970                         | \$51      | \$59     | \$1,079    | 27.1                            | \$40                          | Dominated                     |
| 162 | Community newborn care package + ANC + ENC + SMNC + Treatment of severe PEE + Management of OL + Maternal sepsis + Community-based pneumonia care (80%)                                                                                                                                                                                      | \$837                         | \$47      | \$56     | \$939      | 27.3                            | \$34                          | Dominated                     |
| 163 | Community newborn care package + ANC + ENC + SMNC + Treatment of severe PEE + Management of OL + PPH referral + Community-based pneumonia care (80%)                                                                                                                                                                                         | \$801                         | \$47      | \$56     | \$903      | 27.2                            | \$33                          | Dominated                     |
| 164 | Community newborn care package + ANC + ENC + SMNC + Treatment of severe PEE + Management of OL + Steroids pre-term + Maternal sepsis + Community-based pneumonia care (80%)                                                                                                                                                                  | \$1,036                       | \$51      | \$59     | \$1,146    | 27.3                            | \$42                          | Dominated                     |
| 165 | Community newborn care package + ANC + ENC + SMNC + Treatment of severe PEE + Management of OL + Steroids pre-term + PPH referral + Community-based pneumonia care (80%)                                                                                                                                                                     | \$1,000                       | \$51      | \$59     | \$1,110    | 27.2                            | \$41                          | Dominated                     |
| 166 | Community newborn care package + ANC + ENC + SMNC + Treatment of severe PEE + Management of OL + Steroids pre-term + Antibiotics pPROM + Community-based pneumonia care (80%)                                                                                                                                                                | \$1,036                       | \$52      | \$62     | \$1,150    | 27.1                            | \$42                          | Dominated                     |



| No. | Description of intervention                                                                                                                                                                                    | Yearly Costs (millions Int\$) |           |          | Total Cost | Yearly DALYs averted (millions) | ACER (Int\$ per DALY averted) | ICER (Int\$ per DALY averted) |
|-----|----------------------------------------------------------------------------------------------------------------------------------------------------------------------------------------------------------------|-------------------------------|-----------|----------|------------|---------------------------------|-------------------------------|-------------------------------|
|     |                                                                                                                                                                                                                | Patient                       | Programme | Training |            |                                 |                               |                               |
| 167 | Community newborn care package + ANC + ENC + SMNC + Treatment of severe PEE + Management of OL + Steroids pre-term + Maternal sepsis + Antibiotics pPROM + Community-based pneumonia care (80%)                | \$1,085                       | \$51      | \$59     | \$1,195    | 27.4                            | \$44                          | Dominated                     |
| 168 | Community newborn care package + ANC + ENC + SMNC + Treatment of severe PEE + Management of OL + Steroids pre-term + Maternal sepsis + PPH referral + Community-based pneumonia care (80%)                     | \$1,067                       | \$51      | \$59     | \$1,176    | 27.4                            | \$43                          | Dominated                     |
| 169 | Community newborn care package + ANC + ENC + SMNC + Treatment of severe PEE + Management of OL + Steroids pre-term + Maternal sepsis + Antibiotics pPROM + PPH referral + Community-based pneumonia care (80%) | \$1,116                       | \$51      | \$59     | \$1,225    | 27.5                            | \$45                          | Dominated                     |
| 170 | Community newborn care package + Tetanus Toxoid + SMNC (80%)                                                                                                                                                   | \$305                         | \$23      | \$28     | \$356      | 25.9                            | \$14                          | Dominated                     |
| 171 | Community newborn care package + Tetanus Toxoid + Normal delivery by a skilled attendant + Active management and initial treatment of PPH + Community-based pneumonia (80%)                                    | \$305                         | \$22      | \$34     | \$362      | 25.9                            | \$14                          | Dominated                     |
| 172 | Community newborn care package + Tetanus Toxoid + SMNC + Community-based pneumonia (80%)                                                                                                                       | \$305                         | \$26      | \$37     | \$369      | 26.0                            | \$14                          | Dominated                     |
| 173 | Community newborn care package + Tetanus Toxoid + Pre-eclampsia screening + Asymptomatic bacteriuria screening + Normal delivery by a skilled attendant + Active management and initial treatment of PPH (80%) | \$338                         | \$23      | \$27     | \$388      | 26.2                            | \$15                          | Dominated                     |
| 174 | Community newborn care package + Tetanus Toxoid + Pre-eclampsia screening +                                                                                                                                    | \$339                         | \$26      | \$36     | \$401      | 26.3                            | \$15                          | Dominated                     |

| No. | Description of intervention                                                                                                                                                                                                                                                                                                                                                                         | Yearly Costs (millions Int\$) |           |          | Total Cost | Yearly DALYs averted (millions) | ACER (Int\$ per DALY averted) | ICER (Int\$ per DALY averted) |
|-----|-----------------------------------------------------------------------------------------------------------------------------------------------------------------------------------------------------------------------------------------------------------------------------------------------------------------------------------------------------------------------------------------------------|-------------------------------|-----------|----------|------------|---------------------------------|-------------------------------|-------------------------------|
|     |                                                                                                                                                                                                                                                                                                                                                                                                     | Patient                       | Programme | Training |            |                                 |                               |                               |
| 175 | Asymptomatic bacteriuria screening + Normal delivery by a skilled attendant + Active management and initial treatment of PPH + Community-based pneumonia (80%)<br>Community newborn care package + Tetanus Toxoid + Pre-eclampsia screening + Asymptomatic bacteriuria screening + Normal delivery by a skilled attendant + Active management and initial treatment of PPH + Management of OL (80%) | \$476                         | \$23      | \$27     | \$526      | 26.3                            | \$20                          | Dominated                     |
| 176 | Community newborn care package + Tetanus Toxoid + Pre-eclampsia screening + Asymptomatic bacteriuria screening + Normal delivery by a skilled attendant + Active management and initial treatment of PPH + Management of OL + Community-based pneumonia (80%)                                                                                                                                       | \$477                         | \$26      | \$36     | \$539      | 26.3                            | \$20                          | Dominated                     |
| 177 | Community newborn care package + Tetanus Toxoid + Pre-eclampsia screening + Asymptomatic bacteriuria screening + SMNC + Management of OL (80%)                                                                                                                                                                                                                                                      | \$476                         | \$27      | \$30     | \$533      | 26.3                            | \$20                          | Dominated                     |
| 178 | Community newborn care package + Tetanus Toxoid + Pre-eclampsia screening + Asymptomatic bacteriuria screening + Normal delivery by a skilled attendant + Active management and initial treatment of PPH + Management of OL + Community-based pneumonia (80%)                                                                                                                                       | \$477                         | \$26      | \$36     | \$539      | 26.3                            | \$20                          | Dominated                     |
| 179 | Community newborn care package + Tetanus Toxoid + Pre-eclampsia screening + Asymptomatic bacteriuria screening + SMNC + Management of OL + Community-based                                                                                                                                                                                                                                          | \$477                         | \$30      | \$39     | \$546      | 26.4                            | \$21                          | Dominated                     |

| No. | Description of intervention                                                                                                                                                                                        | Yearly Costs (millions Int\$) |           |          | Total Cost | Yearly DALYs averted (millions) | ACER (Int\$ per DALY averted) | ICER (Int\$ per DALY averted) |
|-----|--------------------------------------------------------------------------------------------------------------------------------------------------------------------------------------------------------------------|-------------------------------|-----------|----------|------------|---------------------------------|-------------------------------|-------------------------------|
|     |                                                                                                                                                                                                                    | Patient                       | Programme | Training |            |                                 |                               |                               |
| 180 | pneumonia (80%)<br>Community newborn care package + Tetanus Toxoid + Pre-eclampsia screening + Asymptomatic bacteriuria screening + SMNC + Treatment of severe PEE + Community-based pneumonia (80%)               | \$372                         | \$30      | \$39     | \$441      | 26.5                            | \$17                          | Dominated                     |
| 181 | Community newborn care package + Tetanus Toxoid + Pre-eclampsia screening + Asymptomatic bacteriuria screening + SMNC + Treatment of severe PEE + Community-based pneumonia + Management of OL (80%)               | \$566                         | \$34      | \$39     | \$638      | 26.5                            | \$24                          | Dominated                     |
| 182 | Community newborn care package + Tetanus Toxoid + Pre-eclampsia screening + Asymptomatic bacteriuria screening + SMNC + Treatment of severe PEE + Community-based pneumonia + Maternal sepsis (80%)                | \$439                         | \$30      | \$39     | \$507      | 26.7                            | \$19                          | Dominated                     |
| 183 | Community newborn care package + Tetanus Toxoid + Pre-eclampsia screening + Asymptomatic bacteriuria screening + SMNC + Treatment of severe PEE + PPH referral + Community-based pneumonia (80%)                   | \$403                         | \$30      | \$39     | \$471      | 26.6                            | \$18                          | Dominated                     |
| 184 | Community newborn care package + Tetanus Toxoid + Pre-eclampsia screening + Asymptomatic bacteriuria screening + SMNC + Treatment of severe PEE + PPH referral + Community-based pneumonia + Maternal sepsis (80%) | \$469                         | \$30      | \$39     | \$538      | 26.8                            | \$20                          | Dominated                     |
| 185 | Community newborn care package + Tetanus Toxoid + Pre-eclampsia screening + Asymptomatic bacteriuria screening + SMNC + Treatment of severe PEE + Management of OL + PPH referral + Community-based pneumonia +    | \$863                         | \$39      | \$51     | \$953      | 27.4                            | \$35                          | Dominated                     |

| No. | Description of intervention                                                                                                                                                                      | Yearly Costs (millions Int\$) |           |          | Total Cost | Yearly DALYs averted (millions) | ACER (Int\$ per DALY averted) | ICER (Int\$ per DALY averted) |
|-----|--------------------------------------------------------------------------------------------------------------------------------------------------------------------------------------------------|-------------------------------|-----------|----------|------------|---------------------------------|-------------------------------|-------------------------------|
|     |                                                                                                                                                                                                  | Patient                       | Programme | Training |            |                                 |                               |                               |
| 186 | Maternal sepsis + ENC (80%)<br>Community newborn care package + ANC + SMNC + Treatment of severe PEE + Management of OL + PPH referral + Community-based pneumonia + Maternal sepsis + ENC (80%) | \$867                         | \$41      | \$53     | \$961      | 27.4                            | \$35                          | Dominated                     |
| 187 | Community newborn care package + ANC + SMNC + Treatment of severe PEE + Management of OL + PPH referral + Community-based pneumonia + Maternal sepsis + ENC + Antibiotics pPROM (80%)            | \$916                         | \$41      | \$53     | \$1,009    | 27.4                            | \$37                          | Dominated                     |
| 189 | Community newborn care package (50%)                                                                                                                                                             | \$40                          | \$7       | \$3      | \$50       | 8.5                             | \$6                           | Dominated                     |
| 190 | Support for breastfeeding mothers (50%)                                                                                                                                                          | \$41                          | \$7       | \$1      | \$49       | 8.5                             | \$6                           | \$6                           |
| 191 | Pre-eclampsia screening (50%)                                                                                                                                                                    | \$36                          | \$2       | \$3      | \$40       | 0.1                             | \$270                         | Dominated                     |
| 192 | Tetanus toxoid (50%)                                                                                                                                                                             | \$42                          | \$2       | \$3      | \$47       | 6.3                             | \$7                           | Dominated                     |
| 193 | Screening & treatment of asymptomatic bacteriuria (50%)                                                                                                                                          | \$21                          | \$2       | \$3      | \$25       | 0.1                             | \$406                         | Dominated                     |
| 194 | Screening & treatment of syphilis (50%)                                                                                                                                                          | \$23                          | \$2       | \$3      | \$27       | 0.0                             | \$3,677                       | Dominated                     |
| 195 | Normal delivery by a skilled attendant (50%)                                                                                                                                                     | \$99                          | \$2       | \$6      | \$107      | 4.0                             | \$27                          | Dominated                     |
| 196 | Community-based case management for neonatal pneumonia (50%)                                                                                                                                     | \$1                           | \$0       | \$3      | \$4        | 0.0                             | \$122                         | Dominated                     |
| 197 | Normal delivery by a skilled attendant + Tetanus Toxoid (50%)                                                                                                                                    | \$142                         | \$2       | \$8      | \$151      | 6.9                             | \$22                          | Dominated                     |
| 198 | Management of maternal sepsis (50%)                                                                                                                                                              | \$62                          | \$2       |          | \$64       | 0.3                             | \$239                         | Dominated                     |
| 199 | Management of severe neonatal asphyxia (50%)                                                                                                                                                     | \$12                          | \$2       | \$6      | \$20       | 0.0                             | \$10,495                      | Dominated                     |
| 200 | Management of serious newborn infections (50%)                                                                                                                                                   | \$63                          | \$2       | \$6      | \$71       | 0.0                             | \$1,756                       | Dominated                     |
| 201 | Management of very low birth weight babies (50%)                                                                                                                                                 | \$25                          | \$2       | \$6      | \$33       | 0.0                             | \$1,651                       | Dominated                     |
| 202 | Management of neonatal jaundice (50%)                                                                                                                                                            | \$11                          | \$2       | \$6      | \$19       | 0.0                             | \$30,254                      | Dominated                     |
| 203 | Tetanus toxoid + Pre-eclampsia screening (50%)                                                                                                                                                   | \$64                          | \$2       | \$3      | \$68       | 6.4                             | \$11                          | Dominated                     |
| 204 | Tetanus toxoid + Asymptomatic bacteriuria screening + Pre-eclampsia screening (50%)                                                                                                              | \$64                          | \$4       | \$3      | \$71       | 6.5                             | \$11                          | Dominated                     |

| No. | Description of intervention                                                                                                                                 | Yearly Costs (millions Int\$) |           |          |            | Yearly DALYs averted (millions) | ACER (Int\$ per DALY averted) | ICER (Int\$ per DALY averted) |
|-----|-------------------------------------------------------------------------------------------------------------------------------------------------------------|-------------------------------|-----------|----------|------------|---------------------------------|-------------------------------|-------------------------------|
|     |                                                                                                                                                             | Patient                       | Programme | Training | Total Cost |                                 |                               |                               |
| 205 | Tetanus toxoid + Asymptomatic bacteriuria screening screening + Pre-eclampsia screening + Syphilis screening (50%)                                          | \$66                          | \$5       | \$4      | \$76       | 6.5                             | \$12                          | Dominated                     |
| 206 | Tetanus toxoid + Normal delivery by a skilled attendant + Active management + Initial PPH treatment (50%)                                                   | \$153                         | \$4       | \$11     | \$168      | 7.6                             | \$22                          | Dominated                     |
| 207 | Tetanus toxoid + Normal delivery by a skilled attendant + Resuscitation (50%)                                                                               | \$142                         | \$4       | \$9      | \$155      | 7.0                             | \$22                          | Dominated                     |
| 208 | Tetanus toxoid + Normal delivery by a skilled attendant + Management of OL (50%)                                                                            | \$249                         | \$4       | \$8      | \$261      | 7.0                             | \$37                          | Dominated                     |
| 209 | Tetanus toxoid + Normal delivery by a skilled attendant + Active management + Initial PPH treatment + Referral PPH treatment (50%)                          | \$177                         | \$4       | \$11     | \$192      | 7.7                             | \$25                          | Dominated                     |
| 210 | Tetanus toxoid + Normal delivery by a skilled attendant + Antibiotics pPROM (50%)                                                                           | \$179                         | \$8       | \$9      | \$196      | 7.0                             | \$28                          | Dominated                     |
| 211 | Tetanus toxoid + Normal delivery by a skilled attendant + Steroids for pre-term (50%)                                                                       | \$254                         | \$4       | \$9      | \$267      | 7.0                             | \$38                          | Dominated                     |
| 212 | Tetanus toxoid + Normal delivery by a skilled attendant + Treatment of severe PEE (50%)                                                                     | \$172                         | \$2       | \$8      | \$182      | 7.1                             | \$26                          | Dominated                     |
| 213 | Management of vLBW + Management of serious newborn infections (50%)                                                                                         | \$126                         | \$4       | \$6      | \$137      | 0.1                             | \$2,243                       | Dominated                     |
| 214 | Management of vLBW + Management of serious newborn infections + Severe asphyxia (50%)                                                                       | \$138                         | \$4       | \$6      | \$148      | 0.1                             | \$2,363                       | Dominated                     |
| 215 | ENC (50%)                                                                                                                                                   | \$149                         | \$5       | \$6      | \$161      | 0.3                             | \$488                         | Dominated                     |
| 216 | ENC + Management of maternal sepsis (50%)                                                                                                                   | \$224                         | \$7       | \$6      | \$237      | 0.3                             | \$717                         | Dominated                     |
| 217 | Community newborn care package + Community-based pneumonia (50%)                                                                                            | \$41                          | \$16      | \$8      | \$65       | 8.6                             | \$8                           | Dominated                     |
| 218 | Tetanus toxoid + Asymptomatic bacteriuria screening screening + Pre-eclampsia screening + Syphilis screening + Normal delivery by a skilled attendant (50%) | \$165                         | \$9       | \$11     | \$185      | 7.1                             | \$26                          | Dominated                     |

| No. | Description of intervention                                                                                                                                                 | Yearly Costs (millions Int\$) |           |          | Total Cost | Yearly DALYs averted (millions) | ACER (Int\$ per DALY averted) | ICER (Int\$ per DALY averted) |
|-----|-----------------------------------------------------------------------------------------------------------------------------------------------------------------------------|-------------------------------|-----------|----------|------------|---------------------------------|-------------------------------|-------------------------------|
|     |                                                                                                                                                                             | Patient                       | Programme | Training |            |                                 |                               |                               |
| 219 | Tetanus toxoid+Asymptomatic bacteriuria screening+Pre-eclampsia screening+Syphilis screening+Normal delivery by a skilled attendant+Treatment of severe PEE                 | \$188                         | \$9       | \$11     | \$208      | 7.2                             | \$29                          | Dominated                     |
| 220 | Tetanus toxoid + bacteruria + Pre-eclampsia screening+ Syphilis screening + Normal delivery by a skilled attendant + Maternal sepsis referral (50%)                         | \$212                         | \$9       | \$11     | \$232      | 7.3                             | \$32                          | Dominated                     |
| 221 | Tetanus toxoid + bacteruria + Pre-eclampsia screening+ Syphilis screening + Normal delivery by a skilled attendant + Neonatal sepsis referral (50%)                         | \$227                         | \$9       | \$16     | \$251      | 7.2                             | \$35                          | Dominated                     |
| 222 | Tetanus toxoid + bacteruria + Pre-eclampsia screening+ Syphilis screening + Normal delivery by a skilled attendant + antibiotics for pPROM + Maternal sepsis referral (50%) | \$244                         | \$9       | \$11     | \$264      | 7.3                             | \$36                          | Dominated                     |
| 223 | Tetanus toxoid + bacteruria + Pre-eclampsia screening+ Syphilis screening + Normal delivery by a skilled attendant + antibiotics for pPROM + Neonatal sepsis referral (50%) | \$263                         | \$9       | \$16     | \$287      | 7.2                             | \$40                          | Dominated                     |
| 224 | Community newborn care package + Tetanus Toxoid (50%)                                                                                                                       | \$83                          | \$9       | \$5      | \$97       | 14.8                            | \$7                           | Dominated                     |
| 225 | Community-based pneumonia + Tetanus Toxoid (50%)                                                                                                                            | \$43                          | \$2       | \$6      | \$51       | 6.3                             | \$8                           | Dominated                     |
| 226 | Community-based pneumonia + ANC (50%)                                                                                                                                       | \$66                          | \$6       | \$7      | \$80       | 6.5                             | \$12                          | Dominated                     |
| 227 | Community newborn care package + Tetanus Toxoid + Community-based pneumonia (50%)                                                                                           | \$83                          | \$17      | \$11     | \$111      | 14.8                            | \$8                           | Dominated                     |
| 228 | Support for breastfeeding mothers + Tetanus toxoid (50%)                                                                                                                    | \$84                          | \$9       | \$4      | \$96       | 14.8                            | \$7                           | Dominated                     |
| 229 | Community newborn care package + ANC (50%)                                                                                                                                  | \$106                         | \$13      | \$7      | \$126      | 15.0                            | \$8                           | Dominated                     |

| No. | Description of intervention                                                                                                                                  | Yearly Costs (millions Int\$) |           |          |            | Yearly DALYs averted (millions) | ACER (Int\$ per DALY averted) | ICER (Int\$ per DALY averted) |
|-----|--------------------------------------------------------------------------------------------------------------------------------------------------------------|-------------------------------|-----------|----------|------------|---------------------------------|-------------------------------|-------------------------------|
|     |                                                                                                                                                              | Patient                       | Programme | Training | Total Cost |                                 |                               |                               |
| 230 | Community newborn care package + ANC + Community-based pneumonia (50%)                                                                                       | \$107                         | \$21      | \$12     | \$140      | 15.1                            | \$9                           | Dominated                     |
| 231 | Community newborn care package + ANC + Community-based pneumonia + SMNC (50%)                                                                                | \$217                         | \$30      | \$23     | \$270      | 16.4                            | \$16                          | Dominated                     |
| 232 | Community newborn care package + ANC + Community-based pneumonia + Management of vLBW (50%)                                                                  | \$132                         | \$23      | \$19     | \$174      | 15.1                            | \$12                          | Dominated                     |
| 233 | Community newborn care package + ANC + Community-based pneumonia + SMNC + Treatment of severe PEE + Referral PPH + Maternal sepsis + Antibiotics pPROM (50%) | \$348                         | \$36      | \$24     | \$409      | 16.8                            | \$24                          | Dominated                     |
| 234 | Community newborn care package + ANC + Community-based pneumonia + SMNC + Management of vLBW (50%)                                                           | \$242                         | \$31      | \$29     | \$303      | 16.5                            | \$18                          | Dominated                     |
| 235 | Community newborn care package + ANC + Community-based pneumonia + SMNC + Treatment of severe PEE (50%)                                                      | \$240                         | \$30      | \$23     | \$293      | 16.5                            | \$18                          | Dominated                     |
| 236 | Community newborn care package + ANC + Community-based pneumonia + SMNC + Treatment of severe PEE + Steroids pre-term (50%)                                  | \$352                         | \$32      | \$24     | \$409      | 16.6                            | \$25                          | Dominated                     |
| 237 | Community newborn care package + ANC + Community-based pneumonia + SMNC + Treatment of severe PEE + Management of OL (50%)                                   | \$347                         | \$32      | \$23     | \$402      | 16.6                            | \$24                          | Dominated                     |
| 238 | Community newborn care package + ANC + Community-based pneumonia + SMNC + Treatment of severe PEE + ENC (50%)                                                | \$389                         | \$35      | \$29     | \$454      | 16.9                            | \$27                          | Dominated                     |
| 239 | Community newborn care package + ANC + Community-based pneumonia + SMNC + Treatment of severe PEE (50%)                                                      | \$240                         | \$30      | \$23     | \$293      | 16.5                            | \$18                          | Dominated                     |
| 240 | Community newborn care package + ANC +                                                                                                                       | \$419                         | \$32      | \$23     | \$474      | 16.8                            | \$28                          | Dominated                     |

| No. | Description of intervention                                                                                                                                                                                                                          | Yearly Costs (millions Int\$) |           |          | Total Cost | Yearly DALYs averted (millions) | ACER (Int\$ per DALY averted) | ICER (Int\$ per DALY averted) |
|-----|------------------------------------------------------------------------------------------------------------------------------------------------------------------------------------------------------------------------------------------------------|-------------------------------|-----------|----------|------------|---------------------------------|-------------------------------|-------------------------------|
|     |                                                                                                                                                                                                                                                      | Patient                       | Programme | Training |            |                                 |                               |                               |
| 241 | Community-based pneumonia + SMNC + Treatment of severe PEE + Referral PPH + Maternal sepsis + Management of OL (50%)<br>Community newborn care package + ANC + Community-based pneumonia + SMNC + Treatment of severe PEE + Management of vLBW (50%) | \$266                         | \$31      | \$29     | \$326      | 16.6                            | \$20                          | Dominated                     |
| 242 | Community newborn care package + Tetanus Toxoid + Pre-eclampsia screening + Asymptomatic bacteriuria screening + Community-based pneumonia (50%)                                                                                                     | \$104                         | \$20      | \$11     | \$136      | 15.0                            | \$9                           | Dominated                     |
| 243 | Community newborn care package + ANC + Community-based pneumonia + SMNC + Treatment of severe PEE + ENC (50%)                                                                                                                                        | \$389                         | \$35      | \$29     | \$454      | 16.9                            | \$27                          | Dominated                     |
| 244 | Community newborn care package + ANC + Community-based pneumonia + SMNC + Treatment of severe PEE + Management of OL (50%)                                                                                                                           | \$347                         | \$32      | \$23     | \$402      | 16.6                            | \$24                          | Dominated                     |
| 245 | Community newborn care package + Tetanus Toxoid + Pre-eclampsia screening + Asymptomatic bacteriuria screening (50%)                                                                                                                                 | \$104                         | \$11      | \$6      | \$121      | 15.0                            | \$8                           | Dominated                     |
| 246 | Community newborn care package + ANC + SMNC + Treatment of severe PEE + PPH referral + Community-based pneumonia + Maternal sepsis + ENC (50%)                                                                                                       | \$461                         | \$32      | \$28     | \$520      | 17.1                            | \$30                          | Dominated                     |
| 247 | Community newborn care package + ANC + Community-based pneumonia + SMNC + Treatment of severe PEE + Management of OL + Steroids pre-term (50%)                                                                                                       | \$434                         | \$32      | \$24     | \$490      | 16.6                            | \$30                          | Dominated                     |
| 248 | Community newborn care package + ANC + Community-based pneumonia + SMNC + Treatment of severe PEE + Management of OL +                                                                                                                               | \$346                         | \$30      | \$23     | \$399      | 16.6                            | \$24                          | Dominated                     |



| No. | Description of intervention                                                                                                                                                                                                             | Yearly Costs (millions Int\$) |           |          | Total Cost | Yearly DALYs averted (millions) | ACER (Int\$ per DALY averted) | ICER (Int\$ per DALY averted) |
|-----|-----------------------------------------------------------------------------------------------------------------------------------------------------------------------------------------------------------------------------------------|-------------------------------|-----------|----------|------------|---------------------------------|-------------------------------|-------------------------------|
|     |                                                                                                                                                                                                                                         | Patient                       | Programme | Training |            |                                 |                               |                               |
| 249 | Referral PPH (50%)<br>Community newborn care package + ANC +<br>Community-based pneumonia + SMNC +<br>Treatment of severe PEE + Management of OL +<br>Management of maternal sepsis (50%)                                               | \$369                         | \$30      | \$23     | \$421      | 16.7                            | \$25                          | Dominated                     |
| 250 | Community newborn care package + ANC +<br>Community-based pneumonia + SMNC +<br>Treatment of severe PEE + Management of OL +<br>Antibiotics pPROM (50%)                                                                                 | \$359                         | \$36      | \$24     | \$419      | 16.6                            | \$25                          | Dominated                     |
| 251 | Community newborn care package + ANC +<br>Community-based pneumonia + SMNC +<br>Treatment of severe PEE + Management of OL +<br>ENC (50%)                                                                                               | \$471                         | \$35      | \$29     | \$536      | 16.9                            | \$32                          | Dominated                     |
| 252 | Community newborn care package + ANC +<br>Community-based pneumonia + SMNC +<br>Treatment of severe PEE + Management of OL +<br>ENC + Steroids pre-term (50%)                                                                           | \$583                         | \$37      | \$31     | \$651      | 16.9                            | \$38                          | Dominated                     |
| 253 | Community newborn care package + Tetanus<br>Toxoid + Normal delivery by a skilled attendant +<br>Active management and initial treatment of PPH<br>(50%)                                                                                | \$193                         | \$11      | \$13     | \$218      | 16.2                            | \$13                          | Dominated                     |
| 254 | Community newborn care package + Tetanus<br>Toxoid + Pre-eclampsia screening +<br>Asymptomatic bacteriuria screening + SMNC +<br>Treatment of severe PEE + PPH referral +<br>Community-based pneumonia + Maternal sepsis<br>+ ENC (50%) | \$458                         | \$30      | \$27     | \$516      | 17.1                            | \$30                          | Dominated                     |
| 255 | Community newborn care package + ANC +<br>ENC + SMNC + Treatment of severe PEE +<br>Management of OL + Steroids pre-term +<br>Community-based pneumonia care (50%)                                                                      | \$583                         | \$37      | \$31     | \$651      | 16.9                            | \$38                          | Dominated                     |
| 256 | Community newborn care package + ANC +                                                                                                                                                                                                  | \$518                         | \$35      | \$29     | \$582      | 17.1                            | \$34                          | Dominated                     |

| No. | Description of intervention                                                                                                                                                                                                                                              | Yearly Costs (millions Int\$) |           |          | Total Cost | Yearly DALYs averted (millions) | ACER (Int\$ per DALY averted) | ICER (Int\$ per DALY averted) |
|-----|--------------------------------------------------------------------------------------------------------------------------------------------------------------------------------------------------------------------------------------------------------------------------|-------------------------------|-----------|----------|------------|---------------------------------|-------------------------------|-------------------------------|
|     |                                                                                                                                                                                                                                                                          | Patient                       | Programme | Training |            |                                 |                               |                               |
| 257 | ENC + SMNC + Treatment of severe PEE + Management of OL + Maternal sepsis + Community-based pneumonia care (50%)<br>Community newborn care package + ANC + ENC + SMNC + Treatment of severe PEE + Management of OL + PPH referral + Community-based pneumonia care (50%) | \$495                         | \$35      | \$29     | \$560      | 17.0                            | \$33                          | Dominated                     |
| 258 | Community newborn care package + ANC + ENC + SMNC + Treatment of severe PEE + Management of OL + Steroids pre-term + Maternal sepsis + Community-based pneumonia care (50%)                                                                                              | \$630                         | \$37      | \$31     | \$698      | 17.1                            | \$41                          | Dominated                     |
| 259 | Community newborn care package + ANC + ENC + SMNC + Treatment of severe PEE + Management of OL + Steroids pre-term + PPH referral + Community-based pneumonia care (50%)                                                                                                 | \$607                         | \$37      | \$31     | \$676      | 17.0                            | \$40                          | Dominated                     |
| 260 | Community newborn care package + ANC + ENC + SMNC + Treatment of severe PEE + Management of OL + Steroids pre-term + Antibiotics pPROM + Community-based pneumonia care (50%)                                                                                            | \$620                         | \$44      | \$32     | \$696      | 17.0                            | \$41                          | Dominated                     |
| 261 | Community newborn care package + ANC + ENC + SMNC + Treatment of severe PEE + Management of OL + Steroids pre-term + Maternal sepsis + Antibiotics pPROM + Community-based pneumonia care (50%)                                                                          | \$662                         | \$37      | \$31     | \$730      | 17.1                            | \$43                          | Dominated                     |
| 262 | Community newborn care package + ANC + ENC + SMNC + Treatment of severe PEE + Management of OL + Steroids pre-term + Maternal sepsis + PPH referral + Community-based pneumonia care (50%)                                                                               | \$654                         | \$37      | \$31     | \$723      | 17.2                            | \$42                          | Dominated                     |

| No. | Description of intervention                                                                                                                                                                                                                | Yearly Costs (millions Int\$) |           |          | Total Cost | Yearly DALYs averted (millions) | ACER (Int\$ per DALY averted) | ICER (Int\$ per DALY averted) |
|-----|--------------------------------------------------------------------------------------------------------------------------------------------------------------------------------------------------------------------------------------------|-------------------------------|-----------|----------|------------|---------------------------------|-------------------------------|-------------------------------|
|     |                                                                                                                                                                                                                                            | Patient                       | Programme | Training |            |                                 |                               |                               |
| 263 | Community newborn care package + ANC + ENC + SMNC + Treatment of severe PEE + Management of OL + Steroids pre-term + Maternal sepsis + Antibiotics pPROM + PPH referral + Community-based pneumonia care (50%)                             | \$686                         | \$37      | \$31     | \$755      | 17.2                            | \$44                          | Dominated                     |
| 264 | Community newborn care package + Tetanus Toxoid + SMNC (50%)                                                                                                                                                                               | \$193                         | \$14      | \$15     | \$222      | 16.2                            | \$14                          | Dominated                     |
| 265 | Community newborn care package + Tetanus Toxoid + Normal delivery by a skilled attendant + Active management and initial treatment of PPH + Community-based pneumonia (50%)                                                                | \$194                         | \$20      | \$19     | \$232      | 16.2                            | \$14                          | Dominated                     |
| 266 | Community newborn care package + Tetanus Toxoid + SMNC + Community-based pneumonia (50%)                                                                                                                                                   | \$194                         | \$22      | \$20     | \$236      | 16.2                            | \$15                          | Dominated                     |
| 267 | Community newborn care package + Tetanus Toxoid + Pre-eclampsia screening + Asymptomatic bacteriuria screening + Normal delivery by a skilled attendant + Active management and initial treatment of PPH (50%)                             | \$214                         | \$14      | \$14     | \$242      | 16.4                            | \$15                          | Dominated                     |
| 268 | Community newborn care package + Tetanus Toxoid + Pre-eclampsia screening + Asymptomatic bacteriuria screening + Normal delivery by a skilled attendant + Active management and initial treatment of PPH + Community-based pneumonia (50%) | \$215                         | \$22      | \$19     | \$257      | 16.4                            | \$16                          | Dominated                     |
| 269 | Community newborn care package + Tetanus Toxoid + Pre-eclampsia screening + Asymptomatic bacteriuria screening + Normal delivery by a skilled attendant + Active management and initial treatment of PPH + Management of OL (50%)          | \$296                         | \$14      | \$14     | \$324      | 16.4                            | \$20                          | Dominated                     |

| No. | Description of intervention                                                                                                                                                                                                                                   | Yearly Costs (millions Int\$) |           |          | Total Cost | Yearly DALYs averted (millions) | ACER (Int\$ per DALY averted) | ICER (Int\$ per DALY averted) |
|-----|---------------------------------------------------------------------------------------------------------------------------------------------------------------------------------------------------------------------------------------------------------------|-------------------------------|-----------|----------|------------|---------------------------------|-------------------------------|-------------------------------|
|     |                                                                                                                                                                                                                                                               | Patient                       | Programme | Training |            |                                 |                               |                               |
| 270 | Community newborn care package + Tetanus Toxoid + Pre-eclampsia screening + Asymptomatic bacteriuria screening + Normal delivery by a skilled attendant + Active management and initial treatment of PPH + Management of OL + Community-based pneumonia (50%) | \$296                         | \$22      | \$19     | \$338      | 16.5                            | \$21                          | Dominated                     |
| 271 | Community newborn care package + Tetanus Toxoid + Pre-eclampsia screening + Asymptomatic bacteriuria screening + SMNC + Management of OL (50%)                                                                                                                | \$296                         | \$16      | \$15     | \$327      | 16.5                            | \$20                          | Dominated                     |
| 272 | Community newborn care package + Tetanus Toxoid + Pre-eclampsia screening + Asymptomatic bacteriuria screening + Normal delivery by a skilled attendant + Active management and initial treatment of PPH + Management of OL + Community-based pneumonia (50%) | \$296                         | \$22      | \$19     | \$338      | 16.5                            | \$21                          | Dominated                     |
| 273 | Community newborn care package + Tetanus Toxoid + Pre-eclampsia screening + Asymptomatic bacteriuria screening + SMNC + Management of OL + Community-based pneumonia (50%)                                                                                    | \$296                         | \$25      | \$21     | \$342      | 16.5                            | \$21                          | Dominated                     |
| 274 | Community newborn care package + Tetanus Toxoid + Pre-eclampsia screening + Asymptomatic bacteriuria screening + SMNC + Treatment of severe PEE + Community-based pneumonia (50%)                                                                             | \$238                         | \$25      | \$21     | \$284      | 16.5                            | \$17                          | Dominated                     |
| 275 | Community newborn care package + Tetanus Toxoid + Pre-eclampsia screening + Asymptomatic bacteriuria screening + SMNC + Treatment of severe PEE + Community-based                                                                                             | \$345                         | \$27      | \$21     | \$393      | 16.6                            | \$24                          | Dominated                     |

| No. | Description of intervention                                                                                                                                                                                                                 | Yearly Costs (millions Int\$) |           |          | Total Cost | Yearly DALYs averted (millions) | ACER (Int\$ per DALY averted) | ICER (Int\$ per DALY averted) |
|-----|---------------------------------------------------------------------------------------------------------------------------------------------------------------------------------------------------------------------------------------------|-------------------------------|-----------|----------|------------|---------------------------------|-------------------------------|-------------------------------|
|     |                                                                                                                                                                                                                                             | Patient                       | Programme | Training |            |                                 |                               |                               |
| 276 | pneumonia + Management of OL (50%)<br>Community newborn care package + Tetanus Toxoid + Pre-eclampsia screening + Asymptomatic bacteriuria screening + SMNC + Treatment of severe PEE + Community-based pneumonia + Maternal sepsis (50%)   | \$285                         | \$25      | \$21     | \$330      | 16.7                            | \$20                          | Dominated                     |
| 277 | Community newborn care package + Tetanus Toxoid + Pre-eclampsia screening + Asymptomatic bacteriuria screening + SMNC + Treatment of severe PEE + PPH referral + Community-based pneumonia (50%)                                            | \$262                         | \$25      | \$21     | \$308      | 16.6                            | \$19                          | Dominated                     |
| 278 | Community newborn care package + Tetanus Toxoid + Pre-eclampsia screening + Asymptomatic bacteriuria screening + SMNC + Treatment of severe PEE + PPH referral + Community-based pneumonia + Maternal sepsis (50%)                          | \$309                         | \$25      | \$21     | \$355      | 16.8                            | \$21                          | Dominated                     |
| 279 | Community newborn care package + Tetanus Toxoid + Pre-eclampsia screening + Asymptomatic bacteriuria screening + SMNC + Treatment of severe PEE + Management of OL + PPH referral + Community-based pneumonia + Maternal sepsis + ENC (50%) | \$540                         | \$30      | \$27     | \$598      | 17.1                            | \$35                          | Dominated                     |
| 280 | Community newborn care package + ANC + SMNC + Treatment of severe PEE + Management of OL + PPH referral + Community-based pneumonia + Maternal sepsis + ENC (50%)                                                                           | \$542                         | \$32      | \$28     | \$602      | 17.1                            | \$35                          | Dominated                     |
| 281 | Community newborn care package + ANC + SMNC + Treatment of severe PEE + Management of OL + PPH referral + Community-based pneumonia + Maternal sepsis + ENC + Antibiotics pPROM (50%)                                                       | \$574                         | \$32      | \$28     | \$634      | 17.2                            | \$37                          | Dominated                     |
