# Supplementary material
Source: PubMed Central journal article supplement (PMC1283271)
Supplement: bmj_331_7525_1107__4.pdf [file bmj_331_7525_1107__4.pdf]

**Table H** Alternative choices for scaling up interventions in Afr-E and examples of dominated interventions in 2000\*

| <b>Intervention package</b>                                                                    | <b>Description (coverage)</b>                                                                                                                                                                                                                                                                         | <b>Additional intervention components</b>                                                  | <b>Yearly DALYs averted (millions)</b> | <b>Yearly cost (Int\$m)</b> | <b>ACER</b> |
|------------------------------------------------------------------------------------------------|-------------------------------------------------------------------------------------------------------------------------------------------------------------------------------------------------------------------------------------------------------------------------------------------------------|--------------------------------------------------------------------------------------------|----------------------------------------|-----------------------------|-------------|
| <b>Alternative intervention packages for scaling up maternal and neonatal health services:</b> |                                                                                                                                                                                                                                                                                                       |                                                                                            |                                        |                             |             |
| B1                                                                                             | Community newborn care package+selected antenatal care+community based management of neonatal pneumonia+skilled maternal care and immediate care of newborn+treatment of severe pre-eclampsia+management of obstructed labour (95%)                                                                   | Compared with A6: management of obstructed labour, breech presentation, and fetal distress | 17.7                                   | 469                         | 26          |
| B2                                                                                             | Community newborn care package+selected antenatal care+community based management of neonatal pneumonia+skilled maternal care and immediate care of newborn+treatment of severe pre-eclampsia+management of obstructed labour (95%)                                                                   | Compared with A8: referral care for post-partum haemorrhage                                | 21.0                                   | 609                         | 29          |
| B3                                                                                             | Community newborn care package+selected antenatal care+community based management of neonatal pneumonia+skilled maternal care and immediate care of newborn+treatment of severe pre-eclampsia+management of obstructed labour+emergency neonatal care+referral care for post-partum haemorrhage (95%) | Compared with A8: referral care for post-partum haemorrhage, management of maternal sepsis | 21.4                                   | 647                         | 30          |

|                                               |                                                                                                                                                                                                                                                                                                                                                                                             |                                                                                                                                                     |      |     |     |
|-----------------------------------------------|---------------------------------------------------------------------------------------------------------------------------------------------------------------------------------------------------------------------------------------------------------------------------------------------------------------------------------------------------------------------------------------------|-----------------------------------------------------------------------------------------------------------------------------------------------------|------|-----|-----|
|                                               | pneumonia+skilled maternal care and immediate care of newborn+treatment of severe pre-eclampsia+management of obstructed labour+emergency neonatal care+referral care for post-partum haemorrhage+management of maternal sepsis (95%)                                                                                                                                                       |                                                                                                                                                     | 21.6 | 680 | 32  |
| B4                                            | Community newborn care package +selected antenatal care+community based management of neonatal pneumonia+skilled maternal care and immediate care of newborn+treatment of severe pre-eclampsia+management of obstructed labour+emergency neonatal care+referral care for post-partum haemorrhage+management of maternal sepsis+antibiotics for preterm premature rupture of membranes (95%) | Compared with A8: referral care for post-partum haemorrhage, management of maternal sepsis, antibiotics for pre-term premature rupture of membranes |      |     |     |
| <b>Other dominated intervention packages:</b> |                                                                                                                                                                                                                                                                                                                                                                                             |                                                                                                                                                     |      |     |     |
| C1                                            | Tetanus toxoid (95%)                                                                                                                                                                                                                                                                                                                                                                        | —                                                                                                                                                   | 3.1  | 67  | 22  |
| C2                                            | Screening for pre-eclampsia (95%)                                                                                                                                                                                                                                                                                                                                                           | —                                                                                                                                                   | 0.7  | 65  | 99  |
| C3                                            | Screening and treatment of asymptomatic bacteriuria (95%)                                                                                                                                                                                                                                                                                                                                   | —                                                                                                                                                   | 0.3  | 40  | 117 |
| C4                                            | Screening and treatment of syphilis (95%)                                                                                                                                                                                                                                                                                                                                                   | —                                                                                                                                                   | 0.3  | 41  | 146 |

|    |                                                           |                                                                                                                                                         |     |     |    |
|----|-----------------------------------------------------------|---------------------------------------------------------------------------------------------------------------------------------------------------------|-----|-----|----|
| C5 | Selected antenatal care package (95%)                     | Tetanus toxoid, screening for pre-eclampsia, screening and treatment of asymptomatic bacteriuria, screening and treatment of syphilis                   | 4.3 | 102 | 23 |
| C6 | Skilled maternal care and immediate care of newborn (95%) | Normal delivery by skilled attendant, active management of third stage of labour, initial management of post-partum haemorrhage, neonatal resuscitation | 4.8 | 131 | 27 |

DALY=disability adjusted life year; ACER=Average cost-effectiveness ratio.

Afr-E= WHO defined region comprising of countries in sub-Saharan Africa with very high adult and child mortality\*Interventions that would not be chosen as they are less cost effective than alternatives in set.

**Table I** Alternative choices for scaling up interventions in Sear-D and examples of dominated interventions in 2000\*

| <b>Intervention package</b>                                                                    | <b>Description (coverage)</b>                                                                                                                                                                                                                                                                                                        | <b>Additional intervention components</b>                                                                                                             | <b>Yearly DALYs averted (millions)</b> | <b>Yearly cost (Int\$M)</b> | <b>ACER</b> |
|------------------------------------------------------------------------------------------------|--------------------------------------------------------------------------------------------------------------------------------------------------------------------------------------------------------------------------------------------------------------------------------------------------------------------------------------|-------------------------------------------------------------------------------------------------------------------------------------------------------|----------------------------------------|-----------------------------|-------------|
| <b>Alternative intervention packages for scaling up maternal and neonatal health services:</b> |                                                                                                                                                                                                                                                                                                                                      |                                                                                                                                                       |                                        |                             |             |
| E1                                                                                             | Community newborn care package + tetanus toxoid+screening for pre-eclampsia+screening and treatment for asymptomatic bacteriuria (95%)                                                                                                                                                                                               | Compared with D6: screening for pre-eclampsia, screening and treatment of asymptomatic bacteriuria                                                    | 29                                     | 245                         | 9           |
| E2                                                                                             | Community newborn care package + tetanus toxoid+screening for pre-eclampsia+screening and treatment for asymptomatic bacteriuria +community based management of neonatal pneumonia (95%)                                                                                                                                             | Compared with D6: screening for pre-eclampsia, screening and treatment for asymptomatic bacteriuria, community based management of neonatal pneumonia | 29                                     | 254                         | 9           |
| E3                                                                                             | Community newborn care package +selected antenatal care+community based management of neonatal pneumonia +skilled maternal care and immediate care of newborn+treatment of severe pre-eclampsia+referral care for post-partum haemorrhage+management of maternal sepsis+antibiotics for preterm premature rupture of membranes (95%) | Compared with D12: screening and treatment of syphilis, antibiotics for pre-term premature rupture of membranes                                       | 32                                     | 781                         | 25          |

|                                               |                                                                                                                                                                                                                                                                                                                                                            |                                                                                                                                                      |    |     |       |
|-----------------------------------------------|------------------------------------------------------------------------------------------------------------------------------------------------------------------------------------------------------------------------------------------------------------------------------------------------------------------------------------------------------------|------------------------------------------------------------------------------------------------------------------------------------------------------|----|-----|-------|
| E4                                            | Community newborn care package +selected antenatal care+community based management of neonatal pneumonia and +skilled maternal care and immediate care of newborn+treatment of severe pre-eclampsia+referral care for post-partum haemorrhage+management of maternal sepsis+management of obstructed labour, breech presentation, and fetal distress (95%) | Compared with D12: screening and treatment of syphilis, management of obstructed labour, breech presentation, and fetal distress                     | 32 | 976 | 31    |
| <b>Other dominated intervention packages:</b> |                                                                                                                                                                                                                                                                                                                                                            |                                                                                                                                                      |    |     |       |
| F1                                            | Tetanus toxoid (95%)                                                                                                                                                                                                                                                                                                                                       | —                                                                                                                                                    | 12 | 96  | 8     |
| F2                                            | Screening for pre-eclampsia (95%)                                                                                                                                                                                                                                                                                                                          | —                                                                                                                                                    | 0  | 84  | 300   |
| F3                                            | Screening and treatment of asymptomatic bacteriuria (95%)                                                                                                                                                                                                                                                                                                  | —                                                                                                                                                    | 0  | 53  | 444   |
| F4                                            | Screening and treatment of syphilis (95%)                                                                                                                                                                                                                                                                                                                  | —                                                                                                                                                    | 0  | 56  | 4,003 |
| F5                                            | Antenatal care (95%)                                                                                                                                                                                                                                                                                                                                       | Tetanus toxoid, screening for pre-eclampsia, screening and treatment of asymptomatic bacteriuria, screening and treatment of syphilis                | 12 | 155 | 13    |
| F6                                            | Skilled maternal care and immediate care of newborn (95%)                                                                                                                                                                                                                                                                                                  | Normal delivery by skilled attendant, active management of third stage labour, initial management of post-partum haemorrhage, neonatal resuscitation | 9  | 245 | 27    |

DALY=disability adjusted life year; ACER=Average cost-effectiveness ratio.

Sear-D=WHO defined region comprising of countries in South East Asia with high adult and child mortality\*Interventions that would not be chosen as they are less cost effective than alternatives in set.
